# Supplementary material for: Trans-eQTLs Reveal That Independent Genetic Variants Associated with a Complex Phenotype Converge on Intermediate Genes, with a Major Role for the HLA
Source: PubMed Central journal article supplement (PMC3150446; doi:10.1371/journal.pgen.1002197), 2011-08-04

### Principal component 1

- Peripheral Blood – COPD Cohort
- Peripheral Blood – Ulcerative Colitis Cohort
- Peripheral Blood – Amyotrophic Lateral Sclerosis Cohort
- Subcutaneous Adipose
- Visceral Adipose
- Liver
- Muscle

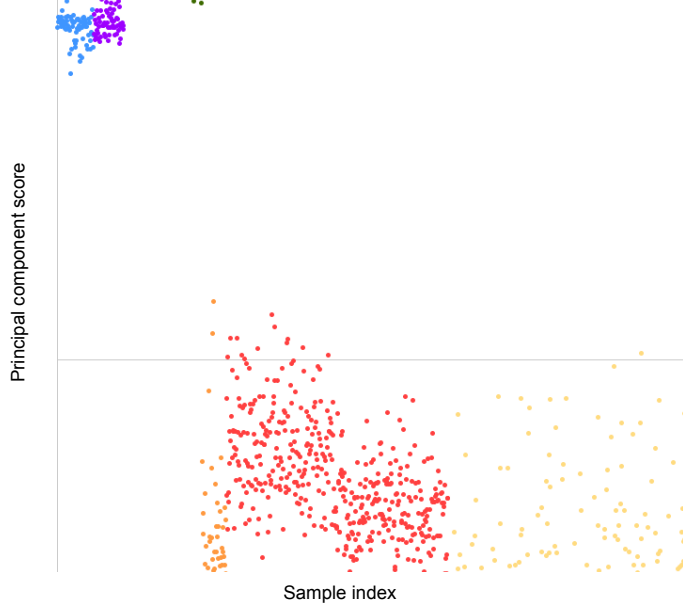

### Principal component 2

- Peripheral Blood – COPD Cohort
- Peripheral Blood – Ulcerative Colitis Cohort
- Peripheral Blood – Amyotrophic Lateral Sclerosis Cohort
- Subcutaneous Adipose
- Visceral Adipose
- Liver
- Muscle

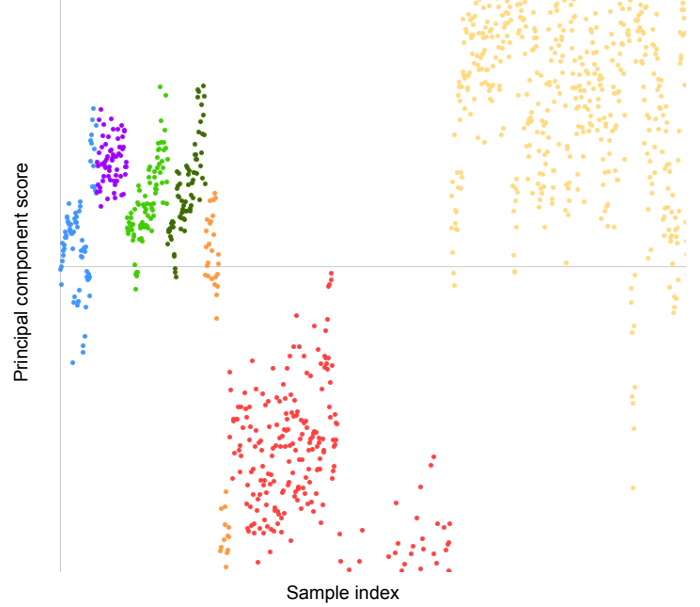

### Principal component 3

- Peripheral Blood – COPD Cohort
- Peripheral Blood – Ulcerative Colitis Cohort
- Peripheral Blood – Amyotrophic Lateral Sclerosis Cohort
- Subcutaneous Adipose
- Visceral Adipose
- Liver
- Muscle

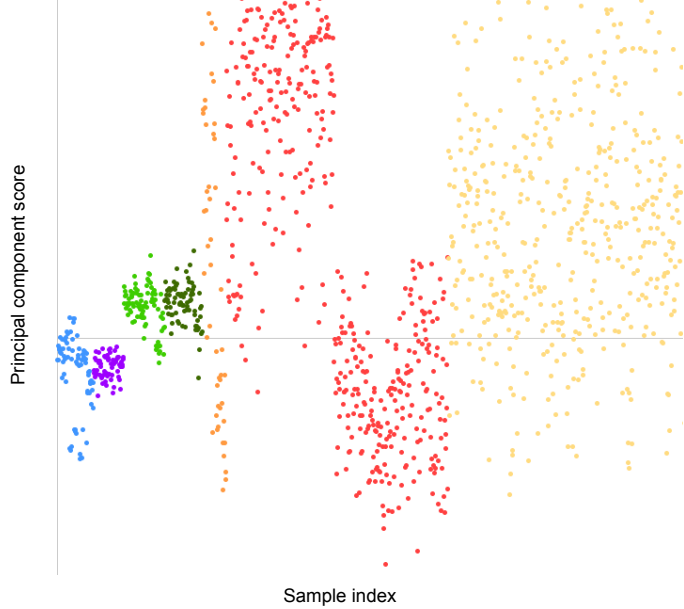

### Principal component 4

- Peripheral Blood – COPD Cohort
- Peripheral Blood – Ulcerative Colitis Cohort
- Peripheral Blood – Amyotrophic Lateral Sclerosis Cohort
- Subcutaneous Adipose
- Visceral Adipose
- Liver
- Muscle

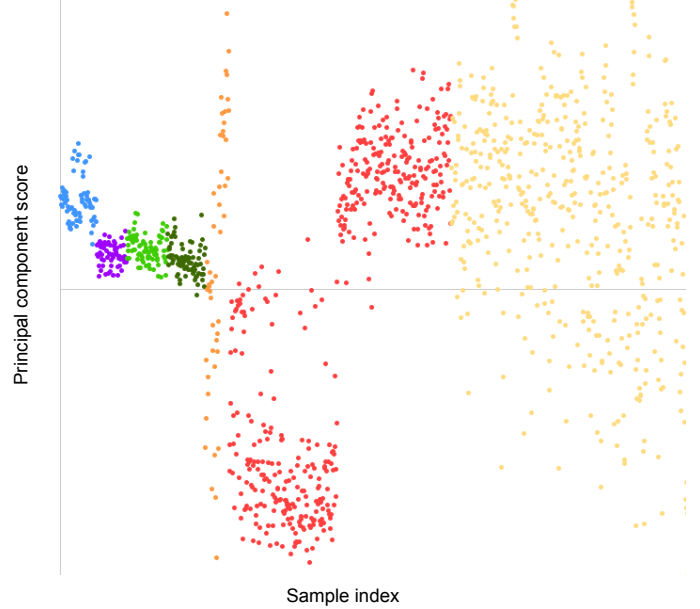

### Principal component 5

- Peripheral Blood – COPD Cohort
- Peripheral Blood – Ulcerative Colitis Cohort
- Peripheral Blood – Amyotrophic Lateral Sclerosis Cohort
- Subcutaneous Adipose
- Visceral Adipose
- Liver
- Muscle

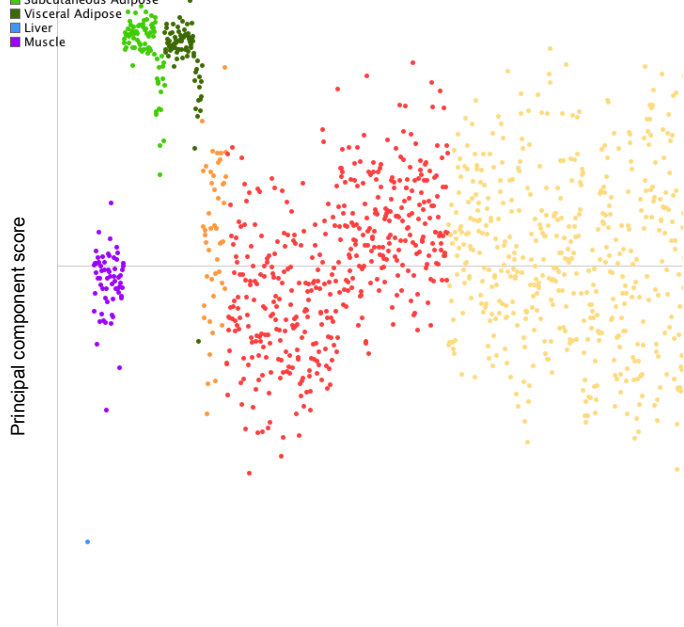

Sample index

### Principal component 6

- Peripheral Blood – COPD Cohort
- Peripheral Blood – Ulcerative Colitis Cohort
- Peripheral Blood – Amyotrophic Lateral Sclerosis Cohort
- Subcutaneous Adipose
- Visceral Adipose
- Liver
- Muscle

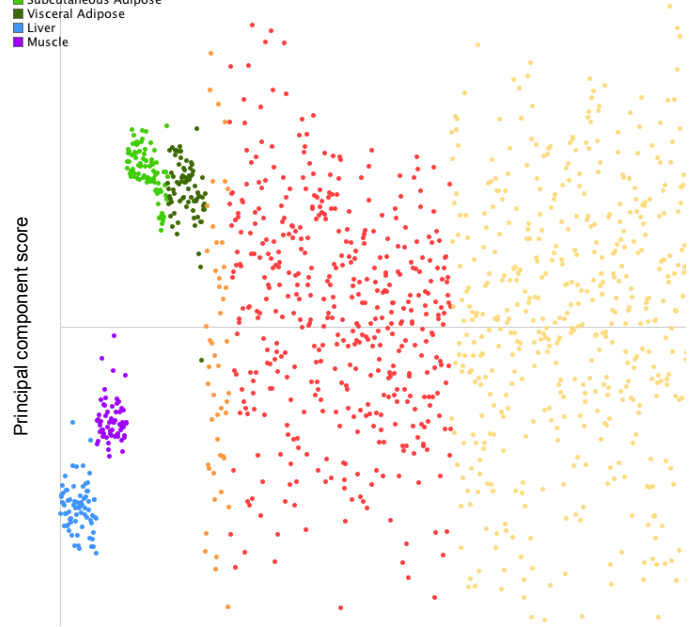

Sample index

### Principal component 7

- Peripheral Blood – COPD Cohort
- Peripheral Blood – Ulcerative Colitis Cohort
- Peripheral Blood – Amyotrophic Lateral Sclerosis Cohort
- Subcutaneous Adipose
- Visceral Adipose
- Liver
- Muscle

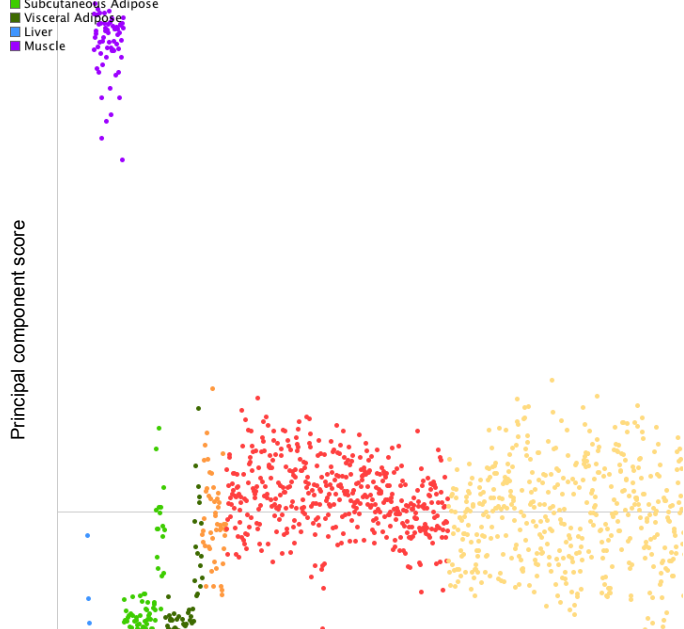

Sample index

### Principal component 8

- Peripheral Blood – COPD Cohort
- Peripheral Blood – Ulcerative Colitis Cohort
- Peripheral Blood – Amyotrophic Lateral Sclerosis Cohort
- Subcutaneous Adipose
- Visceral Adipose
- Liver
- Muscle

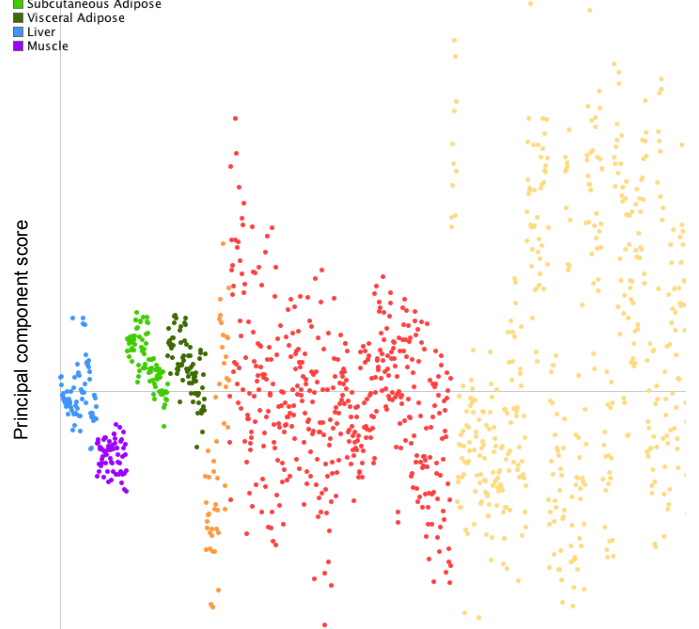

Sample index

### Principal component 9

- Peripheral Blood – COPD Cohort
- Peripheral Blood – Ulcerative Colitis Cohort
- Peripheral Blood – Amyotrophic Lateral Sclerosis Cohort
- Subcutaneous Adipose
- Visceral Adipose
- Liver
- Muscle

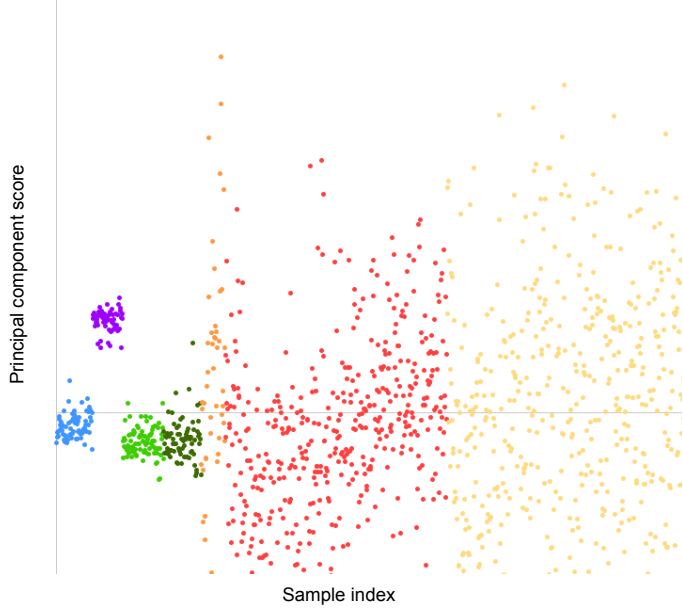

### Principal component 10

- Peripheral Blood – COPD Cohort
- Peripheral Blood – Ulcerative Colitis Cohort
- Peripheral Blood – Amyotrophic Lateral Sclerosis Cohort
- Subcutaneous Adipose
- Visceral Adipose
- Liver
- Muscle

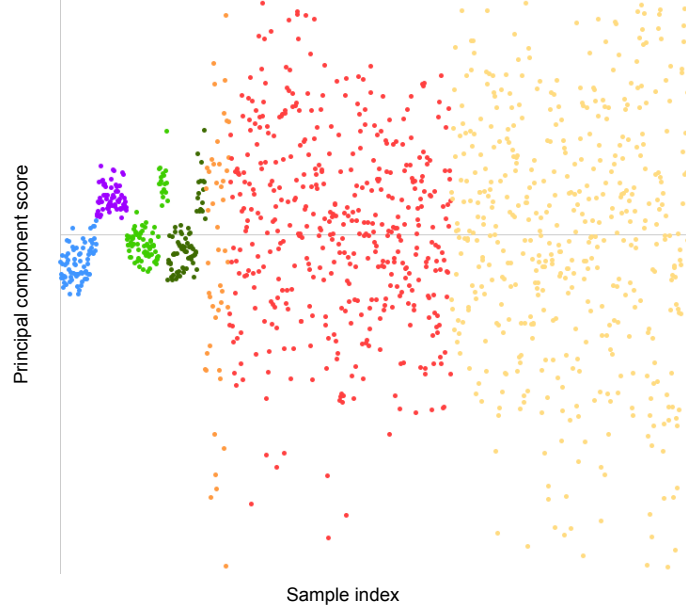

### Principal component 11

- Peripheral Blood – COPD Cohort
- Peripheral Blood – Ulcerative Colitis Cohort
- Peripheral Blood – Amyotrophic Lateral Sclerosis Cohort
- Subcutaneous Adipose
- Visceral Adipose
- Liver
- Muscle

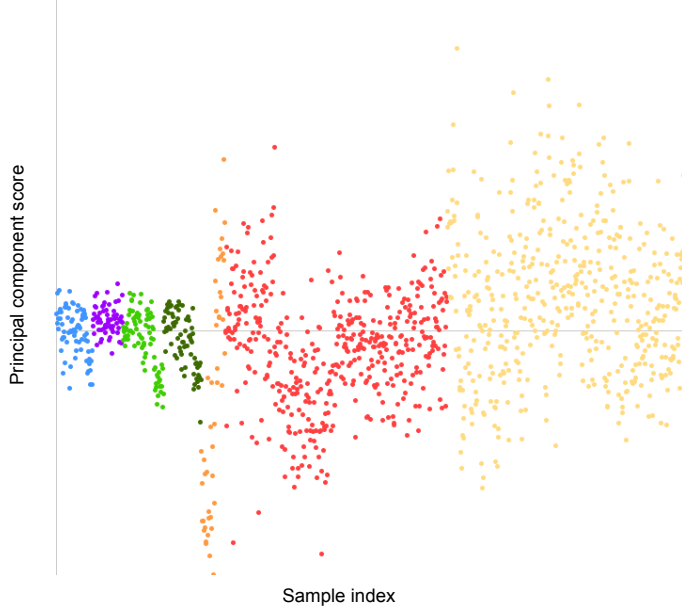

### Principal component 12

- Peripheral Blood – COPD Cohort
- Peripheral Blood – Ulcerative Colitis Cohort
- Peripheral Blood – Amyotrophic Lateral Sclerosis Cohort
- Subcutaneous Adipose
- Visceral Adipose
- Liver
- Muscle

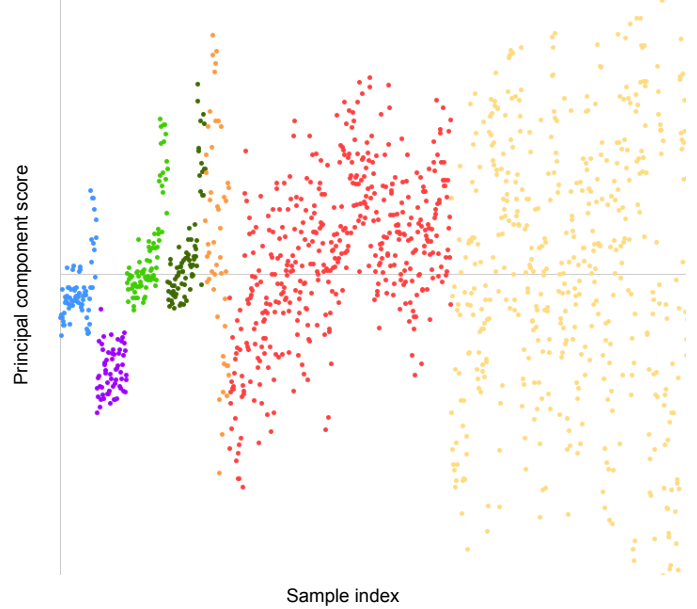

### Principal component 13

- Peripheral Blood – COPD Cohort
- Peripheral Blood – Ulcerative Colitis Cohort
- Peripheral Blood – Amyotrophic Lateral Sclerosis Cohort
- Subcutaneous Adipose
- Visceral Adipose
- Liver
- Muscle

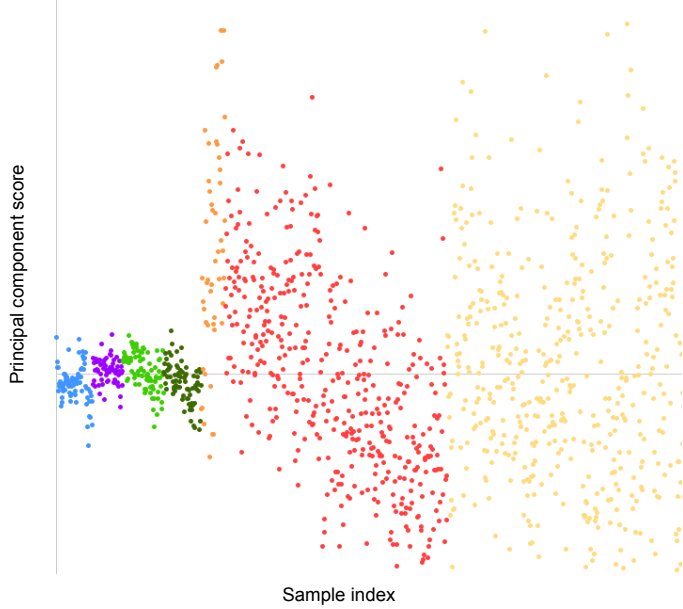

### Principal component 14

- Peripheral Blood – COPD Cohort
- Peripheral Blood – Ulcerative Colitis Cohort
- Peripheral Blood – Amyotrophic Lateral Sclerosis Cohort
- Subcutaneous Adipose
- Visceral Adipose
- Liver
- Muscle

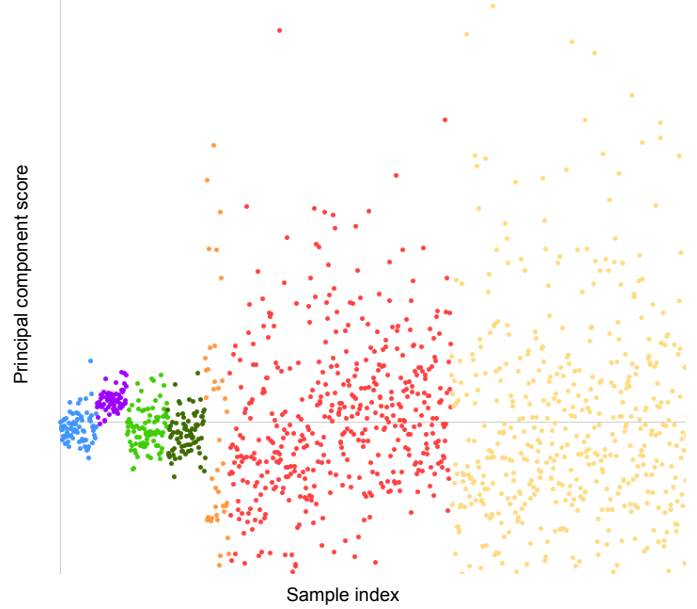

### Principal component 14

- Peripheral Blood – COPD Cohort
- Peripheral Blood – Ulcerative Colitis Cohort
- Peripheral Blood – Amyotrophic Lateral Sclerosis Cohort
- Subcutaneous Adipose
- Visceral Adipose
- Liver
- Muscle

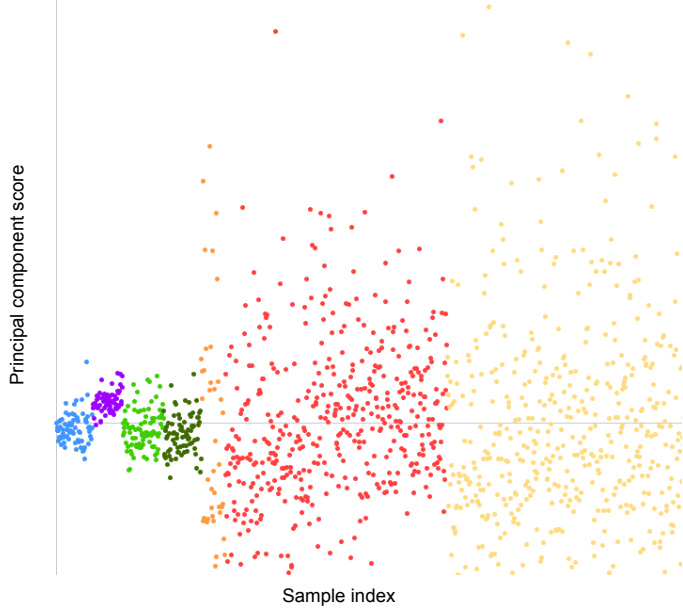

### Principal component 16

- Peripheral Blood – COPD Cohort
- Peripheral Blood – Ulcerative Colitis Cohort
- Peripheral Blood – Amyotrophic Lateral Sclerosis Cohort
- Subcutaneous Adipose
- Visceral Adipose
- Liver
- Muscle

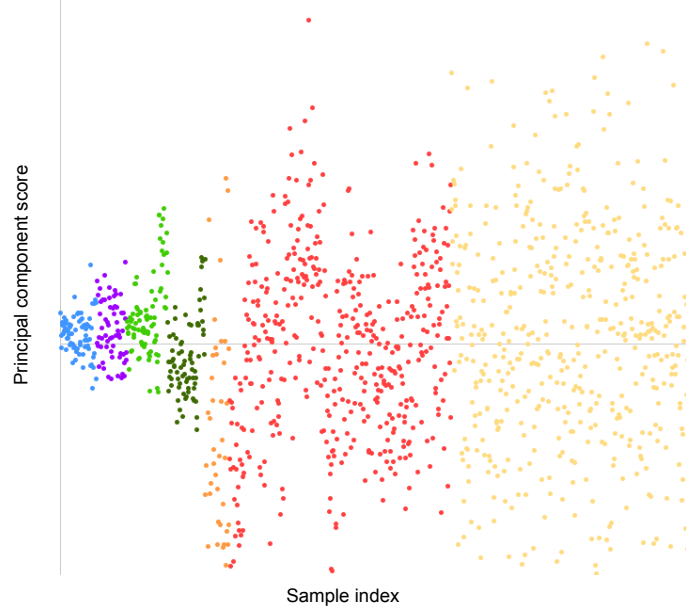

### Principal component 17

- Peripheral Blood – COPD Cohort
- Peripheral Blood – Ulcerative Colitis Cohort
- Peripheral Blood – Amyotrophic Lateral Sclerosis Cohort
- Subcutaneous Adipose
- Visceral Adipose
- Liver
- Muscle

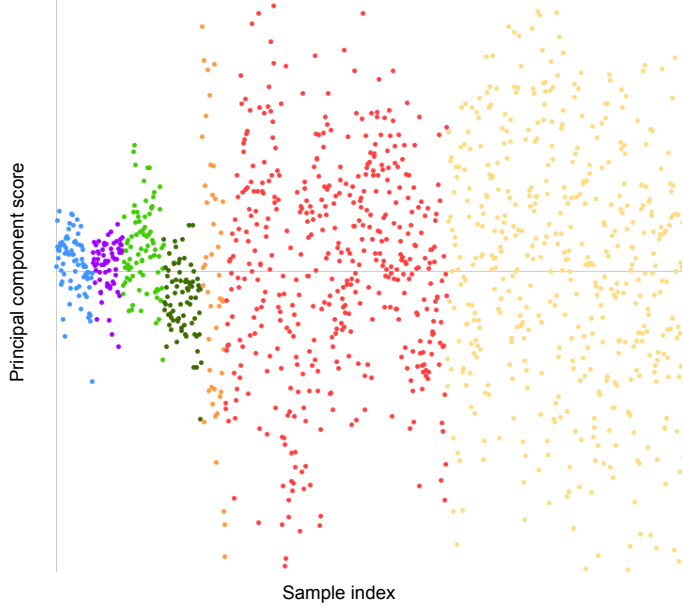

### Principal component 18

- Peripheral Blood – COPD Cohort
- Peripheral Blood – Ulcerative Colitis Cohort
- Peripheral Blood – Amyotrophic Lateral Sclerosis Cohort
- Subcutaneous Adipose
- Visceral Adipose
- Liver
- Muscle

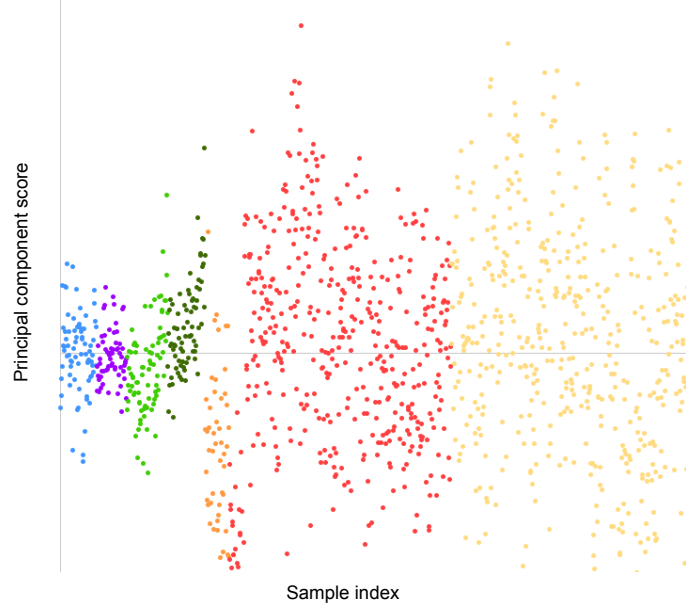

### Principal component 19

- Peripheral Blood – COPD Cohort
- Peripheral Blood – Ulcerative Colitis Cohort
- Peripheral Blood – Amyotrophic Lateral Sclerosis Cohort
- Subcutaneous Adipose
- Visceral Adipose
- Liver
- Muscle

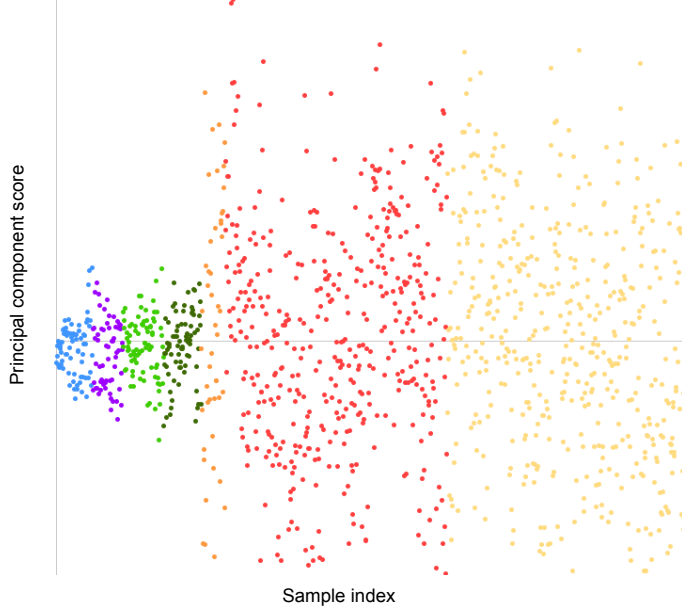

### Principal component 20

- Peripheral Blood – COPD Cohort
- Peripheral Blood – Ulcerative Colitis Cohort
- Peripheral Blood – Amyotrophic Lateral Sclerosis Cohort
- Subcutaneous Adipose
- Visceral Adipose
- Liver
- Muscle

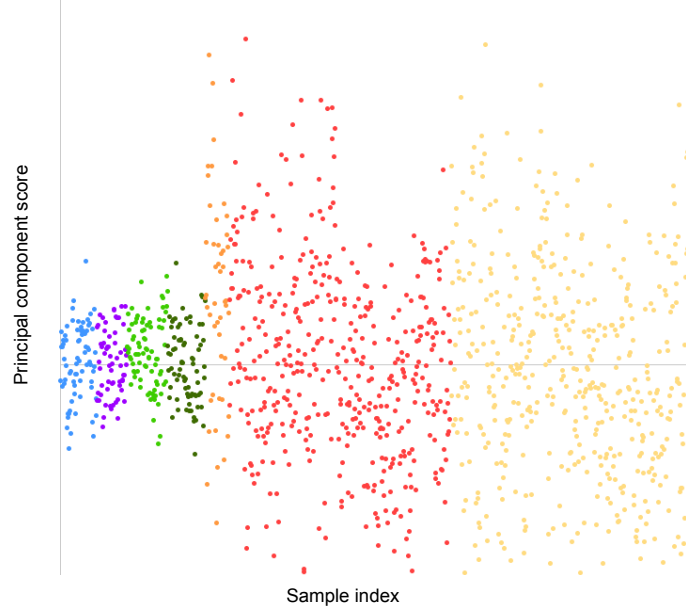

### Principal component 21

- Peripheral Blood – COPD Cohort
- Peripheral Blood – Ulcerative Colitis Cohort
- Peripheral Blood – Amyotrophic Lateral Sclerosis Cohort
- Subcutaneous Adipose
- Visceral Adipose
- Liver
- Muscle

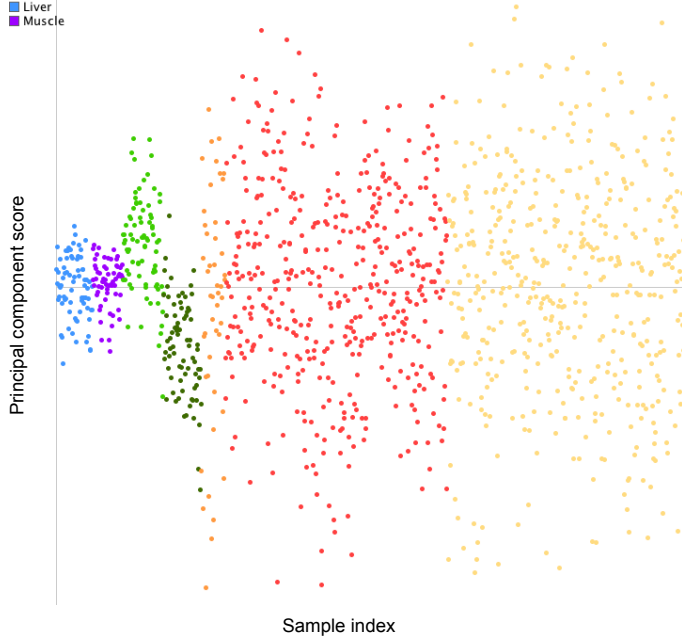

### Principal component 22

- Peripheral Blood – COPD Cohort
- Peripheral Blood – Ulcerative Colitis Cohort
- Peripheral Blood – Amyotrophic Lateral Sclerosis Cohort
- Subcutaneous Adipose
- Visceral Adipose
- Liver
- Muscle

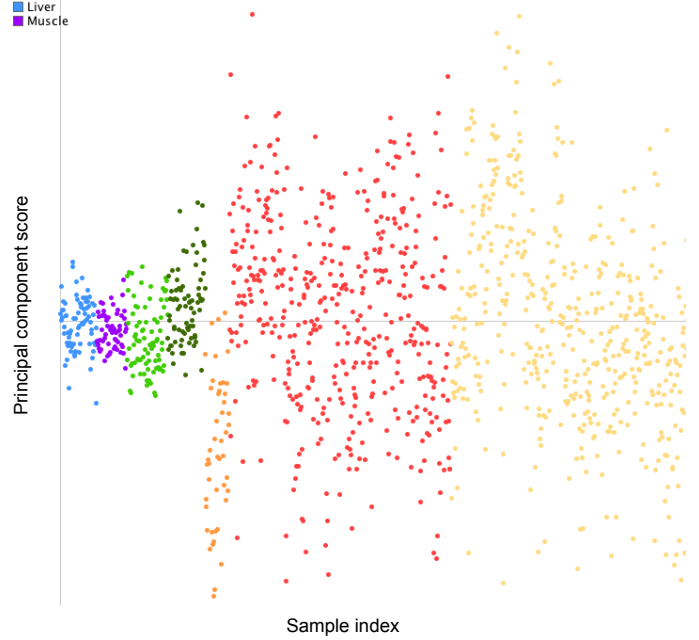

### Principal component 23

- Peripheral Blood – COPD Cohort
- Peripheral Blood – Ulcerative Colitis Cohort
- Peripheral Blood – Amyotrophic Lateral Sclerosis Cohort
- Subcutaneous Adipose
- Visceral Adipose
- Liver
- Muscle

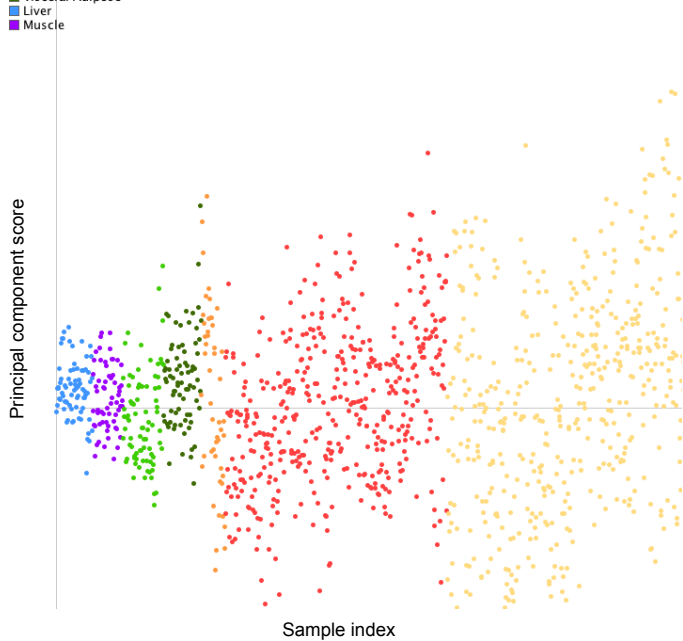

### Principal component 24

- Peripheral Blood – COPD Cohort
- Peripheral Blood – Ulcerative Colitis Cohort
- Peripheral Blood – Amyotrophic Lateral Sclerosis Cohort
- Subcutaneous Adipose
- Visceral Adipose
- Liver
- Muscle

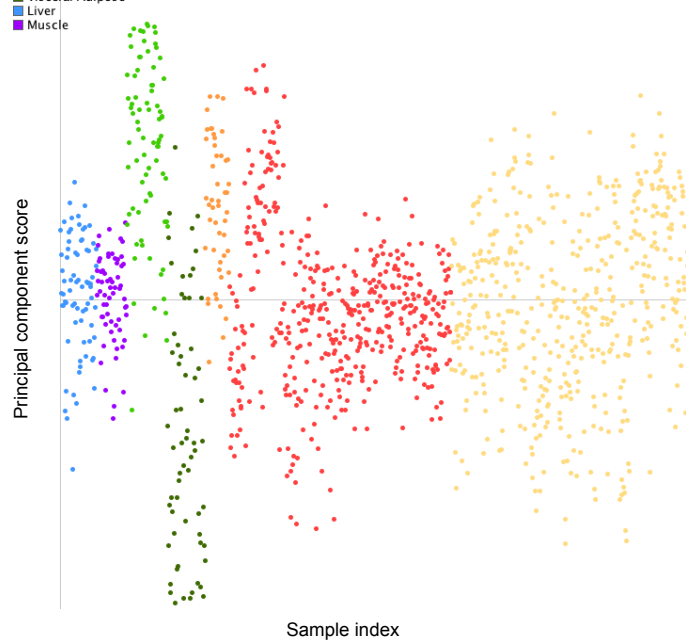

### Principal component 25

- Peripheral Blood – COPD Cohort
- Peripheral Blood – Ulcerative Colitis Cohort
- Peripheral Blood – Amyotrophic Lateral Sclerosis Cohort
- Subcutaneous Adipose
- Visceral Adipose
- Liver
- Muscle

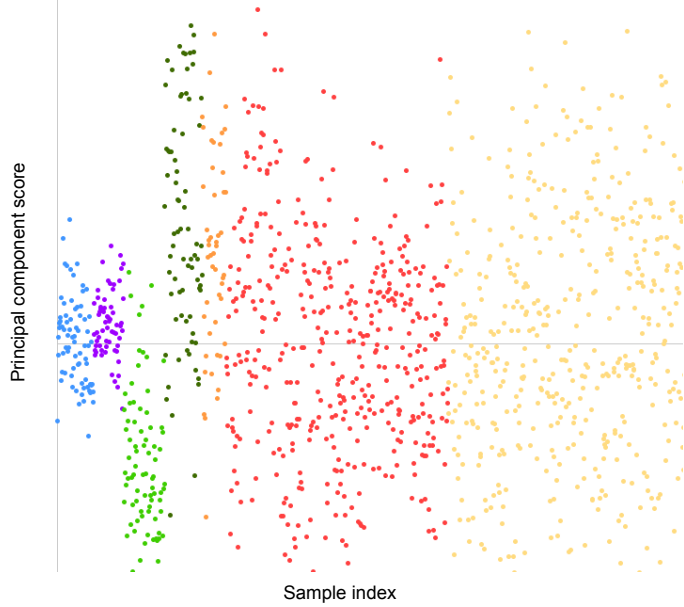

### Principal component 26

- Peripheral Blood – COPD Cohort
- Peripheral Blood – Ulcerative Colitis Cohort
- Peripheral Blood – Amyotrophic Lateral Sclerosis Cohort
- Subcutaneous Adipose
- Visceral Adipose
- Liver
- Muscle

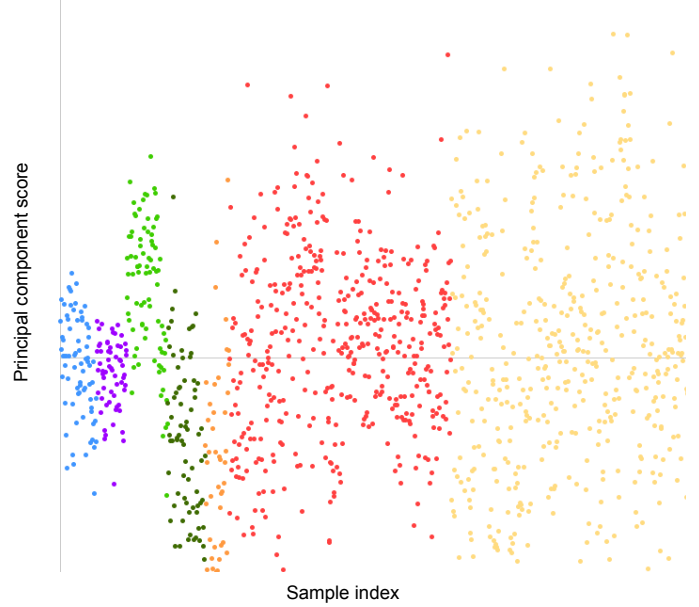

### Principal component 27

- Peripheral Blood – COPD Cohort
- Peripheral Blood – Ulcerative Colitis Cohort
- Peripheral Blood – Amyotrophic Lateral Sclerosis Cohort
- Subcutaneous Adipose
- Visceral Adipose
- Liver
- Muscle

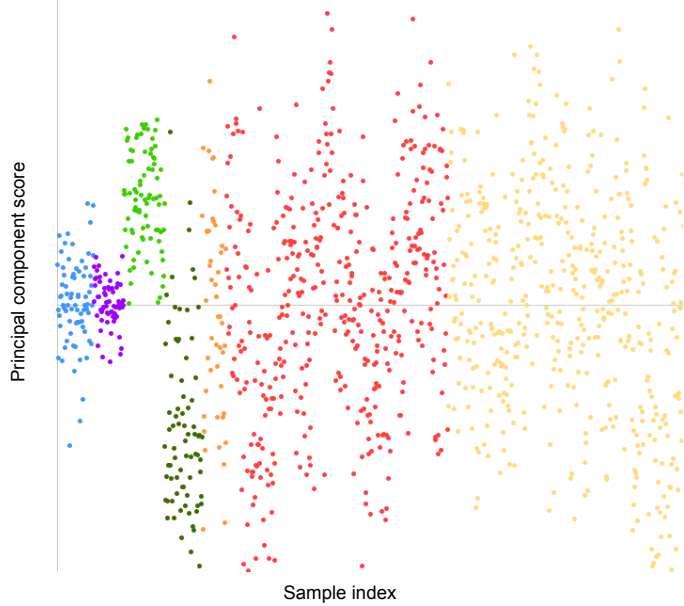

### Principal component 28

- Peripheral Blood – COPD Cohort
- Peripheral Blood – Ulcerative Colitis Cohort
- Peripheral Blood – Amyotrophic Lateral Sclerosis Cohort
- Subcutaneous Adipose
- Visceral Adipose
- Liver
- Muscle

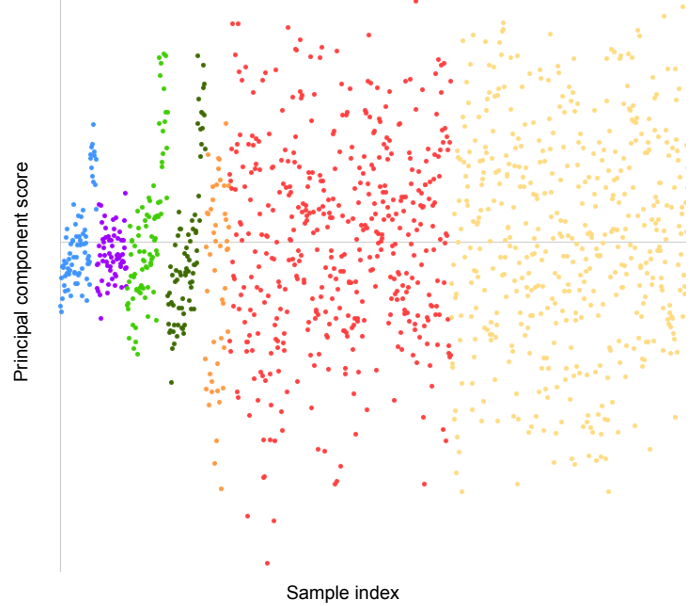

### Principal component 29

- Peripheral Blood – COPD Cohort
- Peripheral Blood – Ulcerative Colitis Cohort
- Peripheral Blood – Amyotrophic Lateral Sclerosis Cohort
- Subcutaneous Adipose
- Visceral Adipose
- Liver
- Muscle

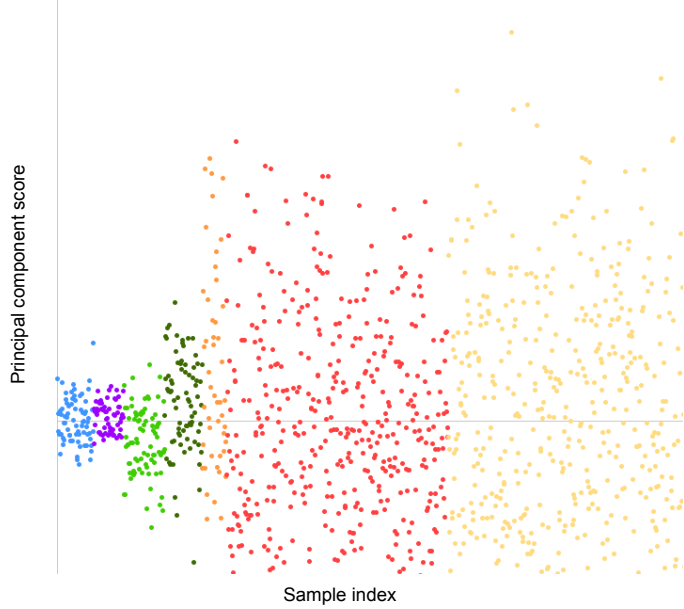

### Principal component 30

- Peripheral Blood – COPD Cohort
- Peripheral Blood – Ulcerative Colitis Cohort
- Peripheral Blood – Amyotrophic Lateral Sclerosis Cohort
- Subcutaneous Adipose
- Visceral Adipose
- Liver
- Muscle

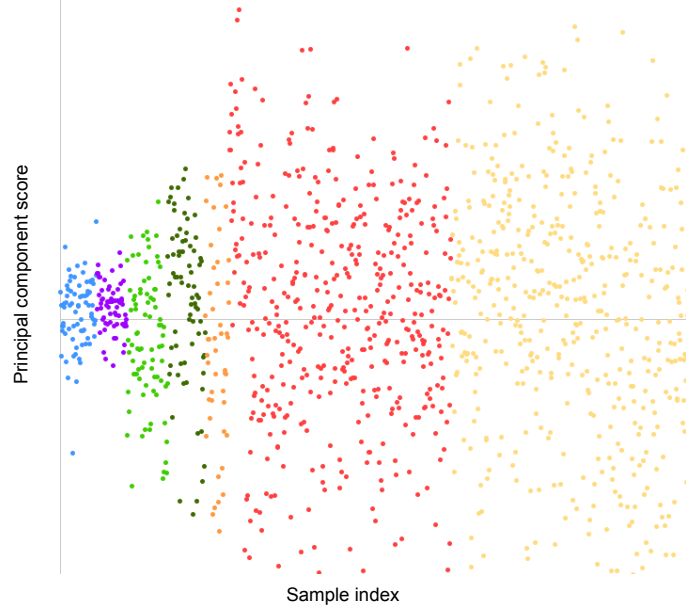

### Principal component 31

- Peripheral Blood – COPD Cohort
- Peripheral Blood – Ulcerative Colitis Cohort
- Peripheral Blood – Amyotrophic Lateral Sclerosis Cohort
- Subcutaneous Adipose
- Visceral Adipose
- Liver
- Muscle

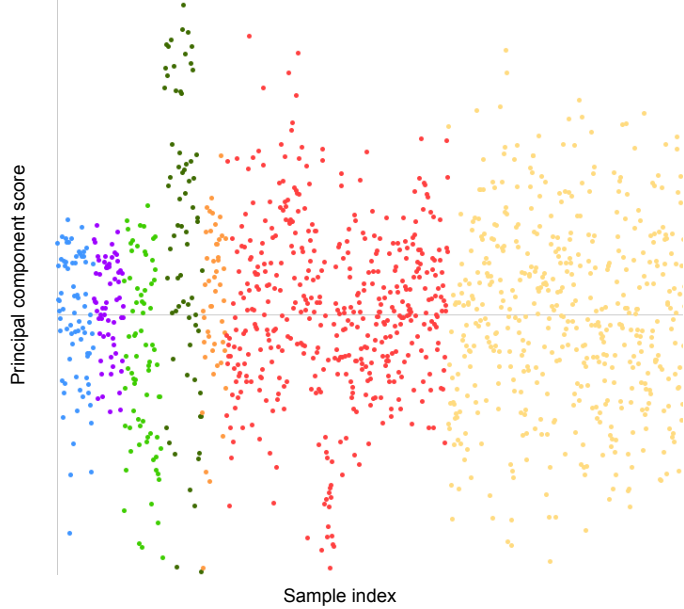

### Principal component 32

- Peripheral Blood – COPD Cohort
- Peripheral Blood – Ulcerative Colitis Cohort
- Peripheral Blood – Amyotrophic Lateral Sclerosis Cohort
- Subcutaneous Adipose
- Visceral Adipose
- Liver
- Muscle

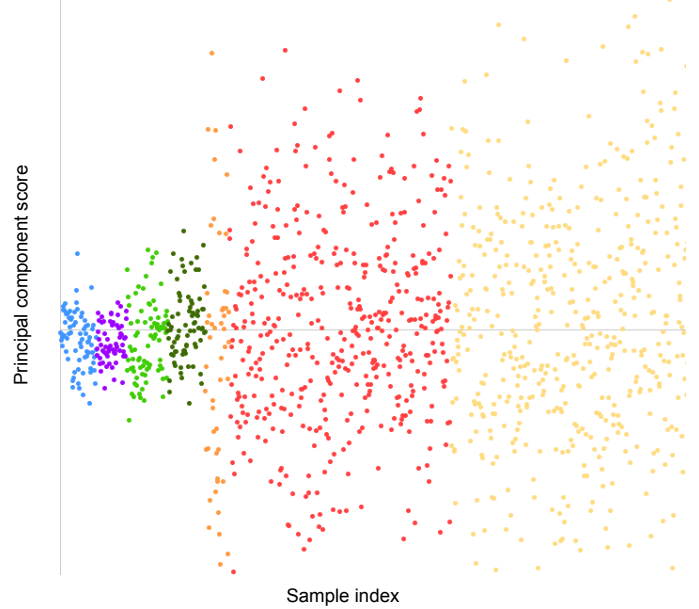



### Principal component 33

- Peripheral Blood – COPD Cohort
- Peripheral Blood – Ulcerative Colitis Cohort
- Peripheral Blood – Amyotrophic Lateral Sclerosis Cohort
- Subcutaneous Adipose
- Visceral Adipose
- Liver
- Muscle

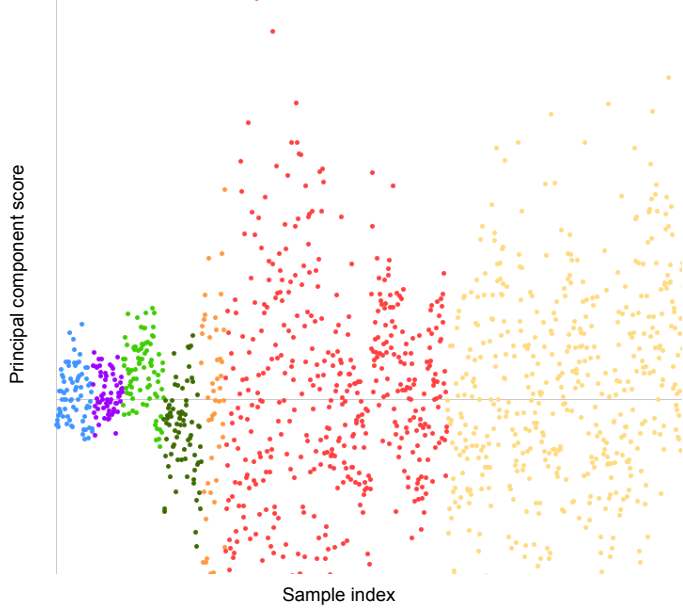

### Principal component 34

- Peripheral Blood – COPD Cohort
- Peripheral Blood – Ulcerative Colitis Cohort
- Peripheral Blood – Amyotrophic Lateral Sclerosis Cohort
- Subcutaneous Adipose
- Visceral Adipose
- Liver
- Muscle

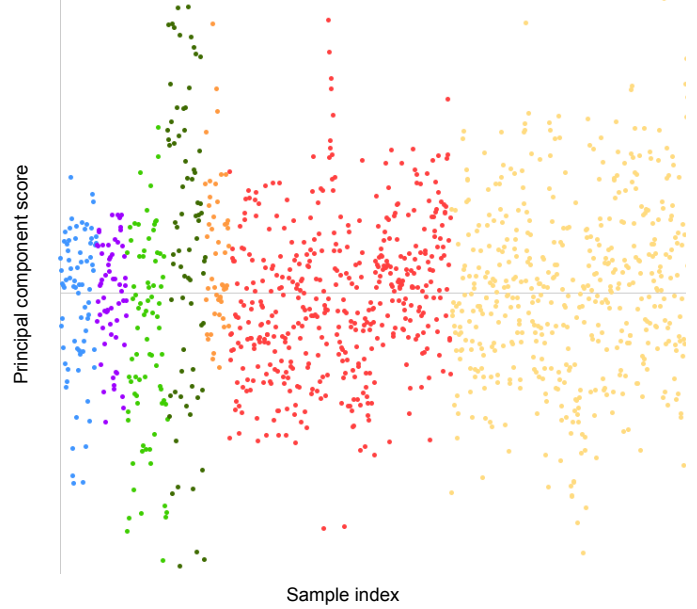

### Principal component 35

- Peripheral Blood – COPD Cohort
- Peripheral Blood – Ulcerative Colitis Cohort
- Peripheral Blood – Amyotrophic Lateral Sclerosis Cohort
- Subcutaneous Adipose
- Visceral Adipose
- Liver
- Muscle

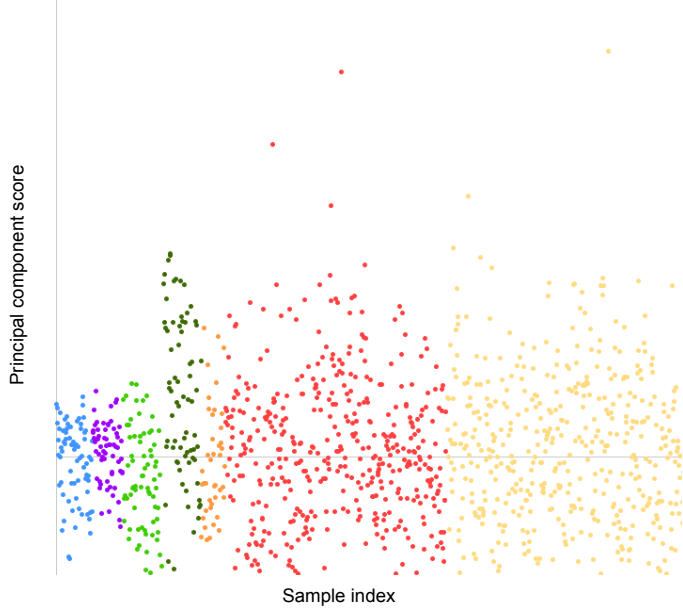

### Principal component 36

- Peripheral Blood – COPD Cohort
- Peripheral Blood – Ulcerative Colitis Cohort
- Peripheral Blood – Amyotrophic Lateral Sclerosis Cohort
- Subcutaneous Adipose
- Visceral Adipose
- Liver
- Muscle

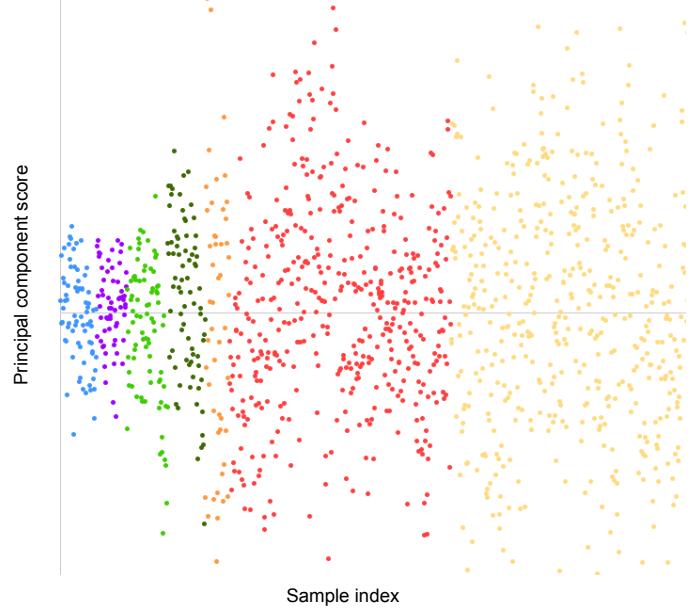

### Principal component 37

- Peripheral Blood – COPD Cohort
- Peripheral Blood – Ulcerative Colitis Cohort
- Peripheral Blood – Amyotrophic Lateral Sclerosis Cohort
- Subcutaneous Adipose
- Visceral Adipose
- Liver
- Muscle

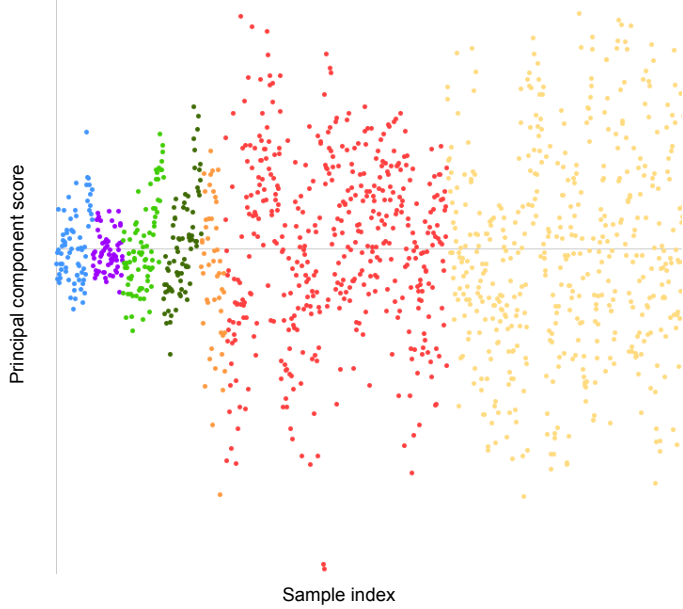

### Principal component 38

- Peripheral Blood – COPD Cohort
- Peripheral Blood – Ulcerative Colitis Cohort
- Peripheral Blood – Amyotrophic Lateral Sclerosis Cohort
- Subcutaneous Adipose
- Visceral Adipose
- Liver
- Muscle

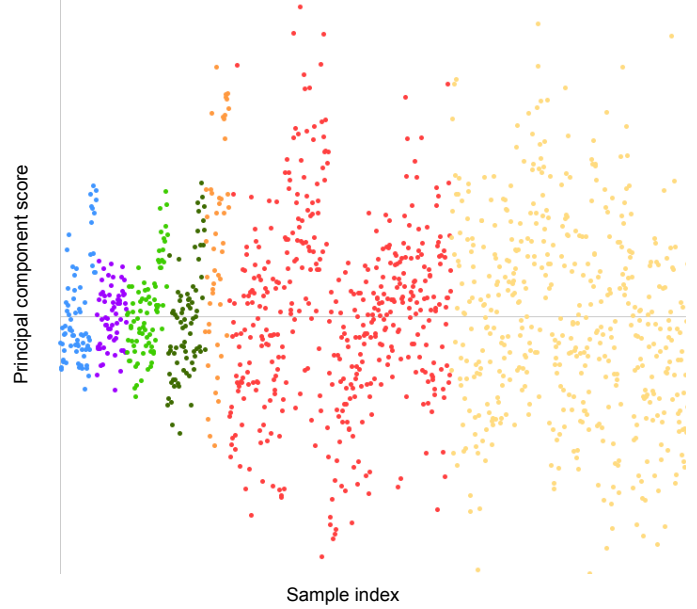

### Principal component 39

- Peripheral Blood – COPD Cohort
- Peripheral Blood – Ulcerative Colitis Cohort
- Peripheral Blood – Amyotrophic Lateral Sclerosis Cohort
- Subcutaneous Adipose
- Visceral Adipose
- Liver
- Muscle

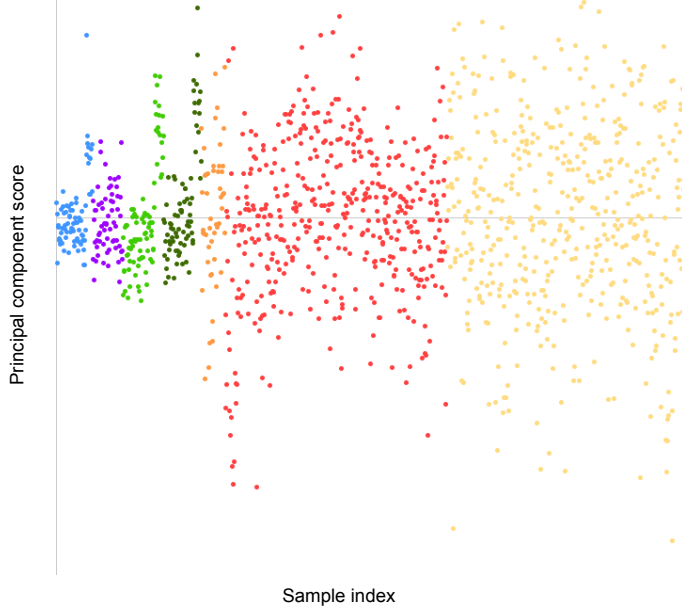

### Principal component 40

- Peripheral Blood – COPD Cohort
- Peripheral Blood – Ulcerative Colitis Cohort
- Peripheral Blood – Amyotrophic Lateral Sclerosis Cohort
- Subcutaneous Adipose
- Visceral Adipose
- Liver
- Muscle

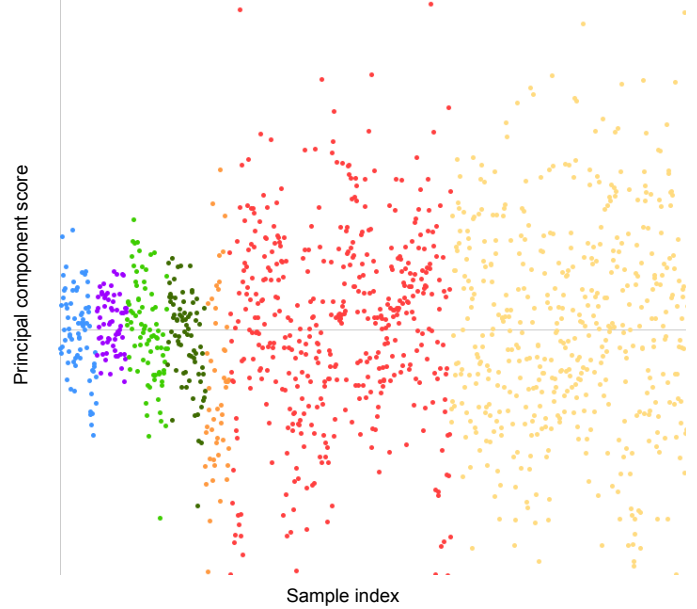

### Principal component 41

- Peripheral Blood – COPD Cohort
- Peripheral Blood – Ulcerative Colitis Cohort
- Peripheral Blood – Amyotrophic Lateral Sclerosis Cohort
- Subcutaneous Adipose
- Visceral Adipose
- Liver
- Muscle

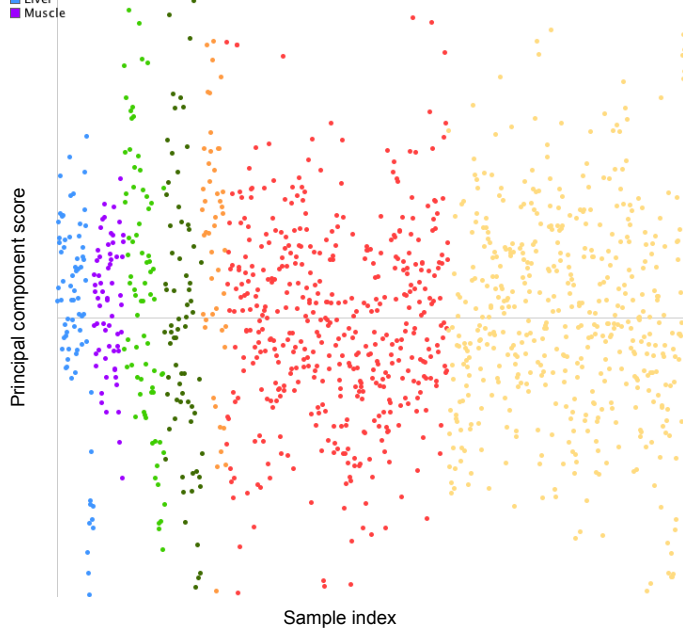

### Principal component 42

- Peripheral Blood – COPD Cohort
- Peripheral Blood – Ulcerative Colitis Cohort
- Peripheral Blood – Amyotrophic Lateral Sclerosis Cohort
- Subcutaneous Adipose
- Visceral Adipose
- Liver
- Muscle

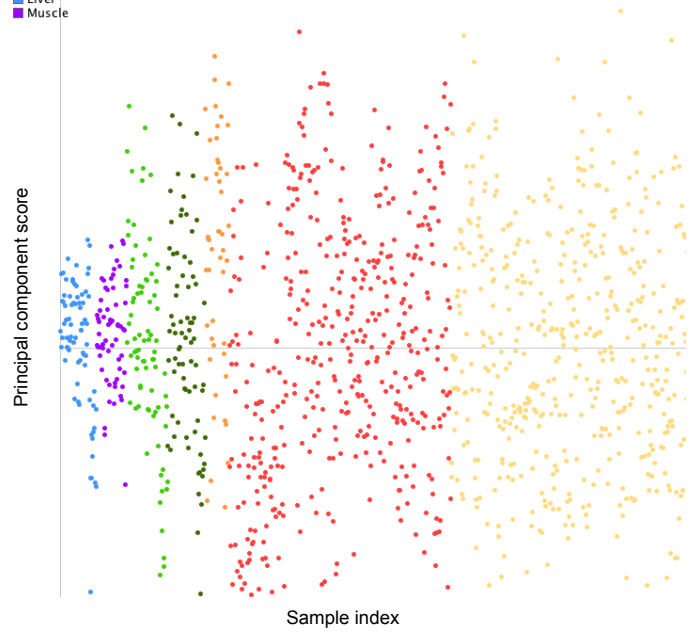

### Principal component 43

- Peripheral Blood – COPD Cohort
- Peripheral Blood – Ulcerative Colitis Cohort
- Peripheral Blood – Amyotrophic Lateral Sclerosis Cohort
- Subcutaneous Adipose
- Visceral Adipose
- Liver
- Muscle

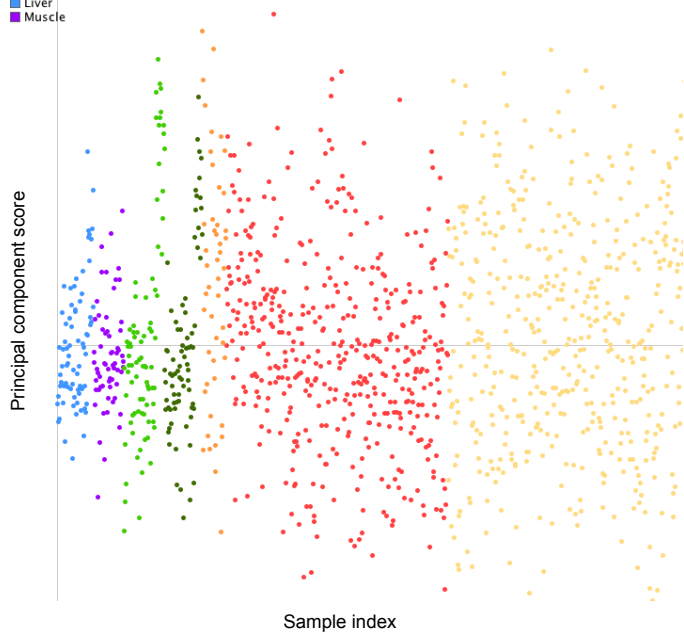

### Principal component 44

- Peripheral Blood – COPD Cohort
- Peripheral Blood – Ulcerative Colitis Cohort
- Peripheral Blood – Amyotrophic Lateral Sclerosis Cohort
- Subcutaneous Adipose
- Visceral Adipose
- Liver
- Muscle

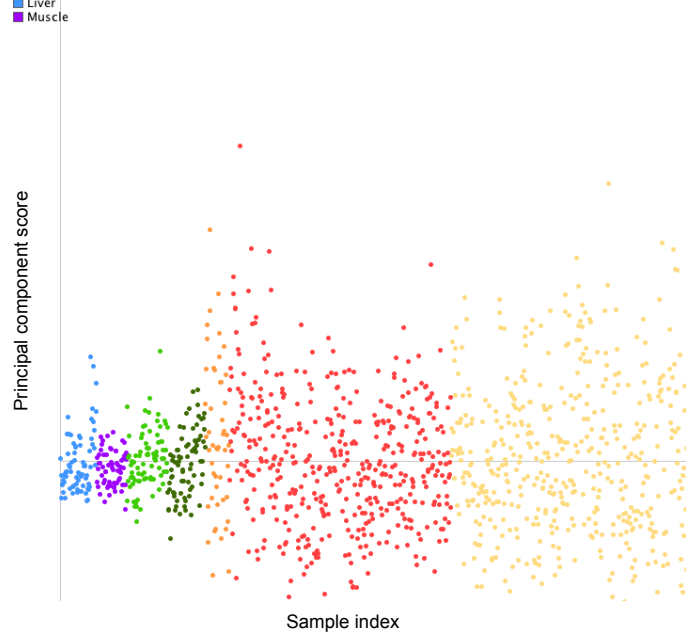

### Principal component 45

- Peripheral Blood – COPD Cohort
- Peripheral Blood – Ulcerative Colitis Cohort
- Peripheral Blood – Amyotrophic Lateral Sclerosis Cohort
- Subcutaneous Adipose
- Visceral Adipose
- Liver
- Muscle

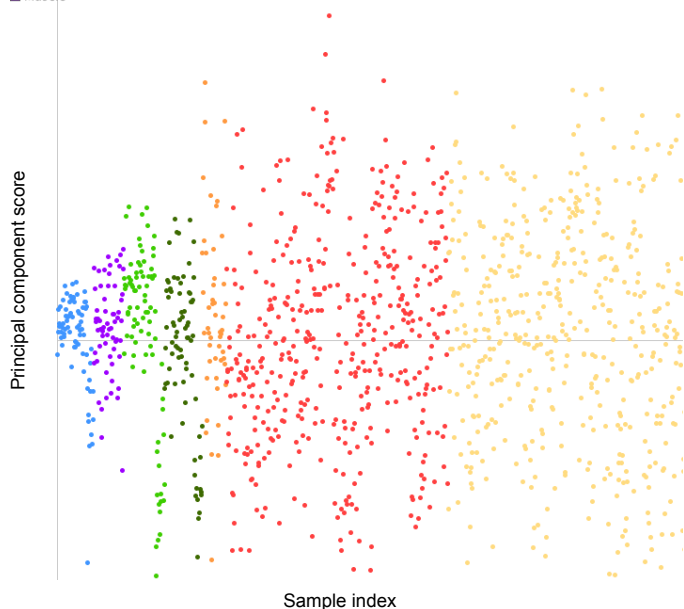

### Principal component 46

- Peripheral Blood – COPD Cohort
- Peripheral Blood – Ulcerative Colitis Cohort
- Peripheral Blood – Amyotrophic Lateral Sclerosis Cohort
- Subcutaneous Adipose
- Visceral Adipose
- Liver
- Muscle

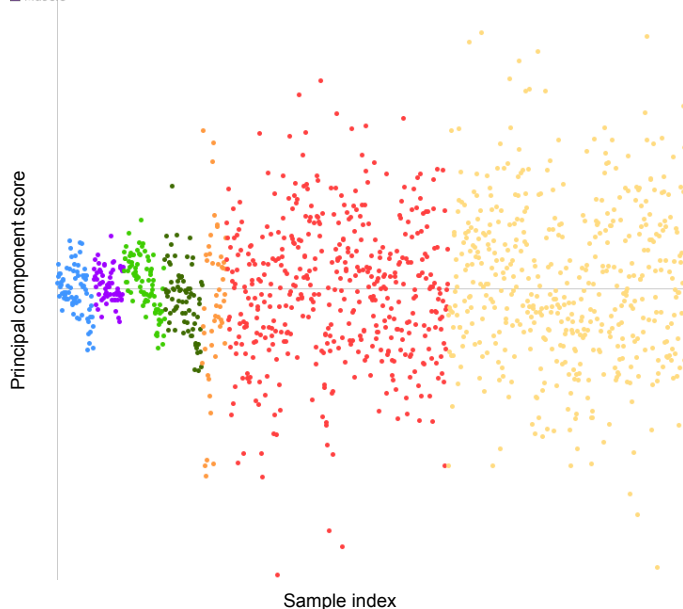

### Principal component 47

- Peripheral Blood – COPD Cohort
- Peripheral Blood – Ulcerative Colitis Cohort
- Peripheral Blood – Amyotrophic Lateral Sclerosis Cohort
- Subcutaneous Adipose
- Visceral Adipose
- Liver
- Muscle

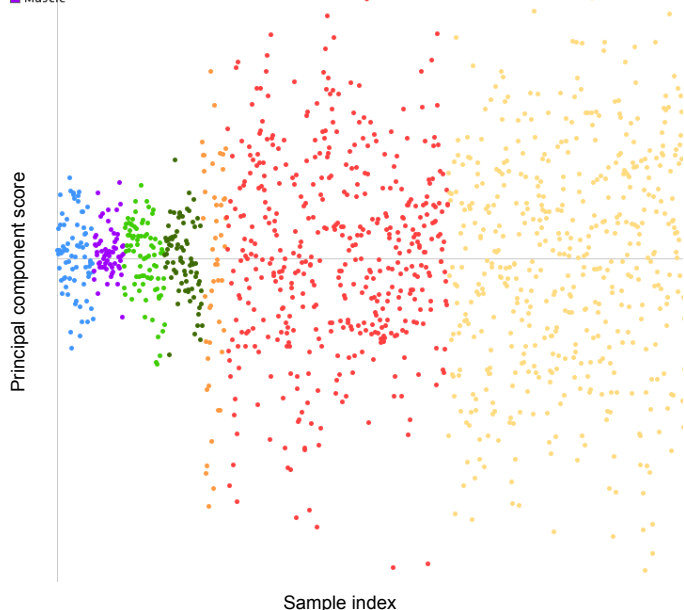

### Principal component 48

- Peripheral Blood – COPD Cohort
- Peripheral Blood – Ulcerative Colitis Cohort
- Peripheral Blood – Amyotrophic Lateral Sclerosis Cohort
- Subcutaneous Adipose
- Visceral Adipose
- Liver
- Muscle

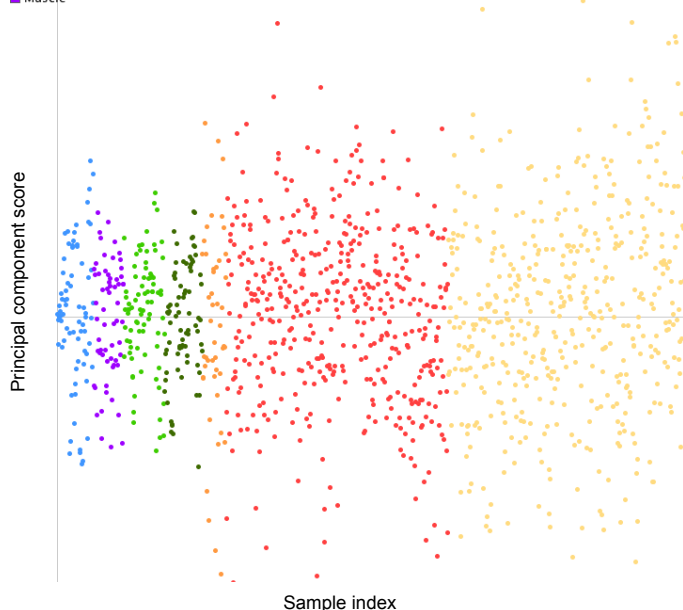

### Principal component 49

- Peripheral Blood – COPD Cohort
- Peripheral Blood – Ulcerative Colitis Cohort
- Peripheral Blood – Amyotrophic Lateral Sclerosis Cohort
- Subcutaneous Adipose
- Visceral Adipose
- Liver
- Muscle

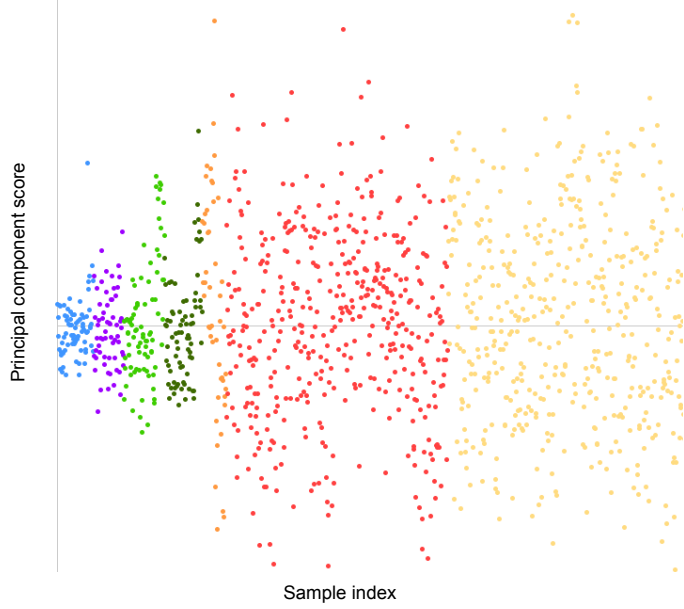

### Principal component 50

- Peripheral Blood – COPD Cohort
- Peripheral Blood – Ulcerative Colitis Cohort
- Peripheral Blood – Amyotrophic Lateral Sclerosis Cohort
- Subcutaneous Adipose
- Visceral Adipose
- Liver
- Muscle

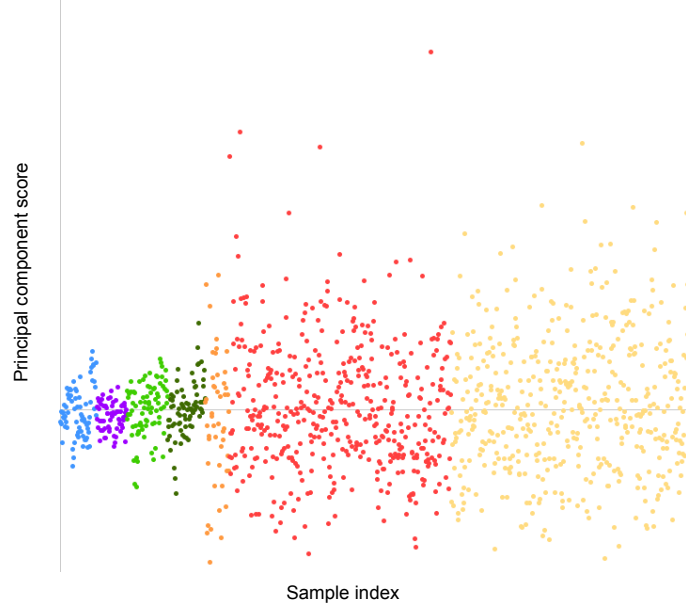

Supplement: pgen.1002197.s006.pdf [file pgen.1002197.s006.pdf]
