# Supplementary material for: Trans-eQTLs Reveal That Independent Genetic Variants Associated with a Complex Phenotype Converge on Intermediate Genes, with a Major Role for the HLA
Source: PubMed Central journal article supplement (PMC3150446; doi:10.1371/journal.pgen.1002197), 2011-08-04

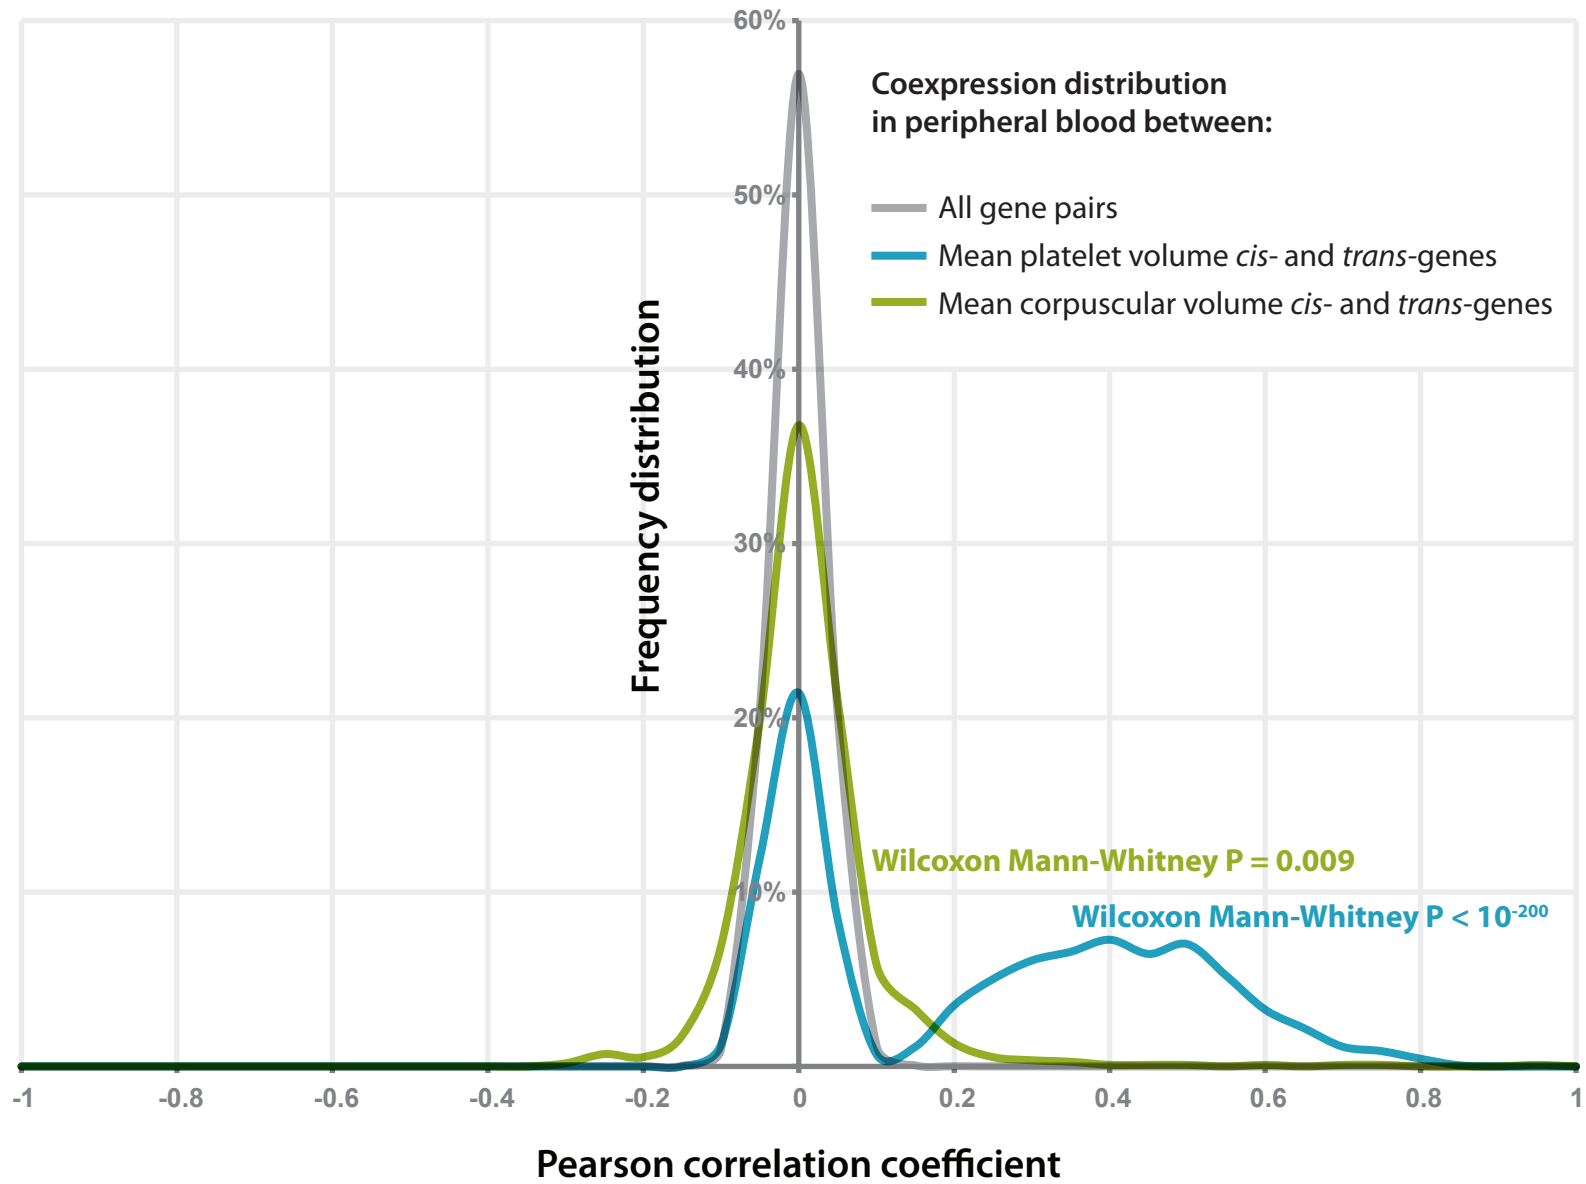

Supplement: pgen.1002197.s004.pdf [file pgen.1002197.s004.pdf]
