# Supplementary material for: Trans-eQTLs Reveal That Independent Genetic Variants Associated with a Complex Phenotype Converge on Intermediate Genes, with a Major Role for the HLA
Source: PubMed Central journal article supplement (PMC3150446; doi:10.1371/journal.pgen.1002197), 2011-08-04
Supplement: pgen.1002197.s015.pdf [file pgen.1002197.s015.pdf]

SNP rs4948068 (chr. 7, 50994688 bp)  
 Probe 3670619 (chr. 6, 113301680 - 11334609 bp), AMD1  
 P-Value 7.98E-6

HT12-Controls

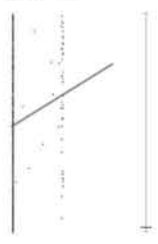

CC (369) CA (45) AA (0)  
 Corr: 0.15 R2: 0.022  
 Z-Score:3.055 P-Value:0.002

HT12-COPD

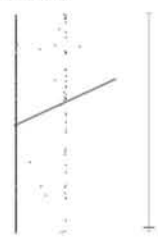

CC (405) CA (48) AA (0)  
 Corr: 0.11 R2: 0.012  
 Z-Score:2.342 P-Value:0.019

HT12-ALS

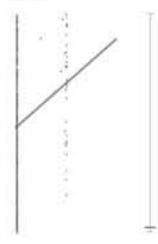

CC (290) CA (34) AA (0)  
 Corr: 0.211 R2: 0.044  
 Z-Score:3.823 P-Value:1.22E-4

HT12-UC

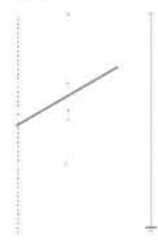

CC (44) CA (5) AA (0)  
 Corr: 0.136 R2: 0.019  
 Z-Score:0.933 P-Value:0.351

HbV2-Controls

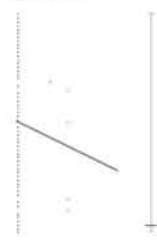

CC (54) CA (5) AA (0)  
 Corr: -0.101 R2: 0.01  
 Z-Score:-0.758 P-Value:0.448

HbV2-ColiacDisease

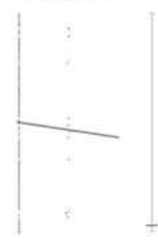

CC (100) CA (11) AA (0)  
 Corr: -0.036 R2: 0.001  
 Z-Score:-0.371 P-Value:0.711

HbV2-ALS

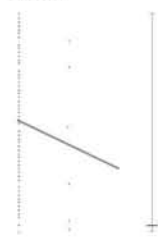

CC (53) CA (6) AA (0)  
 Corr: -0.113 R2: 0.013  
 Z-Score:-0.851 P-Value:0.395

SNP rs2517713 (chr. 6, 30092678 bp)  
 Probe 6640408 (chr. 6, 6032340 - 6601215 bp), LY86  
 P-Value 5.09E-7

HT12-Controls

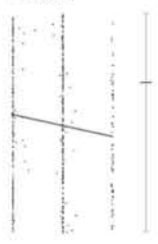

TT (150) TG (205) GG (59)  
 Corr: -0.118 R2: 0.014  
 Z-Score:-2.404 P-Value:0.016

HT12-COPD

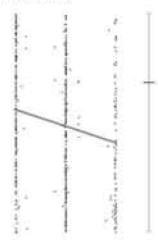

TT (182) TG (200) GG (82)  
 Corr: -0.183 R2: 0.034  
 Z-Score:-3.921 P-Value:8.82E-5

HT12-ALS

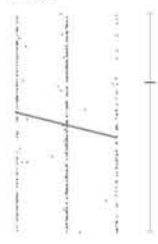

TT (98) TG (170) GG (56)  
 Corr: -0.134 R2: 0.018  
 Z-Score:-2.405 P-Value:0.016

HT12-UC

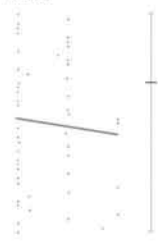

TT (27) TG (17) GG (5)  
 Corr: 0.08 R2: 0.006  
 Z-Score:0.544 P-Value:0.587

HbV2-Controls

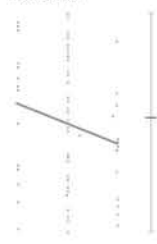

TT (14) TG (32) GG (13)  
 Corr: -0.213 R2: 0.045  
 Z-Score:-1.617 P-Value:0.106

HbV2-ColiacDisease

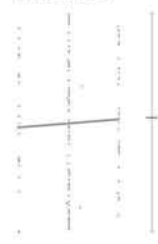

TT (20) TG (62) GG (29)  
 Corr: 0.043 R2: 0.002  
 Z-Score:0.444 P-Value:0.657

HbV2-ALS

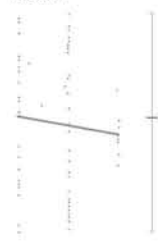

TT (23) TG (26) GG (8)  
 Corr: -0.092 R2: 0.009  
 Z-Score:-0.696 P-Value:0.486

SNP rs3003662 (chr. 16, 51143842 bp)  
 Probe 4830343 (chr. 16, 45280059 - 45290806 bp), OHC6L  
 P-Value 4.12E-7

HT12-Controls

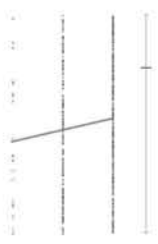

AA (20) AG (157) GG (237)  
 Corr: 0.106 R2: 0.011  
 Z-Score:2.156 P-Value:0.031

HT12-COPD

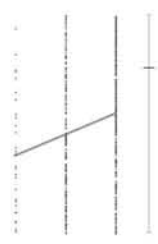

AA (28) AG (176) GG (249)  
 Corr: 0.208 R2: 0.043  
 Z-Score:4.453 P-Value:8.48E-6

HT12-ALS

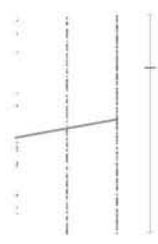

AA (17) AG (120) GG (177)  
 Corr: 0.082 R2: 0.007  
 Z-Score:1.478 P-Value:0.139

HT12-UC

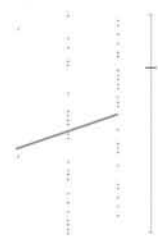

AA (2) AG (23) GG (24)  
 Corr: 0.148 R2: 0.022  
 Z-Score:1.018 P-Value:0.309

HbV2-Controls

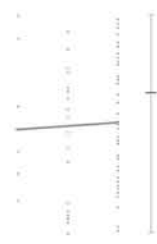

AA (6) AG (18) GG (35)  
 Corr: 0.038 R2: 0.001  
 Z-Score:0.289 P-Value:0.773

HbV2-ColiacDisease

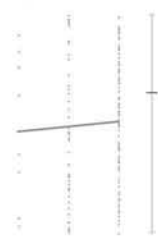

AA (8) AG (37) GG (96)  
 Corr: 0.05 R2: 0.002  
 Z-Score:0.518 P-Value:0.604

HbV2-ALS

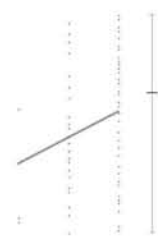

AA (3) AG (22) GG (34)  
 Corr: 0.237 R2: 0.056  
 Z-Score:1.606 P-Value:0.071

SNP rs2922239 (chr. 12, 54768447 bp)  
 Probe 3180671 (chr. 19, 1191749 - 1196823 bp), ATP5D  
 P-Value 4.11E-7

HT12-Controls

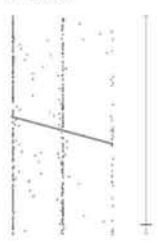

GG (196) GT (180) TT (38)  
 Corr: -0.134 R2: 0.018  
 Z-Score:-2.726 P-Value:0.006

HT12-COPD

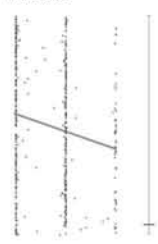

GG (198) GT (206) TT (40)  
 Corr: -0.181 R2: 0.033  
 Z-Score:-3.885 P-Value:1.03E-4

HT12-ALS

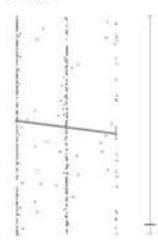

GG (144) GT (147) TT (33)  
 Corr: -0.096 R2: 0.004  
 Z-Score:-1.178 P-Value:0.239

HT12-UC

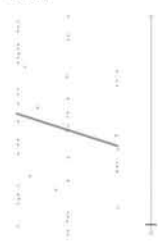

GG (23) GT (17) TT (9)  
 Corr: -0.182 R2: 0.033  
 Z-Score:-1.254 P-Value:0.21

HbV2-Controls

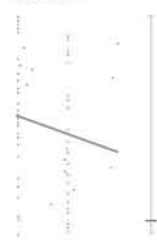

GG (30) GT (29) TT (3)  
 Corr: -0.162 R2: 0.026  
 Z-Score:-1.227 P-Value:0.22

HbV2-ColiacDisease

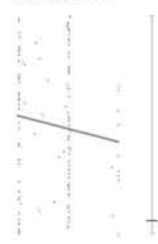

GG (44) GT (55) TT (12)  
 Corr: -0.129 R2: 0.017  
 Z-Score:-1.352 P-Value:0.176

HbV2-ALS

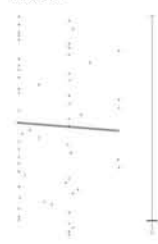

GG (28) GT (26) TT (5)  
 Corr: -0.041 R2: 0.002  
 Z-Score:-0.31 P-Value:0.756

SNP rs9271306 (chr. 6, 32684832 bp)  
 Probe 2640389 (chr. 6, 159105766 - 159161432 bp), VIL2  
 P-Value 4.06E-7

HT12-Controls

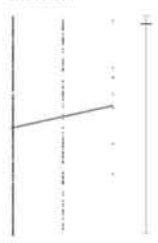

AA (316) AG (90) GG (0)  
 Corr: 0.085 R2: 0.007  
 Z-Score:1.726 P-Value:0.084

HT12-COPD

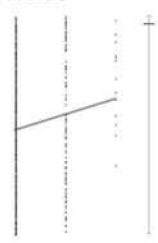

AA (342) AG (98) GG (13)  
 Corr: 0.122 R2: 0.015  
 Z-Score:2.6 P-Value:0.009

HT12-ALS

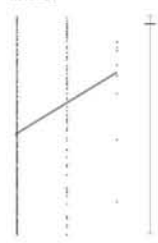

AA (299) AG (75) GG (10)  
 Corr: 0.251 R2: 0.063  
 Z-Score:4.582 P-Value:4.6E-6

HT12-UC

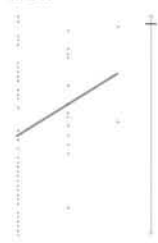

AA (34) AG (13) GG (2)  
 Corr: 0.27 R2: 0.073  
 Z-Score:1.879 P-Value:0.06

HbV2-Controls

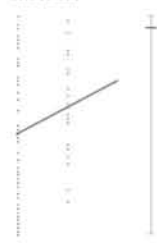

AA (40) AG (19) GG (0)  
 Corr: 0.192 R2: 0.037  
 Z-Score:1.455 P-Value:0.146

HbV2-ColiacDisease

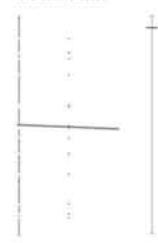

AA (97) AG (14) GG (0)  
 Corr: -0.01 R2: 0  
 Z-Score:-0.106 P-Value:0.916

HbV2-ALS

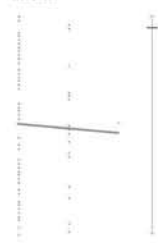

AA (42) AG (16) GG (1)  
 Corr: 0.032 R2: 0.001  
 Z-Score:0.241 P-Value:0.809

SNP rs1245738 (chr. 3, 56840616 bp)  
Probe 5670138 (chr. 12, 5997301 - 6105097 bp), VWF  
P-Value 3.89E-7

HT12-Controls

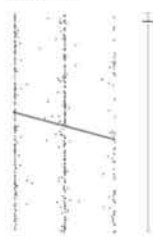

GG (153) GA (194) AA (67)  
Corr: -0.146 R2: 0.021  
Z-Score: 2.975 P-Value: 0.003

HT12-COPD

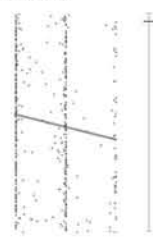

GG (202) GA (200) AA (51)  
Corr: -0.13 R2: 0.017  
Z-Score: 2.765 P-Value: 0.006

HT12-ALS

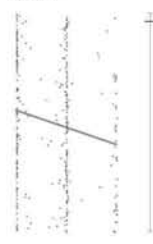

GG (132) GA (148) AA (44)  
Corr: -0.178 R2: 0.032  
Z-Score: 3.222 P-Value: 0.001

HT12-UC

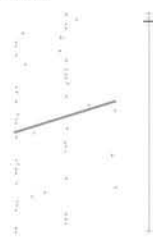

GG (24) GA (22) AA (3)  
Corr: 0.142 R2: 0.02  
Z-Score: 0.971 P-Value: 0.331

HBv2-Controls

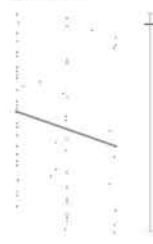

GG (28) GA (21) AA (10)  
Corr: -0.195 R2: 0.036  
Z-Score: 1.478 P-Value: 0.139

HBv2-CeliacDisease

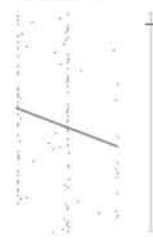

GG (41) GA (57) AA (113)  
Corr: -0.188 R2: 0.035  
Z-Score: 1.972 P-Value: 0.049

HBv2-ALS

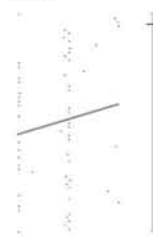

GG (20) GA (32) AA (7)  
Corr: 0.143 R2: 0.02  
Z-Score: 1.077 P-Value: 0.281

SNP rs1245738 (chr. 3, 56840616 bp)  
Probe 1070450 (chr. 9, 12417050 - 12419892 bp), PTGS1  
P-Value 3.29E-7

HT12-Controls

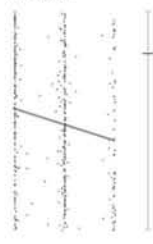

GG (153) GA (194) AA (67)  
Corr: -0.189 R2: 0.029  
Z-Score: 3.457 P-Value: 5.46E-4

HT12-COPD

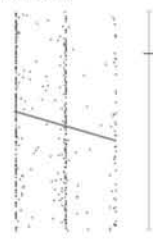

GG (202) GA (200) AA (51)  
Corr: -0.152 R2: 0.023  
Z-Score: 3.248 P-Value: 0.001

HT12-ALS

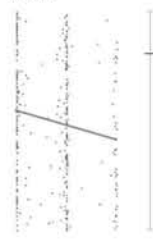

GG (132) GA (148) AA (44)  
Corr: -0.149 R2: 0.022  
Z-Score: 2.678 P-Value: 0.007

HT12-UC

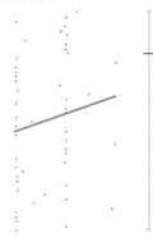

GG (24) GA (22) AA (3)  
Corr: 0.164 R2: 0.027  
Z-Score: 1.125 P-Value: 0.261

HBv2-Controls  
eQTL not available  
Probe not present.

HBv2-CeliacDisease  
eQTL not available  
Probe not present.

HBv2-ALS  
eQTL not available  
Probe not present.

SNP rs11887534 (chr. 2, 43919751 bp)  
Probe 3120368 (chr. 3, 8910358 - 9634079 bp), IL17RE  
P-Value 2.79E-7

HT12-Controls

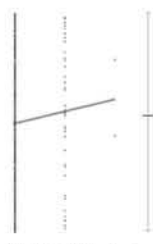

GG (373) GC (29) CC (2)  
Corr: 0.06 R2: 0.004  
Z-Score: 1.214 P-Value: 0.225

HT12-COPD

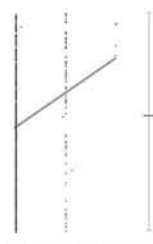

GG (381) GC (68) CC (4)  
Corr: 0.218 R2: 0.047  
Z-Score: 4.674 P-Value: 2.95E-6

HT12-ALS

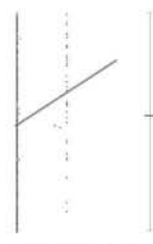

GG (289) GC (35) CC (0)  
Corr: 0.159 R2: 0.025  
Z-Score: 2.674 P-Value: 0.004

HT12-UC

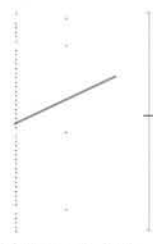

GG (45) GC (4) CC (0)  
Corr: 0.1 R2: 0.01  
Z-Score: 0.685 P-Value: 0.494

HBv2-Controls  
eQTL not available  
Probe not present.

HBv2-CeliacDisease  
eQTL not available  
Probe not present.

HBv2-ALS  
eQTL not available  
Probe not present.

SNP rs2523283 (chr. 6, 29613638 bp)  
Probe 2000128 (chr. 1, 20534320 - 20538599 bp), C4BPA  
P-Value 2.44E-7

HT12-Controls

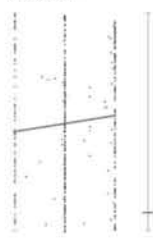

GG (72) GA (190) AA (140)  
Corr: 0.087 R2: 0.008  
Z-Score: 1.767 P-Value: 0.077

HT12-COPD

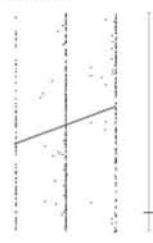

GG (75) GA (221) AA (157)  
Corr: 0.203 R2: 0.041  
Z-Score: 4.361 P-Value: 1.29E-5

HT12-ALS

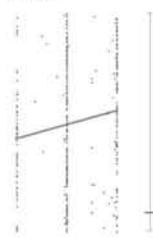

GG (53) GA (158) AA (113)  
Corr: 0.15 R2: 0.023  
Z-Score: 2.709 P-Value: 0.007

HT12-UC

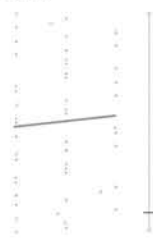

GG (18) GA (20) AA (11)  
Corr: 0.065 R2: 0.004  
Z-Score: 0.442 P-Value: 0.659

HBv2-Controls

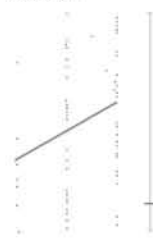

GG (7) GA (25) AA (27)  
Corr: 0.298 R2: 0.089  
Z-Score: 2.292 P-Value: 0.022

HBv2-CeliacDisease

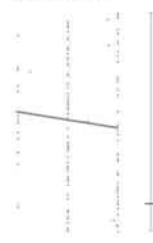

GG (14) GA (54) AA (43)  
Corr: -0.083 R2: 0.007  
Z-Score: -0.863 P-Value: 0.388

HBv2-ALS

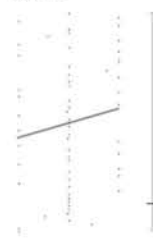

GG (12) GA (32) AA (15)  
Corr: 0.154 R2: 0.024  
Z-Score: 1.162 P-Value: 0.245

SNP rs2517713 (chr. 6, 30020078 bp)  
Probe 1500149 (chr. 22, 38124692 - 38164078 bp), MAP3K7P1  
P-Value 2.07E-7

HT12-Controls

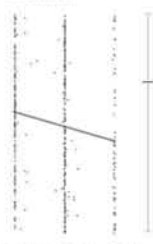

TT (150) TG (205) GG (59)  
Corr: -0.156 R2: 0.024  
Z-Score: 3.187 P-Value: 0.001

HT12-COPD

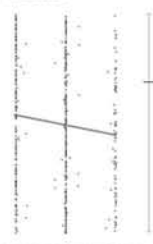

TT (162) TG (209) GG (82)  
Corr: -0.114 R2: 0.013  
Z-Score: 2.427 P-Value: 0.015

HT12-ALS

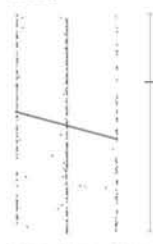

TT (98) TG (170) GG (56)  
Corr: -0.143 R2: 0.02  
Z-Score: 2.569 P-Value: 0.01

HT12-UC

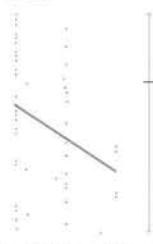

TT (27) TG (17) GG (5)  
Corr: -0.333 R2: 0.111  
Z-Score: 2.341 P-Value: 0.019

HBv2-Controls

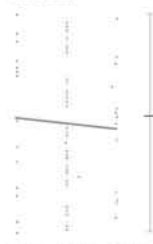

TT (14) TG (32) GG (13)  
Corr: -0.058 R2: 0.003  
Z-Score: -0.435 P-Value: 0.663

HBv2-CeliacDisease

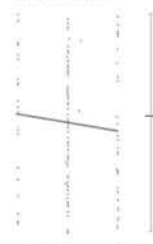

TT (20) TG (82) GG (29)  
Corr: -0.087 R2: 0.007  
Z-Score: -0.903 P-Value: 0.367

HBv2-ALS

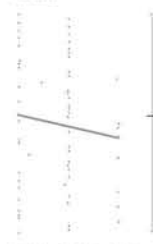

TT (29) TG (28) GG (8)  
Corr: -0.119 R2: 0.014  
Z-Score: -0.897 P-Value: 0.37

SNP rs313263 (chr. 6, 32497626 bp)  
 Probe 2940424 (chr. 7, 36518135 - 36731593 bp), AOH1  
 P-Value 2.08E-7

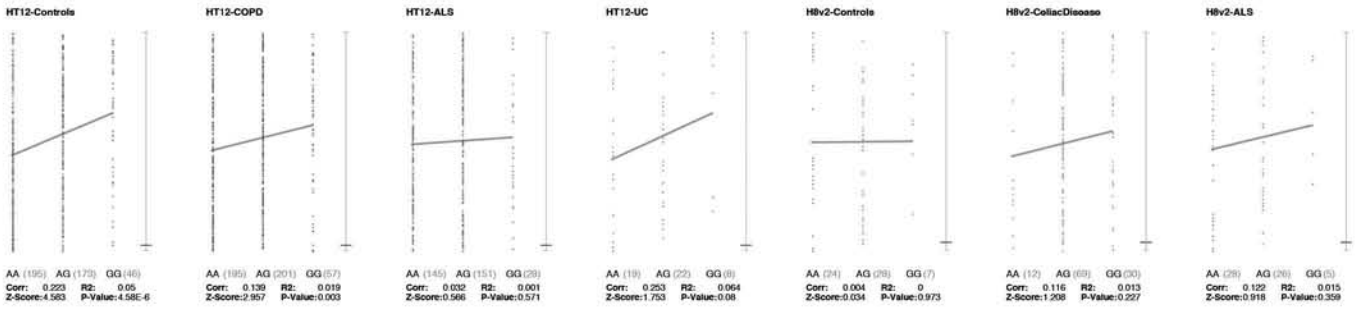

SNP rs1701704 (chr. 12, 54688754 bp)  
 Probe 3190671 (chr. 19, 1191749 - 1196823 bp), ATP5D  
 P-Value 2.05E-7

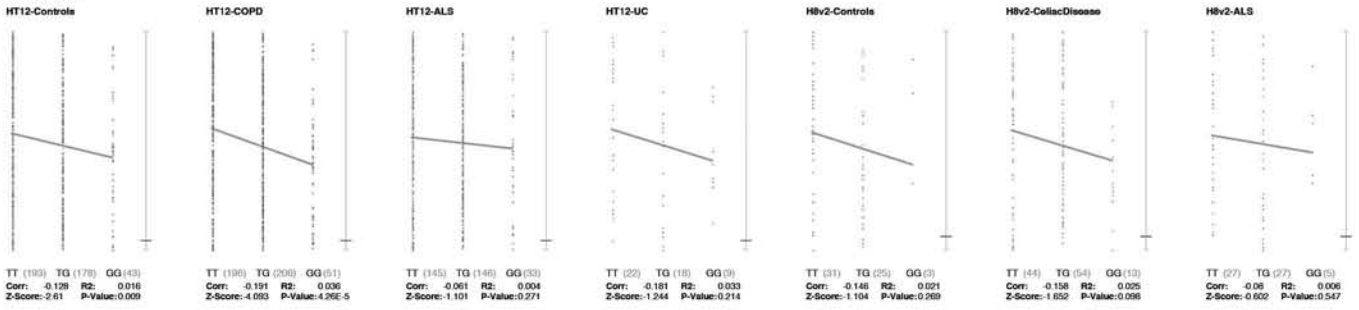

SNP rs2523333 (chr. 6, 29613638 bp)  
 Probe 6640406 (chr. 6, 6523240 - 6601215 bp), LY6E  
 P-Value 2.06E-7

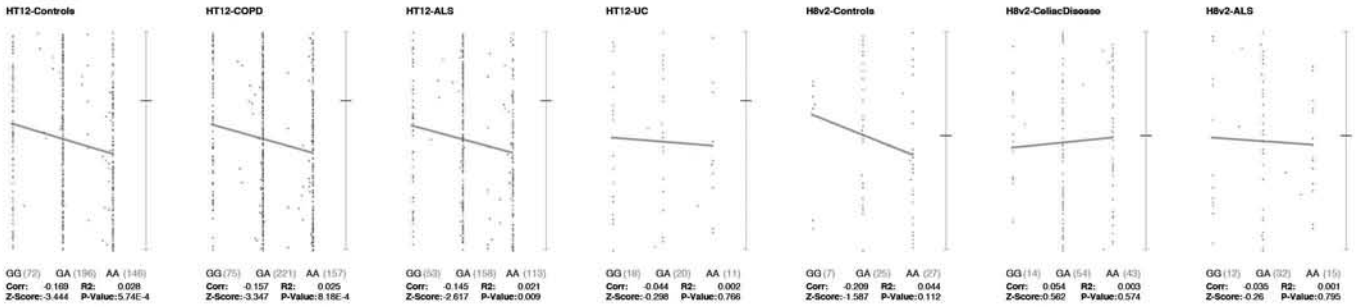

SNP rs4307868 (chr. 11, 133072195 bp)  
 Probe Human\_RefSeq-v2\_4730132 (chr. 12, 38434090 - 38787158 bp), SLC2A13  
 P-Value 2.01E-7

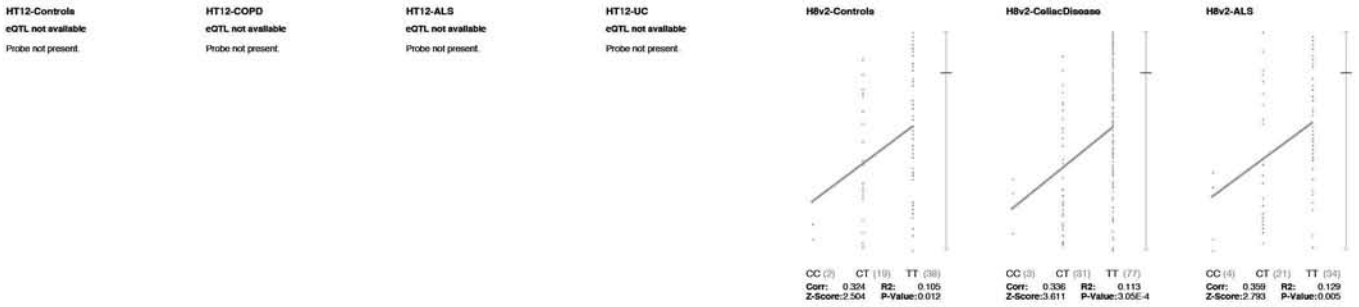

SNP rs2647044 (chr. 6, 32775888 bp)  
 Probe 1110300 (chr. 4, 19376727 - 193821641 bp), TMEM154  
 P-Value 1.75E-7

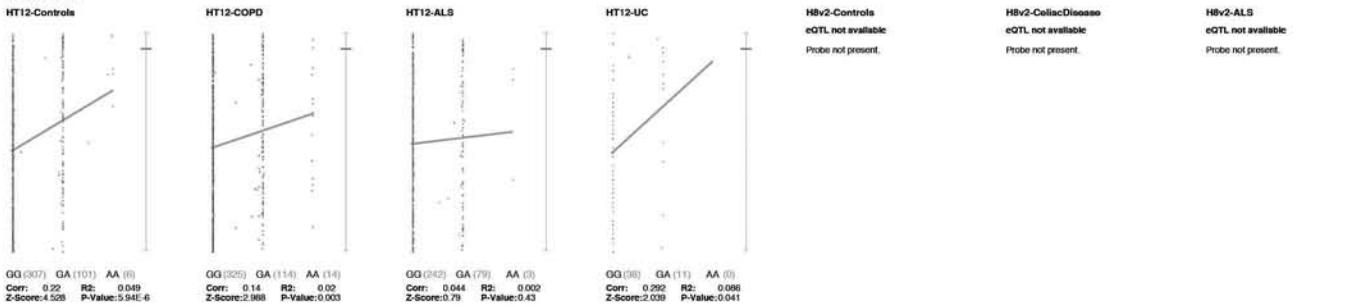

SNP rs1245738 (chr. 3, 56840616 bp)  
Probe 5610605 (chr. 15, 37659572 - 37662845 tel), THBS1  
P-Value 1.7E-7

HT12-Controls

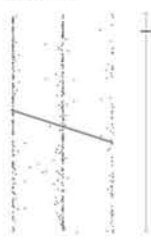

GG (153) GA (194) AA (67)  
Corr: -0.174 R2: 0.03  
Z-Score: -3.564 P-Value: 3.65E-4

HT12-COPD

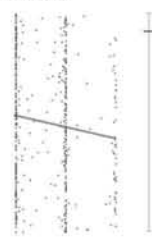

GG (202) GA (200) AA (51)  
Corr: -0.121 R2: 0.015  
Z-Score: -2.585 P-Value: 0.01

HT12-ALS

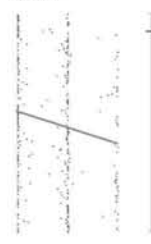

GG (132) GA (148) AA (44)  
Corr: -0.168 R2: 0.028  
Z-Score: -3.029 P-Value: 0.002

HT12-UC

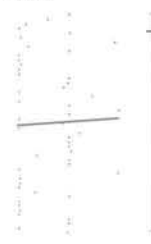

GG (24) GA (22) AA (3)  
Corr: 0.031 R2: 0.001  
Z-Score: 0.214 P-Value: 0.831

HBv2-Controls

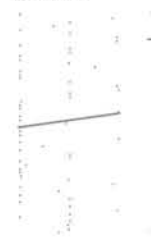

GG (20) GA (21) AA (10)  
Corr: 0.075 R2: 0.006  
Z-Score: 0.568 P-Value: 0.57

HBv2-CeliacDisease

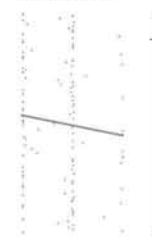

GG (41) GA (57) AA (13)  
Corr: -0.099 R2: 0.01  
Z-Score: -1.028 P-Value: 0.299

HBv2-ALS

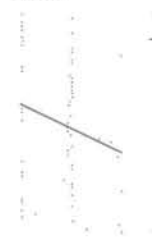

GG (20) GA (32) AA (7)  
Corr: -0.231 R2: 0.053  
Z-Score: -1.762 P-Value: 0.078

SNP rs11622954 (chr. 11, 182856 bp)  
Probe 1050292 (chr. 3, 130261335 - 130264935 bp), GP9  
P-Value 1.64E-7

HT12-Controls

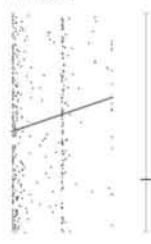

GG (248) GA (143) AA (23)  
Corr: 0.144 R2: 0.021  
Z-Score: 2.934 P-Value: 0.003

HT12-COPD

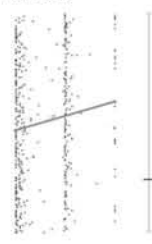

GG (261) GA (185) AA (27)  
Corr: 0.134 R2: 0.018  
Z-Score: 2.853 P-Value: 0.004

HT12-ALS

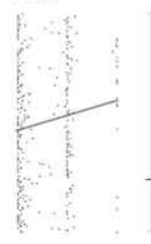

GG (190) GA (116) AA (18)  
Corr: 0.134 R2: 0.018  
Z-Score: 2.419 P-Value: 0.016

HT12-UC

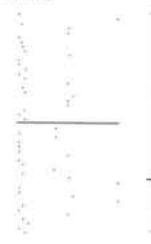

GG (31) GA (15) AA (3)  
Corr: -0.002 R2: 0  
Z-Score: -0.012 P-Value: 0.99

HBv2-Controls

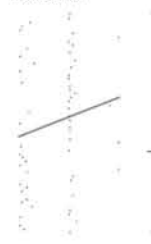

GG (26) GA (29) AA (4)  
Corr: 0.174 R2: 0.03  
Z-Score: 1.317 P-Value: 0.188

HBv2-CeliacDisease

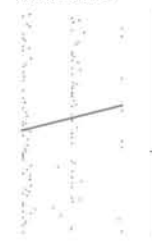

GG (56) GA (47) AA (8)  
Corr: 0.115 R2: 0.013  
Z-Score: 1.197 P-Value: 0.231

HBv2-ALS

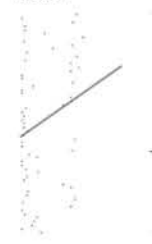

GG (40) GA (19) AA (0)  
Corr: 0.236 R2: 0.057  
Z-Score: 1.821 P-Value: 0.069

SNP rs1245738 (chr. 3, 56840616 bp)  
Probe 2340577 (chr. 1, 120261435 - 120278414 bp), AQP10/ATP9B2  
P-Value 1.61E-7

HT12-Controls

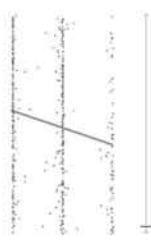

GG (153) GA (194) AA (67)  
Corr: -0.187 R2: 0.035  
Z-Score: -3.818 P-Value: 1.35E-4

HT12-COPD

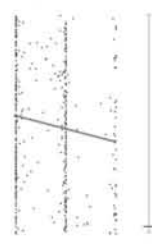

GG (202) GA (200) AA (51)  
Corr: -0.133 R2: 0.018  
Z-Score: -2.839 P-Value: 0.005

HT12-ALS

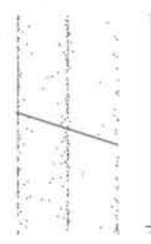

GG (132) GA (148) AA (44)  
Corr: -0.165 R2: 0.027  
Z-Score: -2.984 P-Value: 0.003

HT12-UC

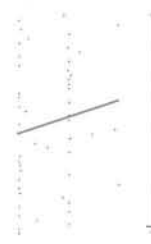

GG (24) GA (22) AA (3)  
Corr: 0.153 R2: 0.023  
Z-Score: 1.048 P-Value: 0.295

HBv2-Controls  
eQTL not available  
Probe not present.

HBv2-CeliacDisease  
eQTL not available  
Probe not present.

HBv2-ALS  
eQTL not available  
Probe not present.

SNP rs425105 (chr. 19, 51900321 bp)  
Probe 1000390 (chr. 12, 111826122 - 111830177 bp), OAS1  
P-Value 1.58E-7

HT12-Controls

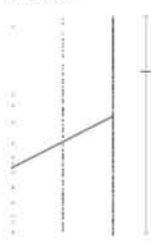

CC (15) CT (100) TT (290)  
Corr: 0.22 R2: 0.048  
Z-Score: 4.509 P-Value: 6.5E-6

HT12-COPD

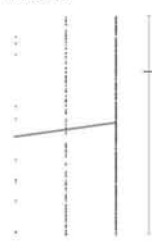

CC (11) CT (119) TT (323)  
Corr: 0.056 R2: 0.003  
Z-Score: 1.18 P-Value: 0.238

HT12-ALS

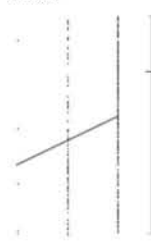

CC (5) CT (89) TT (220)  
Corr: 0.191 R2: 0.036  
Z-Score: 3.455 P-Value: 5.5E-4

HT12-UC

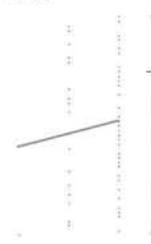

CC (1) CT (10) TT (22)  
Corr: 0.108 R2: 0.012  
Z-Score: 0.736 P-Value: 0.461

HBv2-Controls  
eQTL not available  
Probe not present.

HBv2-CeliacDisease  
eQTL not available  
Probe not present.

HBv2-ALS  
eQTL not available  
Probe not present.

SNP rs12718597 (chr. 7, 503205922 bp)  
Probe 3290161 (chr. 19, 60428926 - 60433444 bp), TME8B8  
P-Value 1.43E-7

HT12-Controls

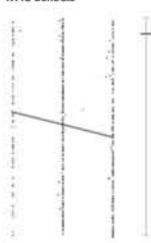

AA (94) AC (197) CC (153)  
Corr: -0.139 R2: 0.019  
Z-Score: -2.83 P-Value: 0.005

HT12-COPD

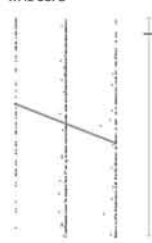

AA (88) AC (226) CC (159)  
Corr: -0.209 R2: 0.044  
Z-Score: -4.492 P-Value: 7.05E-6

HT12-ALS

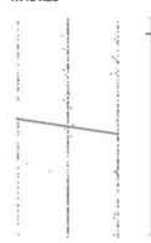

AA (56) AC (103) CC (105)  
Corr: -0.079 R2: 0.006  
Z-Score: -1.42 P-Value: 0.156

HT12-UC

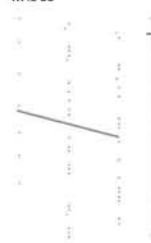

AA (7) AC (23) CC (19)  
Corr: -0.138 R2: 0.019  
Z-Score: -0.946 P-Value: 0.344

HBv2-Controls  
eQTL not available  
Probe not present.

HBv2-CeliacDisease  
eQTL not available  
Probe not present.

HBv2-ALS  
eQTL not available  
Probe not present.

SNP rs11171739 (chr. 12, 54756892 bp)  
Probe 3450750 (chr. 19, 62729505 - 62744506 bp), ZNF549  
P-Value: 1.3E-7

HT12-Controls

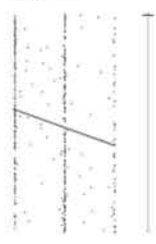

TT (158) TC (190) CC (80)  
Corr: -0.191 R2: 0.036  
Z-Score: -3.958 P-Value: 9.29E-5

HT12-COPD

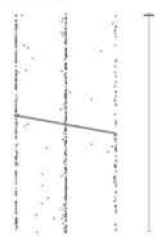

TT (153) TC (225) CC (75)  
Corr: -0.096 R2: 0.009  
Z-Score: -2.048 P-Value: 0.041

HT12-ALS

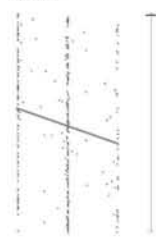

TT (102) TC (174) CC (48)  
Corr: -0.178 R2: 0.032  
Z-Score: -3.235 P-Value: 0.001

HT12-UC

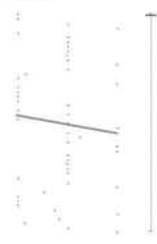

TT (16) TC (34) CC (9)  
Corr: -0.096 R2: 0.009  
Z-Score: -0.654 P-Value: 0.513

HBv2-Controls

eQTL not available  
Probe not present.

HBv2-ColiacDisease

eQTL not available  
Probe not present.

HBv2-ALS

eQTL not available  
Probe not present.

SNP rs2922239 (chr. 12, 54768447 bp)  
Probe 5000026 (chr. 9, 10074959 - 10087889 bp), COL15A1  
P-Value: 1.26E-7

HT12-Controls

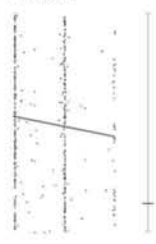

GG (190) GT (180) TT (38)  
Corr: -0.099 R2: 0.01  
Z-Score: -2.015 P-Value: 0.044

HT12-COPD

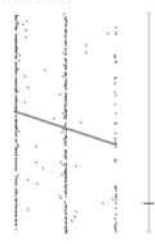

GG (190) GT (200) TT (40)  
Corr: -0.17 R2: 0.029  
Z-Score: -3.63 P-Value: 2.83E-4

HT12-ALS

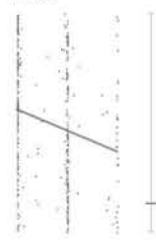

GG (144) GT (147) TT (33)  
Corr: -0.212 R2: 0.045  
Z-Score: -3.841 P-Value: 1.23E-4

HT12-UC

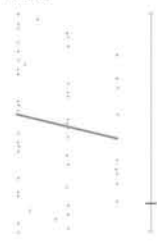

GG (33) GT (17) TT (9)  
Corr: -0.142 R2: 0.02  
Z-Score: -0.974 P-Value: 0.33

HBv2-Controls

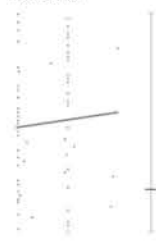

GG (90) GT (26) TT (3)  
Corr: 0.067 R2: 0.005  
Z-Score: 0.507 P-Value: 0.612

HBv2-ColiacDisease

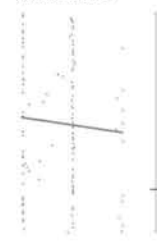

GG (44) GT (55) TT (12)  
Corr: -0.074 R2: 0.005  
Z-Score: -0.737 P-Value: 0.461

HBv2-ALS

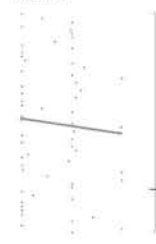

GG (28) GT (26) TT (5)  
Corr: -0.074 R2: 0.005  
Z-Score: -0.555 P-Value: 0.579

SNP rs9357152 (chr. 6, 32772938 bp)  
Probe 7610167 (chr. 19, 49875011 - 49895687 bp), RAB48  
P-Value: 1.21E-7

HT12-Controls

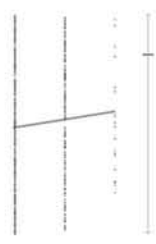

AA (241) AG (154) GG (19)  
Corr: 0.076 R2: 0.006  
Z-Score: 1.542 P-Value: 0.123

HT12-COPD

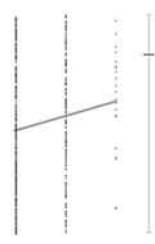

AA (272) AG (190) GG (21)  
Corr: 0.132 R2: 0.017  
Z-Score: 2.82 P-Value: 0.005

HT12-ALS

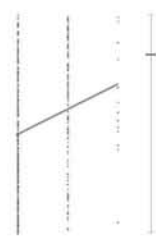

AA (203) AG (108) GG (13)  
Corr: 0.223 R2: 0.05  
Z-Score: 4.057 P-Value: 4.97E-5

HT12-UC

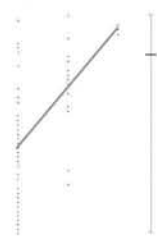

AA (33) AG (13) GG (3)  
Corr: 0.556 R2: 0.309  
Z-Score: 4.145 P-Value: 3.4E-5

HBv2-Controls

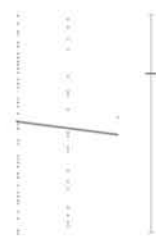

AA (39) AG (19) GG (1)  
Corr: -0.05 R2: 0.003  
Z-Score: -0.379 P-Value: 0.704

HBv2-ColiacDisease

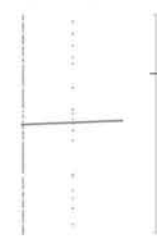

AA (83) AG (18) GG (0)  
Corr: 0.012 R2: 0  
Z-Score: 0.127 P-Value: 0.899

HBv2-ALS

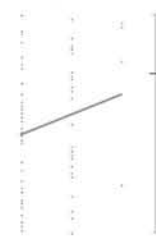

AA (37) AG (23) GG (4)  
Corr: 0.192 R2: 0.037  
Z-Score: 1.461 P-Value: 0.144

SNP rs11022954 (chr. 11, 192856 bp)  
Probe 1980315 (chr. 5, 24871568 - 24871568 bp), -  
P-Value: 1.12E-7

HT12-Controls

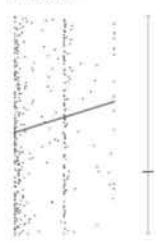

GG (248) GA (143) AA (23)  
Corr: 0.135 R2: 0.018  
Z-Score: 2.746 P-Value: 0.006

HT12-COPD

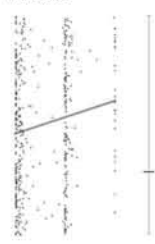

GG (261) GA (165) AA (27)  
Corr: 0.152 R2: 0.023  
Z-Score: 3.251 P-Value: 0.001

HT12-ALS

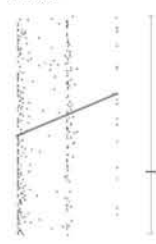

GG (190) GA (116) AA (18)  
Corr: 0.187 R2: 0.035  
Z-Score: 3.389 P-Value: 7E-4

HT12-UC

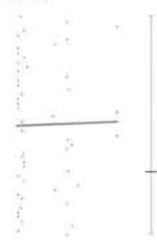

GG (31) GA (15) AA (3)  
Corr: 0.019 R2: 0  
Z-Score: 0.131 P-Value: 0.896

HBv2-Controls

eQTL not available  
Probe not present.

HBv2-ColiacDisease

eQTL not available  
Probe not present.

HBv2-ALS

eQTL not available  
Probe not present.

SNP rs8321 (chr. 6, 30140501 bp)  
Probe 1110300 (chr. 4, 153760727 - 153821641 bp), TMEM154  
P-Value: 1.09E-7

HT12-Controls

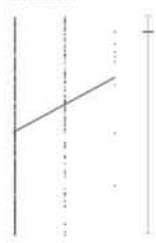

AA (316) AC (90) CC (8)  
Corr: 0.207 R2: 0.043  
Z-Score: 4.246 P-Value: 2.18E-5

HT12-COPD

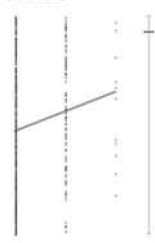

AA (341) AC (101) CC (11)  
Corr: 0.151 R2: 0.023  
Z-Score: 3.231 P-Value: 0.001

HT12-ALS

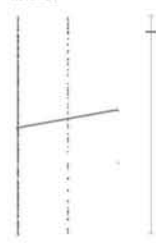

AA (248) AC (74) CC (2)  
Corr: 0.063 R2: 0.004  
Z-Score: 1.126 P-Value: 0.26

HT12-UC

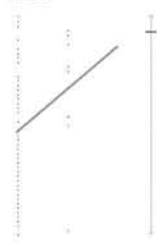

AA (41) AC (3) CC (0)  
Corr: 0.248 R2: 0.061  
Z-Score: 1.704 P-Value: 0.088

HBv2-Controls

eQTL not available  
Probe not present.

HBv2-ColiacDisease

eQTL not available  
Probe not present.

HBv2-ALS

eQTL not available  
Probe not present.

SNP rs1427407 (chr. 2, 60571547 bp)  
Probe Human\_FitSeq\_8\_v2-6400079 (chr. 11, 5229996 - 5429081 bp), HBG2(WENST0000039563)

P-Value: 1.05E-7

HT12-Controls

eQTL not available

Probe not present.

HT12-COPD

eQTL not available

Probe not present.

HT12-ALS

eQTL not available

Probe not present.

HT12-UC

eQTL not available

Probe not present.

HbV2-Controls

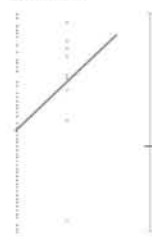

GG (50) GT (9) TT (0)  
Corr: 0.266 R2: 0.071  
Z-Score: 2.039 P-Value: 0.041

HbV2-CeliacDisease

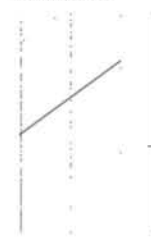

GG (78) GT (30) TT (3)  
Corr: 0.302 R2: 0.091  
Z-Score: 3.221 P-Value: 0.001

HbV2-ALS

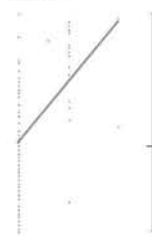

GG (42) GT (15) TT (2)  
Corr: 0.499 R2: 0.249  
Z-Score: 4.021 P-Value: 5.79E-5

SNP rs1701704 (chr. 12, 54698754 bp)  
Probe 5000026 (chr. 9, 10074959 - 10087889 bp), COL15A1

P-Value: 1.03E-7

HT12-Controls

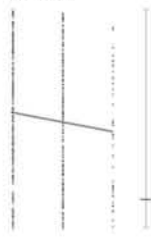

TT (193) TG (178) GG (43)  
Corr: -0.1 R2: 0.01  
Z-Score: -2.034 P-Value: 0.042

HT12-COPD

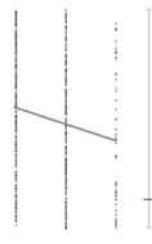

TT (190) TG (200) GG (51)  
Corr: -0.171 R2: 0.029  
Z-Score: -3.854 P-Value: 2.59E-4

HT12-ALS

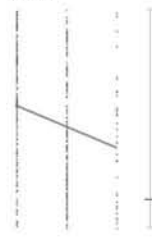

TT (145) TG (148) GG (33)  
Corr: -0.22 R2: 0.048  
Z-Score: -3.991 P-Value: 6.59E-5

HT12-UC

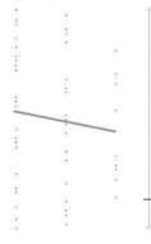

TT (22) TG (18) GG (9)  
Corr: -0.119 R2: 0.014  
Z-Score: -0.817 P-Value: 0.414

HbV2-Controls

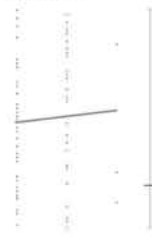

TT (31) TG (25) GG (3)  
Corr: 0.055 R2: 0.003  
Z-Score: 0.417 P-Value: 0.677

HbV2-CeliacDisease

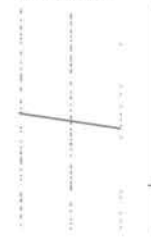

TT (44) TG (54) GG (13)  
Corr: -0.075 R2: 0.006  
Z-Score: -0.782 P-Value: 0.434

HbV2-ALS

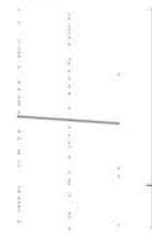

TT (27) TG (27) GG (5)  
Corr: -0.036 R2: 0.001  
Z-Score: -0.271 P-Value: 0.786

SNP rs929645 (chr. 6, 32516502 bp)  
Probe 5570703 (chr. 21, 38672819 - 38956488 bp), EFG

P-Value: 9.6E-8

HT12-Controls

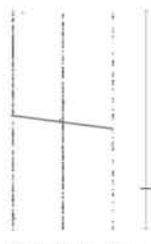

CC (172) CG (187) GG (55)  
Corr: -0.074 R2: 0.005  
Z-Score: -1.502 P-Value: 0.133

HT12-COPD

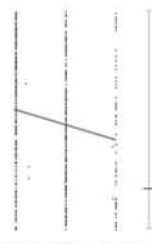

CC (194) CG (197) GG (62)  
Corr: -0.168 R2: 0.028  
Z-Score: -3.582 P-Value: 3.41E-4

HT12-ALS

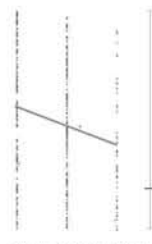

CC (199) CG (140) GG (45)  
Corr: -0.213 R2: 0.045  
Z-Score: -3.857 P-Value: 1.15E-4

HT12-UC

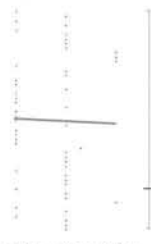

CC (20) CG (25) GG (4)  
Corr: -0.025 R2: 0.001  
Z-Score: -0.17 P-Value: 0.885

HbV2-Controls

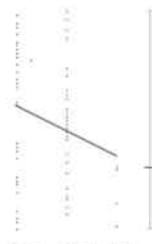

CC (29) CG (20) GG (4)  
Corr: -0.238 R2: 0.057  
Z-Score: -1.815 P-Value: 0.07

HbV2-CeliacDisease

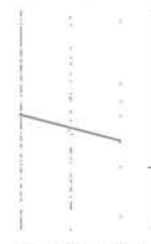

CC (73) CG (31) GG (7)  
Corr: -0.122 R2: 0.015  
Z-Score: -1.272 P-Value: 0.203

HbV2-ALS

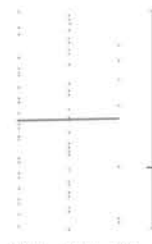

CC (24) CG (28) GG (7)  
Corr: 0.012 R2: 0  
Z-Score: 0.067 P-Value: 0.93

SNP rs9399137 (chr. 6, 135482711 bp)  
Probe 6960615 (chr. 16, 1932977 - 1945672 bp), RPL3L

P-Value: 9.59E-8

HT12-Controls

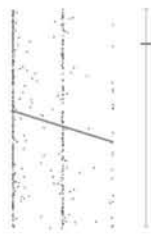

TT (289) TC (158) CC (25)  
Corr: -0.144 R2: 0.021  
Z-Score: -2.935 P-Value: 0.003

HT12-COPD

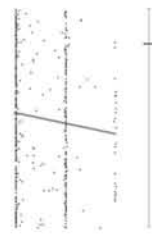

TT (256) TC (173) CC (25)  
Corr: -0.098 R2: 0.01  
Z-Score: -2.08 P-Value: 0.038

HT12-ALS

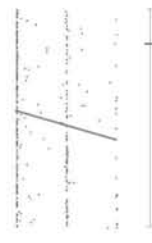

TT (188) TC (114) CC (22)  
Corr: -0.14 R2: 0.02  
Z-Score: -2.522 P-Value: 0.012

HT12-UC

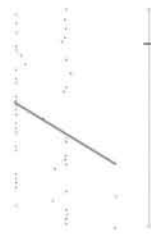

TT (25) TC (22) CC (2)  
Corr: -0.268 R2: 0.071  
Z-Score: -1.847 P-Value: 0.065

HbV2-Controls

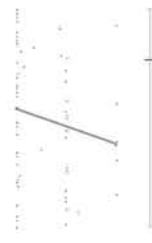

TT (34) TC (19) CC (6)  
Corr: -0.181 R2: 0.033  
Z-Score: -1.374 P-Value: 0.17

HbV2-CeliacDisease

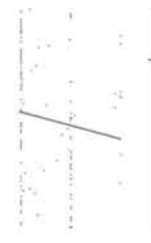

TT (85) TC (37) CC (9)  
Corr: -0.134 R2: 0.018  
Z-Score: -1.407 P-Value: 0.159

HbV2-ALS

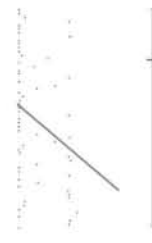

TT (42) TC (17) CC (6)  
Corr: -0.283 R2: 0.08  
Z-Score: -2.17 P-Value: 0.03

SNP rs778054 (chr. 6, 135482609 bp)  
Probe 6960615 (chr. 16, 1932977 - 1945672 bp), RPL3L

P-Value: 9.43E-8

HT12-Controls

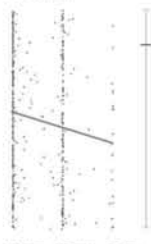

AA (263) AG (158) GG (25)  
Corr: -0.144 R2: 0.021  
Z-Score: -2.933 P-Value: 0.003

HT12-COPD

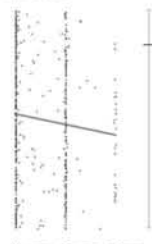

AA (255) AG (178) GG (25)  
Corr: -0.098 R2: 0.01  
Z-Score: -2.081 P-Value: 0.037

HT12-ALS

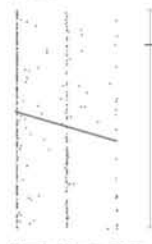

AA (188) AG (114) GG (22)  
Corr: -0.14 R2: 0.02  
Z-Score: -2.52 P-Value: 0.012

HT12-UC

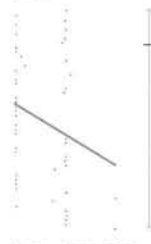

AA (25) AG (22) GG (2)  
Corr: -0.268 R2: 0.071  
Z-Score: -1.844 P-Value: 0.065

HbV2-Controls

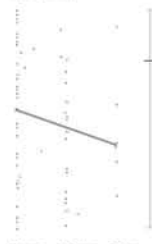

AA (34) AG (19) GG (6)  
Corr: -0.181 R2: 0.033  
Z-Score: -1.374 P-Value: 0.17

HbV2-CeliacDisease

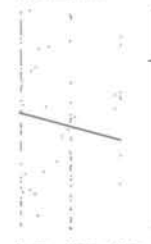

AA (85) AG (37) GG (9)  
Corr: -0.135 R2: 0.018  
Z-Score: -1.408 P-Value: 0.159

HbV2-ALS

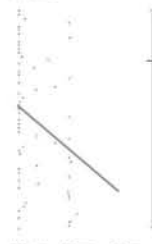

AA (42) AG (17) GG (6)  
Corr: -0.283 R2: 0.08  
Z-Score: -2.174 P-Value: 0.03

SNP rs675629 (chr. 2, 43018594 bp)  
Probe 3120368 (chr. 3, 9910358 - 9934079 bp), IL17RE  
P-Value 8.69E-8

HT12-Controls

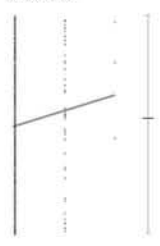

GG (372) GA (39) AA (3)  
Corr: 0.081 R2: 0.007  
Z-Score:1.65 P-Value:0.099

HT12-COPD

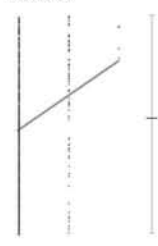

GG (381) GA (68) AA (1)  
Corr: 0.217 R2: 0.047  
Z-Score:4.688 P-Value:3.03E-8

HT12-ALS

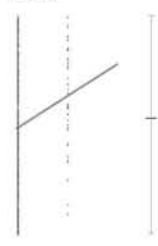

GG (289) GA (95) AA (0)  
Corr: 0.157 R2: 0.025  
Z-Score:2.83 P-Value:0.005

HT12-UC

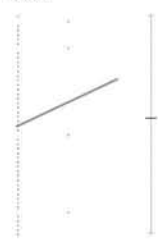

GG (45) GA (4) AA (0)  
Corr: 0.1 R2: 0.01  
Z-Score:0.685 P-Value:0.494

HBv2-Controls

eQTL not available  
Probe not present.

HBv2-ColiacDisease

eQTL not available  
Probe not present.

HBv2-ALS

eQTL not available  
Probe not present.

SNP rs2523393 (chr. 6, 29813638 bp)  
Probe 4200025 (chr. 11, 119585957 - 119606959 bp), OAF  
P-Value 8.57E-8

HT12-Controls

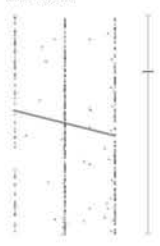

GG (72) GA (190) AA (140)  
Corr: -0.14 R2: 0.02  
Z-Score:-2.882 P-Value:0.004

HT12-COPD

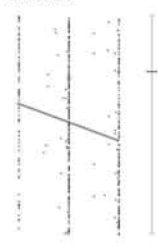

GG (76) GA (221) AA (152)  
Corr: -0.197 R2: 0.039  
Z-Score:-4.219 P-Value:2.45E-5

HT12-ALS

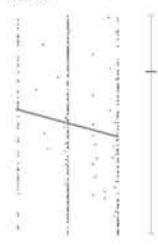

GG (53) GA (158) AA (113)  
Corr: -0.144 R2: 0.021  
Z-Score:-2.604 P-Value:0.009

HT12-UC

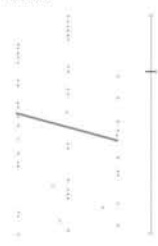

GG (18) GA (20) AA (11)  
Corr: -0.153 R2: 0.023  
Z-Score:-1.551 P-Value:0.293

HBv2-Controls

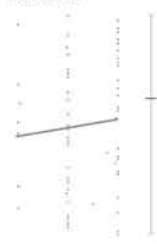

GG (7) GA (25) AA (27)  
Corr: 0.087 R2: 0.008  
Z-Score:0.654 P-Value:0.513

HBv2-ColiacDisease

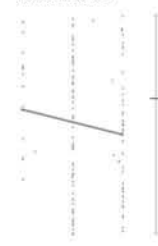

GG (14) GA (54) AA (83)  
Corr: -0.129 R2: 0.017  
Z-Score:-1.347 P-Value:0.178

HBv2-ALS

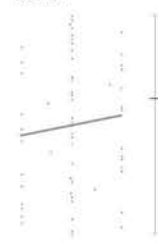

GG (12) GA (32) AA (15)  
Corr: 0.103 R2: 0.011  
Z-Score:0.773 P-Value:0.44

SNP rs7758512 (chr. 6, 30078568 bp)  
Probe 4200600 (chr. 20, 6551199 - 65560176 bp), C20orf200  
P-Value 8.35E-8

HT12-Controls

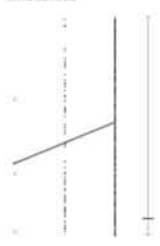

GG (4) GT (64) TT (348)  
Corr: 0.13 R2: 0.017  
Z-Score:2.655 P-Value:0.008

HT12-COPD

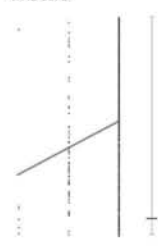

GG (6) GT (58) TT (389)  
Corr: 0.167 R2: 0.028  
Z-Score:3.561 P-Value:3.7E-4

HT12-ALS

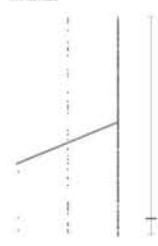

GG (3) GT (44) TT (227)  
Corr: 0.125 R2: 0.016  
Z-Score:2.257 P-Value:0.024

HT12-UC

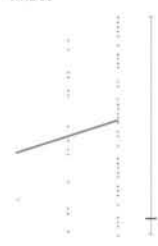

GG (1) GT (14) TT (34)  
Corr: 0.124 R2: 0.015  
Z-Score:0.851 P-Value:0.395

HBv2-Controls

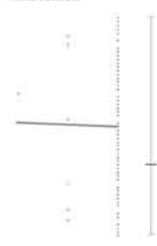

GG (1) GT (6) TT (52)  
Corr: -0.01 R2: 0  
Z-Score:-0.077 P-Value:0.939

HBv2-ColiacDisease

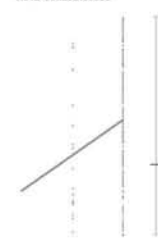

GG (6) GT (16) TT (95)  
Corr: 0.192 R2: 0.037  
Z-Score:2.02 P-Value:0.043

HBv2-ALS

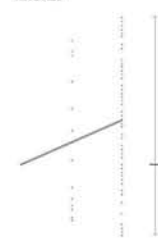

GG (9) GT (14) TT (45)  
Corr: 0.145 R2: 0.021  
Z-Score:1.096 P-Value:0.273

SNP rs3129934 (chr. 6, 32444165 bp)  
Probe 3180504 (chr. 11, 69538721 - 6959052 bp), ATPGD1  
P-Value 7.8E-8

HT12-Controls

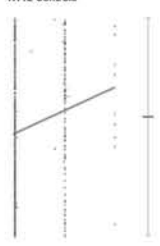

CC (303) CT (102) TT (9)  
Corr: 0.183 R2: 0.034  
Z-Score:3.745 P-Value:1.8E-4

HT12-COPD

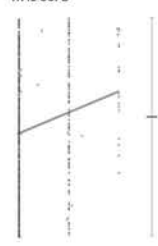

CC (381) CT (104) TT (18)  
Corr: 0.178 R2: 0.032  
Z-Score:3.813 P-Value:1.37E-4

HT12-ALS

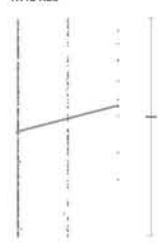

CC (229) CT (84) TT (11)  
Corr: 0.111 R2: 0.012  
Z-Score:1.993 P-Value:0.046

HT12-UC

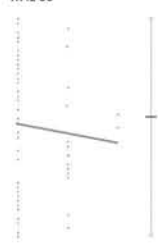

CC (34) CT (13) TT (2)  
Corr: -0.084 R2: 0.007  
Z-Score:-0.57 P-Value:0.568

HBv2-Controls

eQTL not available  
Probe not present.

HBv2-ColiacDisease

eQTL not available  
Probe not present.

HBv2-ALS

eQTL not available  
Probe not present.

SNP rs12718597 (chr. 7, 50325922 bp)  
Probe 830309 (chr. 17, 69714519 - 69728996 bp), FAM104A/COG1  
P-Value 7.32E-8

HT12-Controls

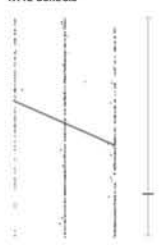

AA (94) AC (197) CC (153)  
Corr: -0.238 R2: 0.057  
Z-Score:-4.906 P-Value:9.31E-7

HT12-COPD

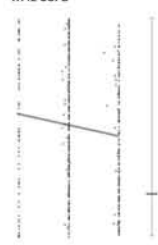

AA (68) AC (226) CC (159)  
Corr: -0.118 R2: 0.014  
Z-Score:-2.503 P-Value:0.012

HT12-ALS

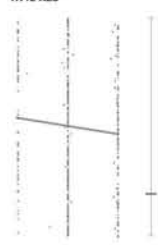

AA (56) AC (103) CC (105)  
Corr: -0.089 R2: 0.008  
Z-Score:-1.59 P-Value:0.112

HT12-UC

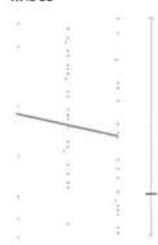

AA (7) AC (23) CC (19)  
Corr: -0.115 R2: 0.013  
Z-Score:-0.787 P-Value:0.431

HBv2-Controls

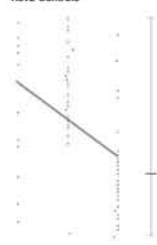

AA (11) AC (25) CC (25)  
Corr: -0.428 R2: 0.183  
Z-Score:-3.382 P-Value:7.19E-4

HBv2-ColiacDisease

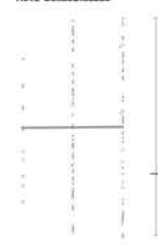

AA (11) AC (53) CC (47)  
Corr: 0.005 R2: 0  
Z-Score:0.051 P-Value:0.96

HBv2-ALS

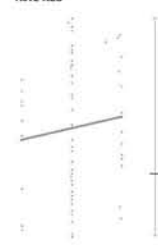

AA (9) AC (95) CC (15)  
Corr: 0.113 R2: 0.013  
Z-Score:0.849 P-Value:0.396

SNP rs2517713 (chr. 6, 30066078 bp)  
 Probe 80003 (chr. 8, 10276847 - 103007311 bp), NCALD  
 P-Value: 6.81E-8

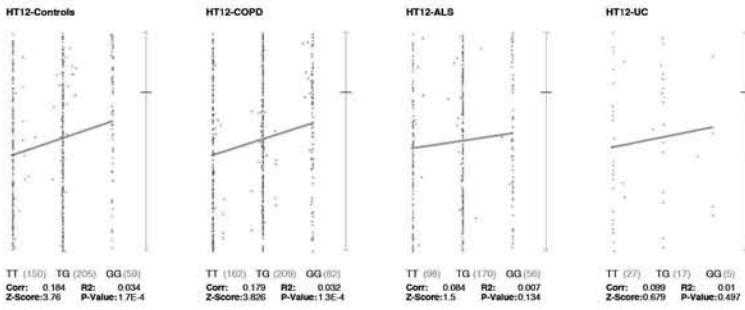

HBv2-Controls  
 eQTL not available  
 Probe not present.

HBv2-ColiacDisease  
 eQTL not available  
 Probe not present.

HBv2-ALS  
 eQTL not available  
 Probe not present.

SNP rs11171739 (chr. 12, 54756892 bp)  
 Probe 3190671 (chr. 19, 1191749 - 1196823 bp), ATP5D  
 P-Value: 5.99E-8

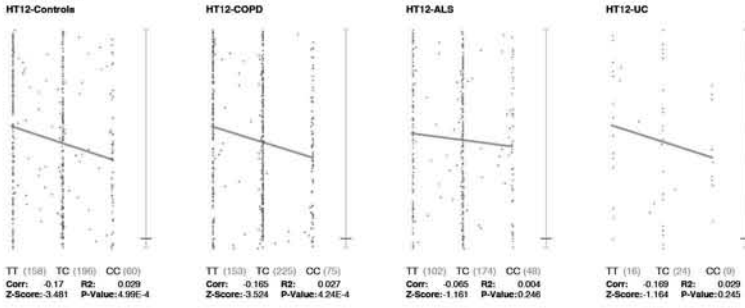

HBv2-Controls  
 eQTL not available  
 Probe not present.

HBv2-ColiacDisease  
 eQTL not available  
 Probe not present.

HBv2-ALS  
 eQTL not available  
 Probe not present.

SNP rs12485738 (chr. 3, 56842616 bp)  
 Probe 4800681 (chr. 4, 156006328 - 156872626 bp), GUCY1A3  
 P-Value: 6.05E-8

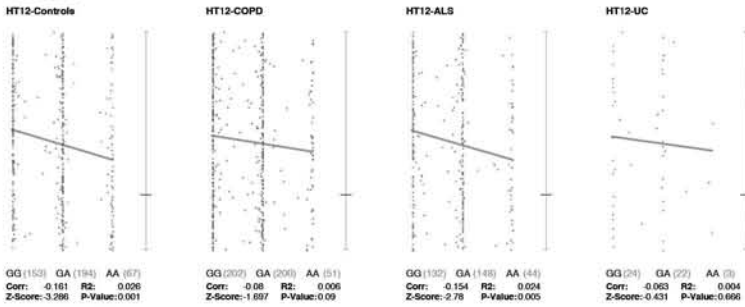

HBv2-Controls  
 eQTL not available  
 Probe not present.

HBv2-ColiacDisease  
 eQTL not available  
 Probe not present.

HBv2-ALS  
 eQTL not available  
 Probe not present.

SNP rs3131296 (chr. 6, 32280971 bp)  
 Probe 1110300 (chr. 4, 153785727 - 153821641 bp), TMEM154  
 P-Value: 5.68E-8

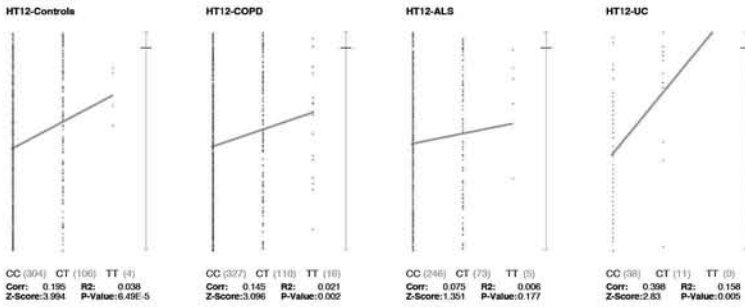

HBv2-Controls  
 eQTL not available  
 Probe not present.

HBv2-ColiacDisease  
 eQTL not available  
 Probe not present.

HBv2-ALS  
 eQTL not available  
 Probe not present.

SNP rs745761 (chr. 6, 31444079 bp)  
 Probe 6260347 (chr. 22, 40346041 - 40390980 bp), MPOC6  
 P-Value: 5.68E-8

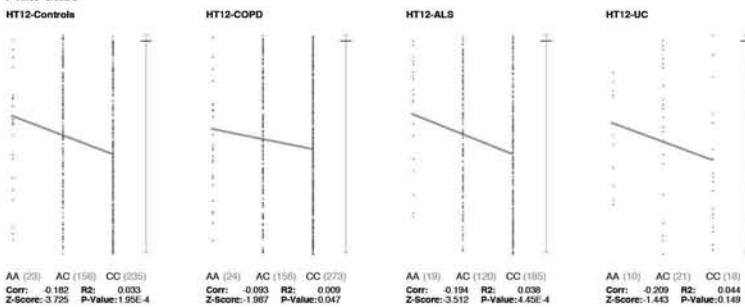

HBv2-Controls  
 eQTL not available  
 Probe not present.

HBv2-ColiacDisease  
 eQTL not available  
 Probe not present.

HBv2-ALS  
 eQTL not available  
 Probe not present.



SNP rs494620 (chr. 6, 31946692 bp)  
Probe 1110300 (chr. 4, 153765727 - 153821641 bp), TMEM154  
P-Value: 5.01E-8

HT12-Controls

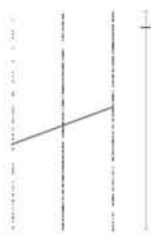

AA (51) AG (206) GG (157)  
Corr: 0.196 R2: 0.039  
Z-Score:4.025 P-Value:5.69E-5

HT12-COPD

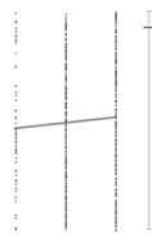

AA (52) AG (200) GG (193)  
Corr: 0.057 R2: 0.003  
Z-Score:1.218 P-Value:0.223

HT12-ALS

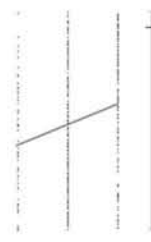

AA (50) AG (154) GG (117)  
Corr: 0.226 R2: 0.051  
Z-Score:4.111 P-Value:3.96E-5

HT12-UC

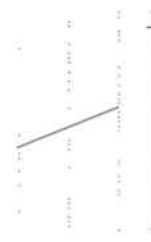

AA (7) AG (20) GG (22)  
Corr: 0.219 R2: 0.048  
Z-Score:4.151 P-Value:0.131

HBv2-Controls  
eQTL not available  
Probe not present.

HBv2-ColiacDisease  
eQTL not available  
Probe not present.

HBv2-ALS  
eQTL not available  
Probe not present.

SNP rs2292239 (chr. 12, 54768447 bp)  
Probe 3450750 (chr. 19, 62729505 - 62744936 bp), ZNF549  
P-Value: 4.89E-8

HT12-Controls

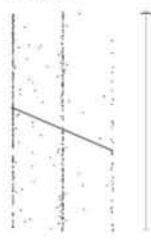

GG (196) GT (180) TT (38)  
Corr: -0.214 R2: 0.046  
Z-Score:-4.387 P-Value:1.19E-5

HT12-COPD

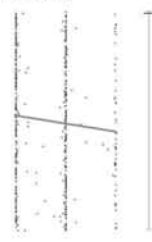

GG (190) GT (200) TT (40)  
Corr: -0.086 R2: 0.007  
Z-Score:-1.827 P-Value:0.068

HT12-ALS

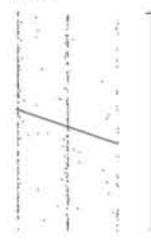

GG (144) GT (147) TT (33)  
Corr: -0.168 R2: 0.028  
Z-Score:-3.038 P-Value:0.002

HT12-UC

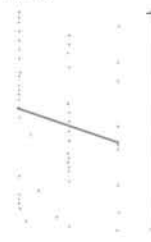

GG (33) GT (17) TT (9)  
Corr: -0.191 R2: 0.037  
Z-Score:-1.316 P-Value:0.188

HBv2-Controls  
eQTL not available  
Probe not present.

HBv2-ColiacDisease  
eQTL not available  
Probe not present.

HBv2-ALS  
eQTL not available  
Probe not present.

SNP rs6445975 (chr. 3, 58345217 bp)  
Probe 450370 (chr. 16, 63103029 - 63103029 bp),  
P-Value: 4.87E-8

HT12-Controls

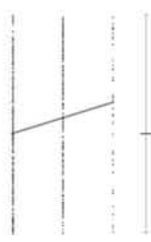

TT (200) TG (177) GG (37)  
Corr: 0.156 R2: 0.024  
Z-Score:3.191 P-Value:0.001

HT12-COPD

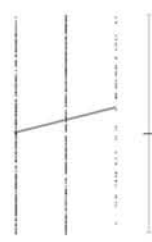

TT (199) TG (205) GG (45)  
Corr: 0.126 R2: 0.016  
Z-Score:2.682 P-Value:0.007

HT12-ALS

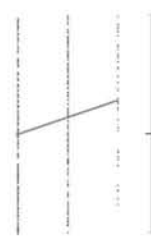

TT (160) TG (127) GG (37)  
Corr: 0.187 R2: 0.035  
Z-Score:3.377 P-Value:7.32E-4

HT12-UC

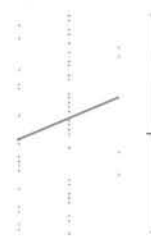

TT (17) TG (28) GG (4)  
Corr: 0.193 R2: 0.037  
Z-Score:1.326 P-Value:0.184

HBv2-Controls  
eQTL not available  
Probe not present.

HBv2-ColiacDisease  
eQTL not available  
Probe not present.

HBv2-ALS  
eQTL not available  
Probe not present.

SNP rs11171739 (chr. 12, 54756892 bp)  
Probe 1030333 (chr. 17, 29025409 - 29029329 bp), CCL2  
P-Value: 4.93E-8

HT12-Controls

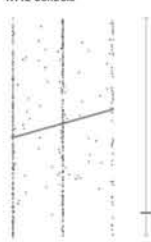

TT (158) TC (190) CC (60)  
Corr: 0.152 R2: 0.023  
Z-Score:3.056 P-Value:0.002

HT12-COPD

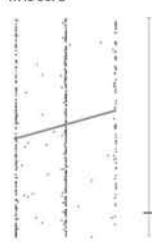

TT (153) TC (225) CC (75)  
Corr: 0.132 R2: 0.021  
Z-Score:3.235 P-Value:0.001

HT12-ALS

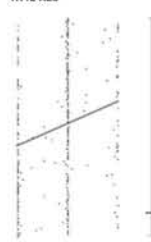

TT (102) TC (174) CC (68)  
Corr: 0.226 R2: 0.051  
Z-Score:4.097 P-Value:4.18E-5

HT12-UC

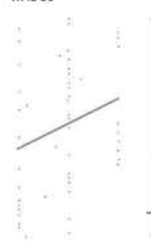

TT (16) TC (24) CC (9)  
Corr: 0.269 R2: 0.072  
Z-Score:1.87 P-Value:0.062

HBv2-Controls  
eQTL not available  
Probe not present.

HBv2-ColiacDisease  
eQTL not available  
Probe not present.

HBv2-ALS  
eQTL not available  
Probe not present.

SNP rs11171739 (chr. 12, 54756892 bp)  
Probe 2650112 (chr. 9, 13796357 - 13799404 bp), UBAC1  
P-Value: 4.6E-8

HT12-Controls

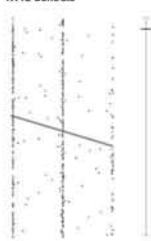

TT (158) TC (190) CC (60)  
Corr: -0.155 R2: 0.024  
Z-Score:-3.165 P-Value:0.002

HT12-COPD

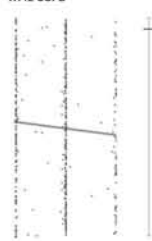

TT (153) TC (225) CC (75)  
Corr: -0.071 R2: 0.005  
Z-Score:-1.515 P-Value:0.13

HT12-ALS

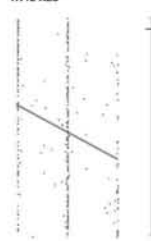

TT (102) TC (174) CC (68)  
Corr: -0.278 R2: 0.078  
Z-Score:-5.1 P-Value:3.4E-7

HT12-UC

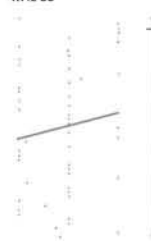

TT (16) TC (24) CC (9)  
Corr: 0.14 R2: 0.02  
Z-Score:0.961 P-Value:0.337

HBv2-Controls  
eQTL not available  
Probe not present.

HBv2-ColiacDisease  
eQTL not available  
Probe not present.

HBv2-ALS  
eQTL not available  
Probe not present.

SNP rs643361 (chr. 6, 139681116 bp)  
Probe 3290369 (chr. 20, 1040906 - 1090022 bp), PSMF1  
P-Value 4.43E-8

HT12-Controls

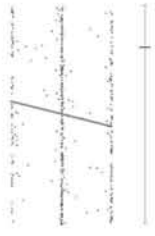

AA (82) AC (210) CC (110)  
Corr: -0.129 R2: 0.017  
Z-Score: 2.627 P-Value: 0.009

HT12-COPD

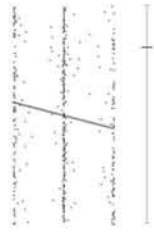

AA (110) AC (230) CC (101)  
Corr: -0.133 R2: 0.018  
Z-Score: 2.842 P-Value: 0.004

HT12-ALS

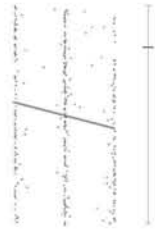

AA (95) AC (149) CC (80)  
Corr: -0.151 R2: 0.023  
Z-Score: 2.715 P-Value: 0.007

HT12-UC

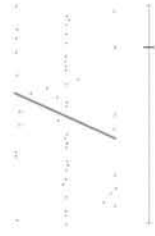

AA (11) AC (29) CC (9)  
Corr: -0.211 R2: 0.044  
Z-Score: 1.452 P-Value: 0.147

HBv2-Controls

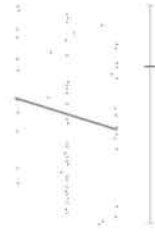

AA (11) AC (31) CC (17)  
Corr: -0.161 R2: 0.026  
Z-Score: 1.218 P-Value: 0.223

HBv2-ColiacDisease

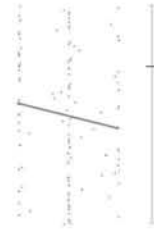

AA (30) AC (57) CC (24)  
Corr: -0.128 R2: 0.016  
Z-Score: 1.339 P-Value: 0.18

HBv2-ALS

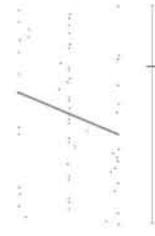

AA (14) AC (28) CC (17)  
Corr: -0.227 R2: 0.051  
Z-Score: 1.725 P-Value: 0.085

SNP rs626751 (chr. 6, 139681112 bp)  
Probe 3290369 (chr. 20, 1040906 - 1090022 bp), PSMF1  
P-Value 4.4E-8

HT12-Controls

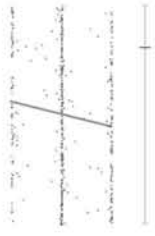

AA (82) AC (210) CC (110)  
Corr: -0.129 R2: 0.017  
Z-Score: 2.63 P-Value: 0.009

HT12-COPD

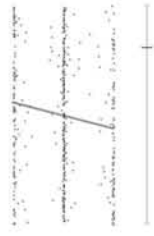

AA (110) AC (230) CC (101)  
Corr: -0.134 R2: 0.018  
Z-Score: 2.852 P-Value: 0.004

HT12-ALS

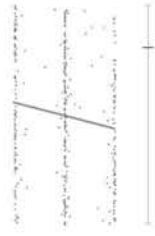

AA (95) AC (149) CC (80)  
Corr: -0.15 R2: 0.022  
Z-Score: 2.705 P-Value: 0.007

HT12-UC

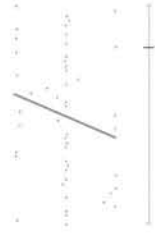

AA (11) AC (29) CC (9)  
Corr: -0.208 R2: 0.043  
Z-Score: 1.452 P-Value: 0.151

HBv2-Controls

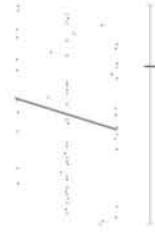

AA (11) AC (31) CC (17)  
Corr: -0.162 R2: 0.026  
Z-Score: 1.225 P-Value: 0.22

HBv2-ColiacDisease

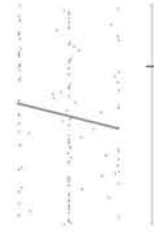

AA (30) AC (57) CC (24)  
Corr: -0.128 R2: 0.016  
Z-Score: 1.339 P-Value: 0.181

HBv2-ALS

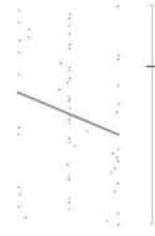

AA (14) AC (28) CC (17)  
Corr: -0.227 R2: 0.051  
Z-Score: 1.727 P-Value: 0.084

SNP rs12718597 (chr. 7, 50395922 bp)  
Probe 1780538 (chr. 23, 152616234 bp), SLC6A8  
P-Value 4.33E-8

HT12-Controls

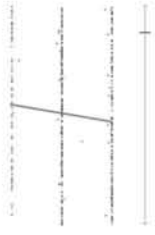

AA (64) AC (197) CC (153)  
Corr: -0.095 R2: 0.009  
Z-Score: 1.924 P-Value: 0.054

HT12-COPD

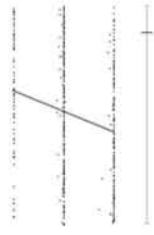

AA (68) AC (226) CC (159)  
Corr: -0.222 R2: 0.049  
Z-Score: 4.779 P-Value: 1.76E-6

HT12-ALS

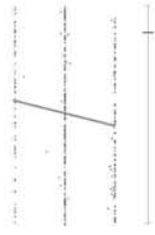

AA (56) AC (163) CC (105)  
Corr: -0.137 R2: 0.019  
Z-Score: 2.47 P-Value: 0.014

HT12-UC

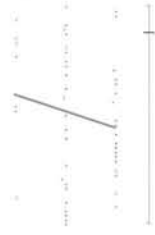

AA (7) AC (23) CC (11)  
Corr: -0.175 R2: 0.031  
Z-Score: 1.203 P-Value: 0.229

HBv2-Controls

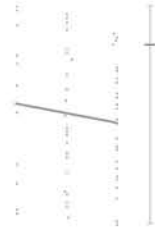

AA (11) AC (23) CC (25)  
Corr: -0.107 R2: 0.012  
Z-Score: -0.808 P-Value: 0.419

HBv2-ColiacDisease

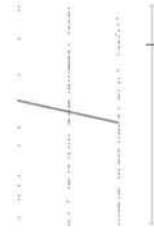

AA (11) AC (53) CC (47)  
Corr: -0.113 R2: 0.013  
Z-Score: -1.176 P-Value: 0.239

HBv2-ALS

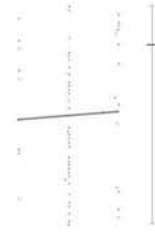

AA (9) AC (35) CC (15)  
Corr: 0.042 R2: 0.002  
Z-Score: 0.313 P-Value: 0.754

SNP rs13437062 (chr. 6, 31462529 bp)  
Probe 6380347 (chr. 22, 40348241 - 4039096 bp), XFCC6  
P-Value 4.14E-8

HT12-Controls

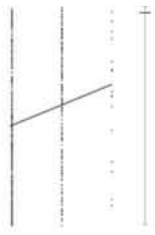

CC (248) CT (148) TT (17)  
Corr: 0.185 R2: 0.034  
Z-Score: 3.793 P-Value: 1.49E-4

HT12-COPD

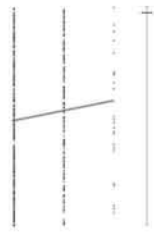

CC (260) CT (189) TT (24)  
Corr: 0.095 R2: 0.009  
Z-Score: 2.03 P-Value: 0.042

HT12-ALS

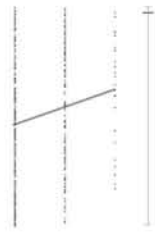

CC (188) CT (113) TT (28)  
Corr: 0.173 R2: 0.03  
Z-Score: 3.134 P-Value: 0.002

HT12-UC

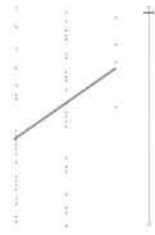

CC (22) CT (23) TT (4)  
Corr: 0.342 R2: 0.117  
Z-Score: 2.404 P-Value: 0.016

HBv2-Controls

eQTL not available  
Probe not present.

HBv2-ColiacDisease

eQTL not available  
Probe not present.

HBv2-ALS

eQTL not available  
Probe not present.

SNP rs570917 (chr. 22, 49364219 bp)  
Probe 2940673 (chr. 16, 2957408 - 2957567 bp), KHEMN2  
P-Value 3.81E-8

HT12-Controls

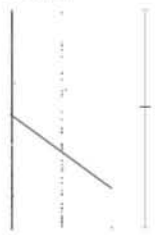

TT (385) TC (48) CC (11)  
Corr: -0.192 R2: 0.037  
Z-Score: 3.938 P-Value: 8.17E-5

HT12-COPD

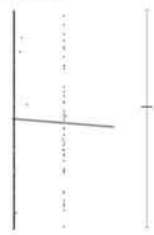

TT (411) TC (42) CC (0)  
Corr: -0.018 R2: 0  
Z-Score: 0.394 P-Value: 0.701

HT12-ALS

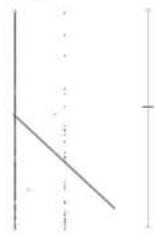

TT (292) TC (82) CC (0)  
Corr: -0.22 R2: 0.048  
Z-Score: 3.989 P-Value: 6.64E-5

HT12-UC

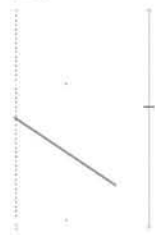

TT (47) TC (2) CC (0)  
Corr: -0.103 R2: 0.011  
Z-Score: -0.705 P-Value: 0.481

HBv2-Controls

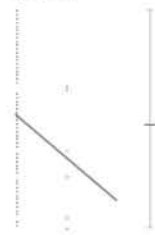

TT (53) TC (6) CC (0)  
Corr: -0.201 R2: 0.04  
Z-Score: 1.526 P-Value: 0.127

HBv2-ColiacDisease

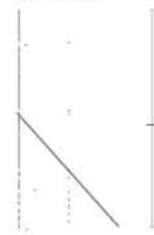

TT (100) TC (11) CC (0)  
Corr: -0.266 R2: 0.071  
Z-Score: 2.817 P-Value: 0.005

HBv2-ALS

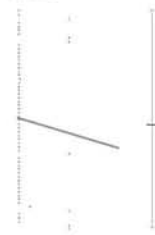

TT (52) TC (7) CC (0)  
Corr: -0.076 R2: 0.006  
Z-Score: 0.573 P-Value: 0.566

SNP rs1245738 (chr. 3, 56840616 bp)  
 Probe 1000739 (chr. 2, 108570199 - 108671134 bp), LIMS1  
 P-Value 3.82E-8

HT12-Controls

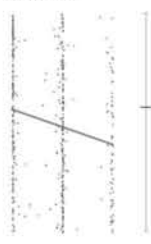

GG (153) GA (194) AA (67)  
 Corr: 0.192 R2: 0.037  
 Z-Score:3.932 P-Value:5.41E-5

HT12-COPD

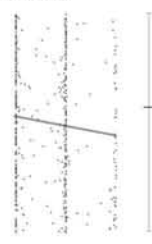

GG (202) GA (200) AA (51)  
 Corr: 0.1 R2: 0.01  
 Z-Score:2.12 P-Value:0.034

HT12-ALS

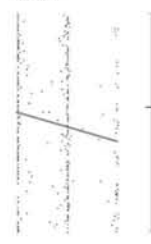

GG (132) GA (148) AA (44)  
 Corr: 0.148 R2: 0.022  
 Z-Score:2.686 P-Value:0.007

HT12-UC

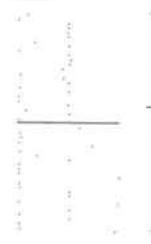

GG (24) GA (22) AA (3)  
 Corr: 0.003 R2: 0  
 Z-Score:0.02 P-Value:0.984

HBv2-Controls

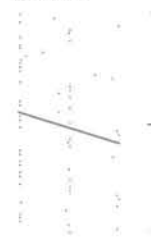

GG (29) GA (21) AA (10)  
 Corr: 0.173 R2: 0.03  
 Z-Score:1.307 P-Value:0.191

HBv2-ColiacDisease

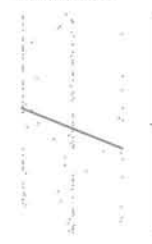

GG (41) GA (57) AA (13)  
 Corr: 0.199 R2: 0.04  
 Z-Score:2.091 P-Value:0.037

HBv2-ALS

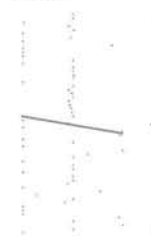

GG (20) GA (32) AA (7)  
 Corr: 0.064 R2: 0.007  
 Z-Score:0.636 P-Value:0.525

SNP rs12474009 (chr. 2, 141437612 bp)  
 Probe 5490717 (chr. 9, 139442152 - 139453200 bp), NOXA1/ENTPD8  
 P-Value 3.3E-8

HT12-Controls

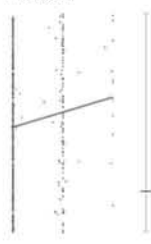

AA (296) AT (106) TT (12)  
 Corr: 0.124 R2: 0.015  
 Z-Score:2.534 P-Value:0.012

HT12-COPD

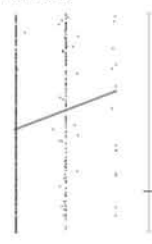

AA (308) AT (130) TT (15)  
 Corr: 0.164 R2: 0.027  
 Z-Score:3.509 P-Value:4.9E-4

HT12-ALS

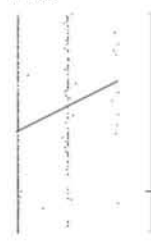

AA (228) AT (86) TT (10)  
 Corr: 0.207 R2: 0.043  
 Z-Score:3.744 P-Value:1.81E-4

HT12-UC

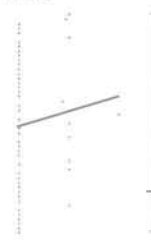

AA (39) AT (9) TT (1)  
 Corr: 0.107 R2: 0.012  
 Z-Score:0.734 P-Value:0.463

HBv2-Controls

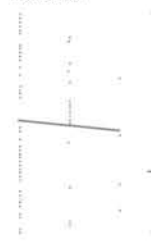

AA (89) AT (16) TT (4)  
 Corr: 0.047 R2: 0.002  
 Z-Score:0.355 P-Value:0.722

HBv2-ColiacDisease

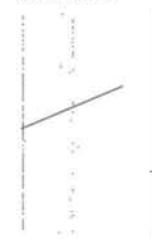

AA (80) AT (31) TT (8)  
 Corr: 0.145 R2: 0.021  
 Z-Score:1.514 P-Value:0.13

HBv2-ALS

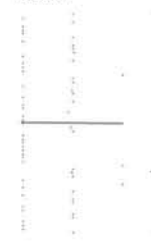

AA (32) AT (24) TT (8)  
 Corr: 0.003 R2: 0  
 Z-Score:0.023 P-Value:0.981

SNP rs1117139 (chr. 3, 159896597 bp), RARRES1  
 Probe 2340681 (chr. 3, 159896597 - 159933969 bp), RARRES1  
 P-Value 2.99E-8

HT12-Controls

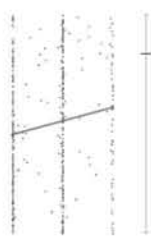

TT (158) TC (196) CC (60)  
 Corr: 0.144 R2: 0.021  
 Z-Score:2.936 P-Value:0.003

HT12-COPD

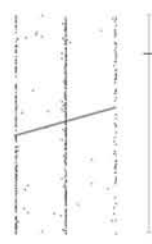

TT (153) TC (225) CC (75)  
 Corr: 0.148 R2: 0.021  
 Z-Score:3.12 P-Value:0.002

HT12-ALS

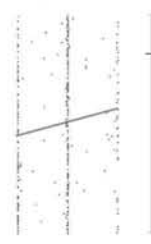

TT (102) TC (174) CC (48)  
 Corr: 0.138 R2: 0.019  
 Z-Score:2.489 P-Value:0.013

HT12-UC

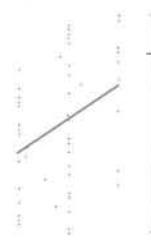

TT (18) TC (24) CC (9)  
 Corr: 0.361 R2: 0.13  
 Z-Score:2.546 P-Value:0.011

HBv2-Controls

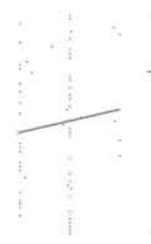

TT (22) TC (32) CC (5)  
 Corr: 0.108 R2: 0.012  
 Z-Score:0.817 P-Value:0.414

HBv2-ColiacDisease

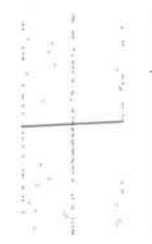

TT (33) TC (59) CC (19)  
 Corr: 0.026 R2: 0.001  
 Z-Score:0.273 P-Value:0.785

HBv2-ALS

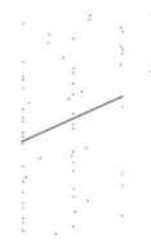

TT (24) TC (25) CC (10)  
 Corr: 0.25 R2: 0.063  
 Z-Score:1.912 P-Value:0.056

SNP rs1900493 (chr. 6, 32471193 bp)  
 Probe 2940424 (chr. 7, 36518135 - 36731595 bp), AOH1  
 P-Value 2.89E-8

HT12-Controls

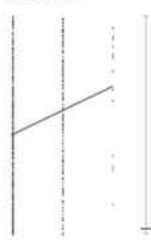

TT (164) TC (135) CC (15)  
 Corr: 0.211 R2: 0.044  
 Z-Score:4.323 P-Value:1.54E-5

HT12-COPD

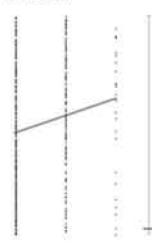

TT (277) TC (150) CC (26)  
 Corr: 0.182 R2: 0.026  
 Z-Score:3.454 P-Value:5.53E-4

HT12-ALS

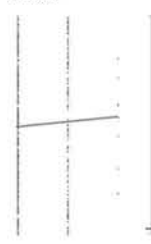

TT (113) TC (103) CC (8)  
 Corr: 0.044 R2: 0.002  
 Z-Score:0.788 P-Value:0.431

HT12-UC

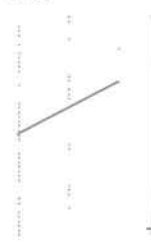

TT (34) TC (14) CC (1)  
 Corr: 0.206 R2: 0.043  
 Z-Score:1.422 P-Value:0.155

HBv2-Controls

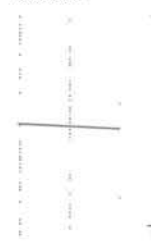

TT (30) TC (27) CC (2)  
 Corr: 0.019 R2: 0  
 Z-Score:-0.146 P-Value:0.894

HBv2-ColiacDisease

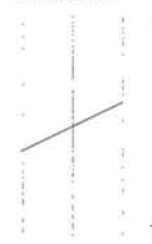

TT (19) TC (68) CC (24)  
 Corr: 0.235 R2: 0.055  
 Z-Score:2.479 P-Value:0.013

HBv2-ALS

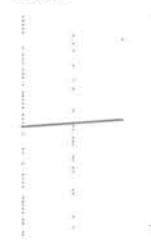

TT (38) TC (20) CC (1)  
 Corr: 0.029 R2: 0.001  
 Z-Score:0.217 P-Value:0.828

SNP rs250919 (chr. 6, 30133482 bp)  
 Probe 5080576 (chr. 4, 52917852 - 55002636 bp), KIT  
 P-Value 2.96E-8

HT12-Controls

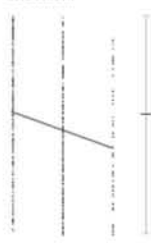

GG (166) GA (192) AA (55)  
 Corr: 0.196 R2: 0.038  
 Z-Score:4.009 P-Value:6.09E-5

HT12-COPD

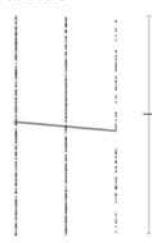

GG (189) GA (192) AA (72)  
 Corr: 0.053 R2: 0.003  
 Z-Score:1.12 P-Value:0.263

HT12-ALS

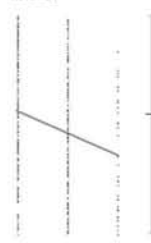

GG (145) GA (143) AA (38)  
 Corr: 0.232 R2: 0.054  
 Z-Score:4.214 P-Value:2.51E-5

HT12-UC

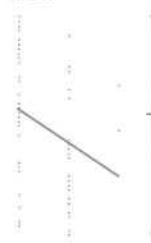

GG (27) GA (20) AA (2)  
 Corr: 0.298 R2: 0.089  
 Z-Score:2.081 P-Value:0.037

HBv2-Controls

eQTL not available  
 Probe not present.

HBv2-ColiacDisease

eQTL not available  
 Probe not present.

HBv2-ALS

eQTL not available  
 Probe not present.

SNP rs1701704 (chr. 12, 54698754 bp)  
Probe 3310592 (chr. 7, 98917628 - 98936200 bp), ZNF789/ZNF384  
P-Value 2.59E-8

HT12-Controls

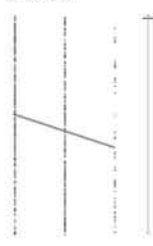

TT (193) TG (178) GG (43)  
Corr: -0.17 R2: 0.029  
Z-Score: 3.474 P-Value: 1.13E-4

HT12-COPD

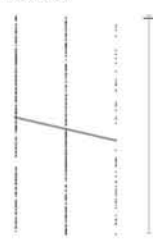

TT (190) TG (200) GG (51)  
Corr: -0.12 R2: 0.014  
Z-Score: 2.56 P-Value: 0.01

HT12-ALS

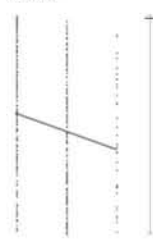

TT (145) TG (146) GG (35)  
Corr: -0.186 R2: 0.035  
Z-Score: 3.36 P-Value: 7.79E-4

HT12-UC

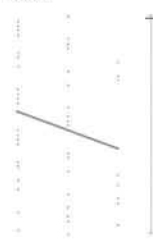

TT (22) TG (18) GG (9)  
Corr: 0.217 R2: 0.047  
Z-Score: 1.501 P-Value: 0.133

HbV2-Controls

eQTL not available  
Probe not present.

HbV2-CeliacDisease

eQTL not available  
Probe not present.

HbV2-ALS

eQTL not available  
Probe not present.

SNP rs11622954 (chr. 11, 182856 bp)  
Probe 630470 (chr. 19, 43485644 - 43488486 bp), C19orf33  
P-Value 2.59E-8

HT12-Controls

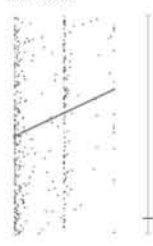

GG (248) GA (143) AA (20)  
Corr: 0.203 R2: 0.041  
Z-Score: 4.164 P-Value: 3.13E-5

HT12-COPD

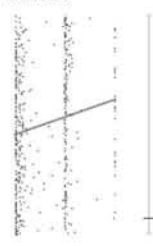

GG (281) GA (185) AA (27)  
Corr: 0.157 R2: 0.025  
Z-Score: 3.348 P-Value: 8.13E-4

HT12-ALS

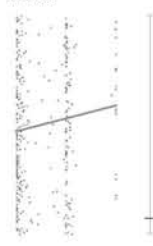

GG (190) GA (116) AA (18)  
Corr: 0.119 R2: 0.014  
Z-Score: 2.147 P-Value: 0.032

HT12-UC

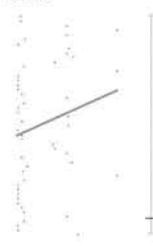

GG (31) GA (15) AA (3)  
Corr: 0.201 R2: 0.04  
Z-Score: 1.362 P-Value: 0.167

HbV2-Controls

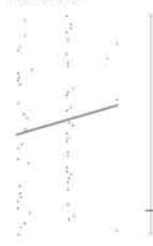

GG (26) GA (29) AA (4)  
Corr: 0.129 R2: 0.017  
Z-Score: 0.976 P-Value: 0.329

HbV2-CeliacDisease

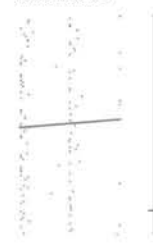

GG (56) GA (47) AA (8)  
Corr: 0.037 R2: 0.001  
Z-Score: 0.38 P-Value: 0.704

HbV2-ALS

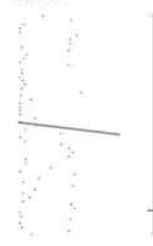

GG (40) GA (19) AA (0)  
Corr: 0.041 R2: 0.002  
Z-Score: 0.307 P-Value: 0.759

SNP rs12485738 (chr. 3, 56840616 bp)  
Probe 1740456 (chr. 7, 30140077 - 30169906 bp), C7orf41  
P-Value 2.41E-8

HT12-Controls

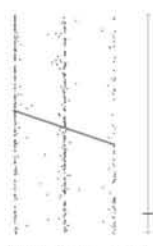

GG (153) GA (194) AA (67)  
Corr: -0.181 R2: 0.033  
Z-Score: 3.697 P-Value: 2.19E-4

HT12-COPD

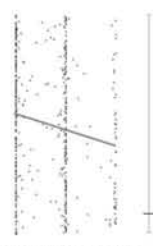

GG (202) GA (200) AA (51)  
Corr: -0.164 R2: 0.027  
Z-Score: 3.495 P-Value: 4.74E-4

HT12-ALS

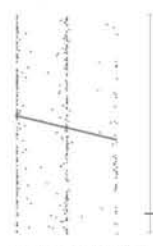

GG (132) GA (148) AA (44)  
Corr: -0.125 R2: 0.016  
Z-Score: 2.257 P-Value: 0.024

HT12-UC

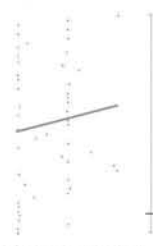

GG (24) GA (22) AA (3)  
Corr: 0.119 R2: 0.014  
Z-Score: 0.814 P-Value: 0.416

HbV2-Controls

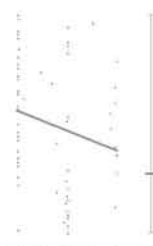

GG (28) GA (21) AA (10)  
Corr: -0.217 R2: 0.047  
Z-Score: 1.648 P-Value: 0.099

HbV2-CeliacDisease

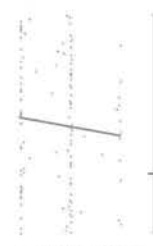

GG (41) GA (57) AA (13)  
Corr: -0.088 R2: 0.008  
Z-Score: 0.919 P-Value: 0.358

HbV2-ALS

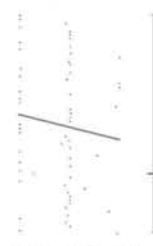

GG (20) GA (32) AA (7)  
Corr: -0.117 R2: 0.014  
Z-Score: 0.882 P-Value: 0.378

SNP rs12485738 (chr. 3, 56840616 bp)  
Probe 20075 (chr. 3, 49030497 - 49034303 bp), DALRD3/hsa-miR/C3orf80  
P-Value 2.26E-8

HT12-Controls

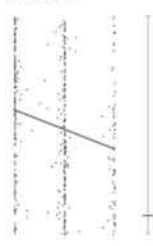

GG (153) GA (194) AA (67)  
Corr: -0.212 R2: 0.045  
Z-Score: 4.342 P-Value: 1.41E-5

HT12-COPD

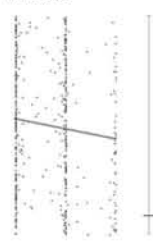

GG (202) GA (200) AA (51)  
Corr: -0.107 R2: 0.012  
Z-Score: 2.286 P-Value: 0.022

HT12-ALS

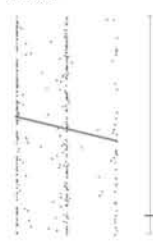

GG (132) GA (148) AA (44)  
Corr: -0.13 R2: 0.017  
Z-Score: 2.335 P-Value: 0.02

HT12-UC

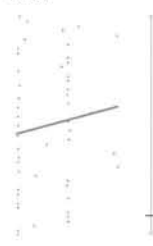

GG (24) GA (22) AA (3)  
Corr: 0.124 R2: 0.015  
Z-Score: 0.849 P-Value: 0.396

HbV2-Controls

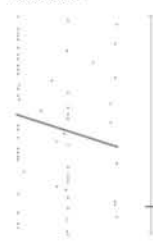

GG (28) GA (21) AA (10)  
Corr: -0.179 R2: 0.032  
Z-Score: 1.353 P-Value: 0.176

HbV2-CeliacDisease

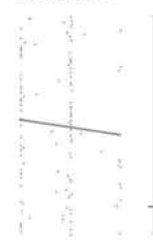

GG (41) GA (57) AA (13)  
Corr: -0.077 R2: 0.006  
Z-Score: 0.8 P-Value: 0.424

HbV2-ALS

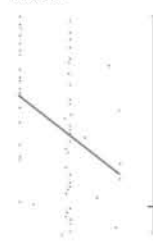

GG (20) GA (32) AA (7)  
Corr: -0.371 R2: 0.138  
Z-Score: 2.895 P-Value: 0.004

SNP rs12718587 (chr. 7, 50325922 bp)  
Probe 7610615 (chr. 16, 33040034 - 33250316 bp), SLCO6A1P/WAC1335614  
P-Value 2.08E-8

HT12-Controls

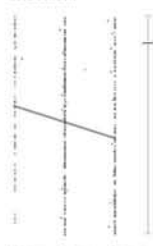

AA (94) AC (197) CC (153)  
Corr: -0.177 R2: 0.031  
Z-Score: 3.628 P-Value: 2.86E-4

HT12-COPD

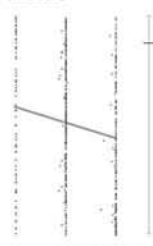

AA (68) AC (226) CC (159)  
Corr: -0.165 R2: 0.027  
Z-Score: 3.522 P-Value: 4.28E-4

HT12-ALS

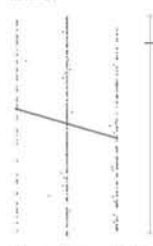

AA (56) AC (193) CC (105)  
Corr: -0.154 R2: 0.024  
Z-Score: 2.776 P-Value: 0.005

HT12-UC

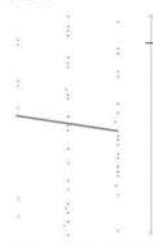

AA (7) AC (23) CC (19)  
Corr: -0.078 R2: 0.006  
Z-Score: 0.53 P-Value: 0.596

HbV2-Controls

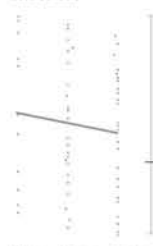

AA (11) AC (23) CC (25)  
Corr: -0.121 R2: 0.015  
Z-Score: 0.911 P-Value: 0.362

HbV2-CeliacDisease

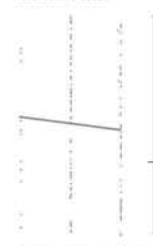

AA (11) AC (53) CC (47)  
Corr: -0.067 R2: 0.004  
Z-Score: 0.694 P-Value: 0.488

HbV2-ALS

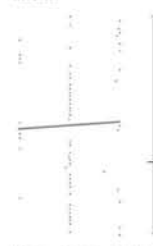

AA (9) AC (35) CC (15)  
Corr: 0.034 R2: 0.001  
Z-Score: 0.252 P-Value: 0.801

SNP rs1117139 (chr. 6, 54756892 bp)  
 Probe 3370349 (chr. 6, 32020406 - 32028840 bp), CF8  
 P-Value 1.99E-8

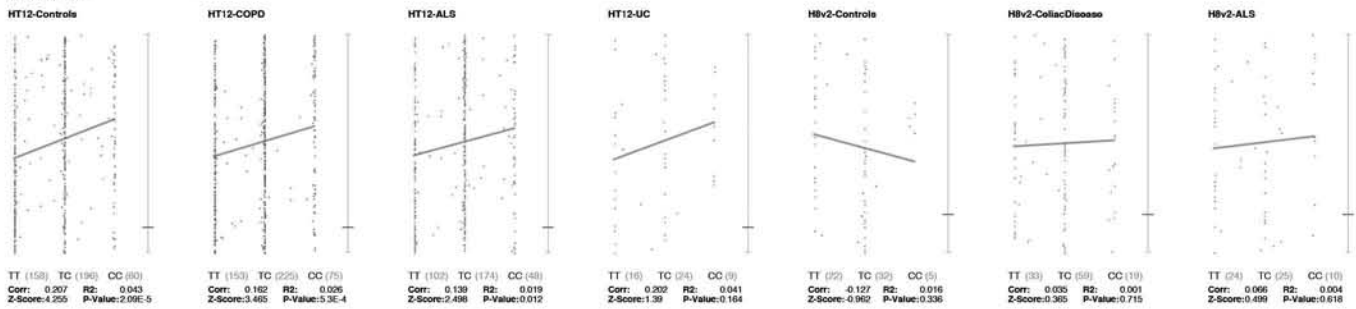

SNP rs2523393 (chr. 6, 29813638 bp)  
 Probe 3900392 (chr. 8, 14513214 - 145140571 bp), GRNA  
 P-Value 1.9E-8

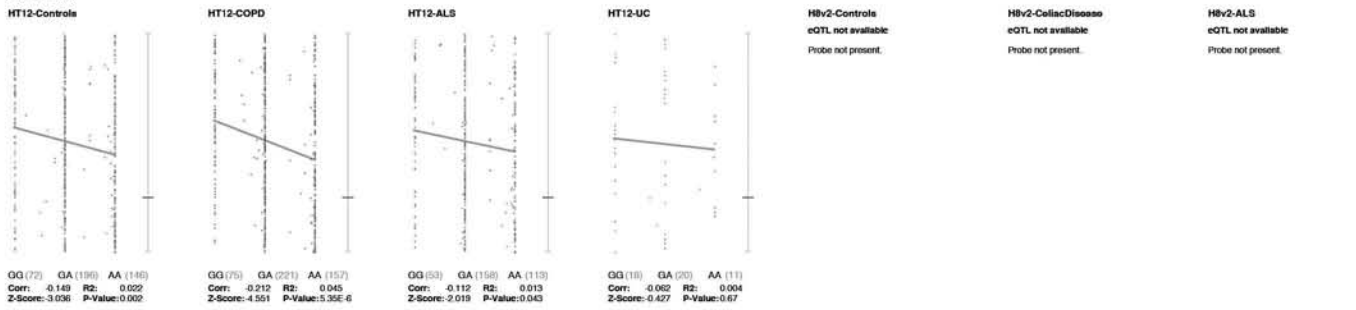

SNP rs2517713 (chr. 6, 30026078 bp)  
 Probe 7000274 (chr. 9, 118691171 - 118694970 bp), RPL10P3/SNOHA70/IASTN2  
 P-Value 1.68E-8

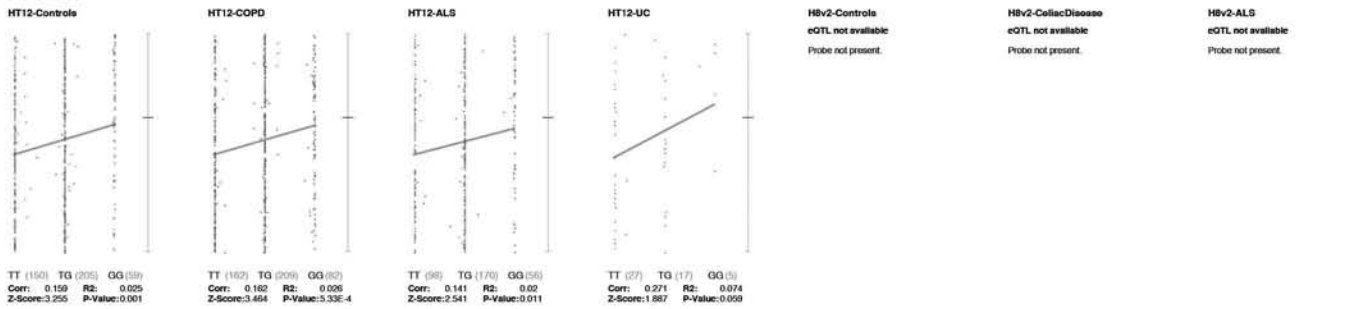

SNP rs2517713 (chr. 6, 30026078 bp)  
 Probe 7360725 (chr. 17, 70824752 - 70914385 bp), GBR2  
 P-Value 1.59E-8

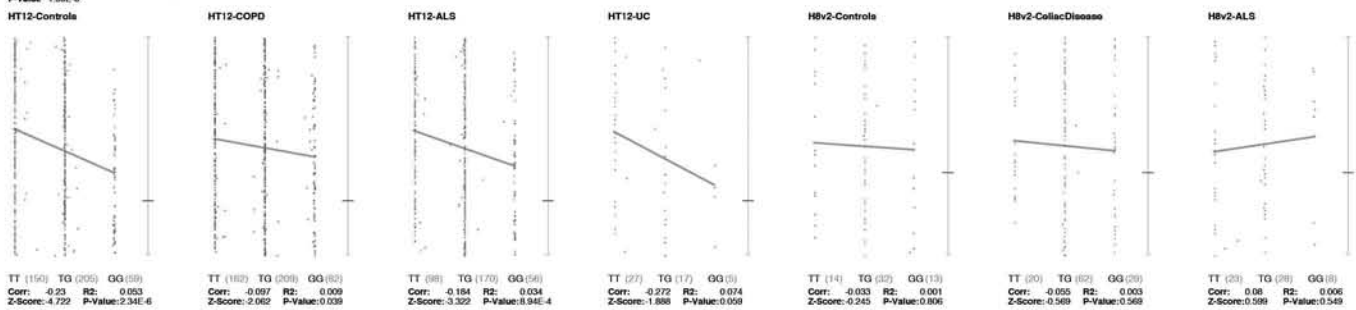

SNP rs1285738 (chr. 3, 56840816 bp)  
 Probe 5560246 (chr. 15, 61120991 - 61152164 bp), TPM1  
 P-Value 1.57E-8

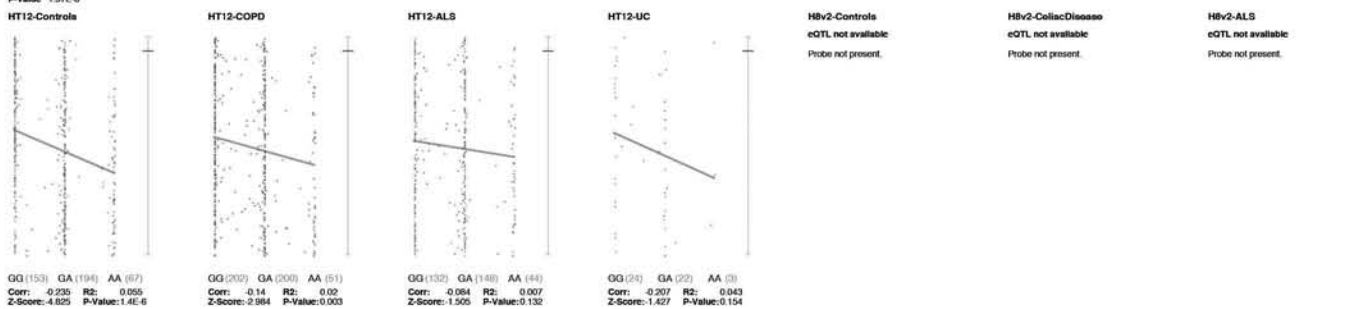

SNP rs12485738 (chr. 3, 56840616 bp)  
Probe 2230241 (chr. 6, 6088310 - 6266923 bp), F13A1  
P-Value: 1.56E-8

HT12-Controls

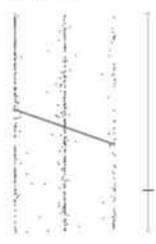

GG (153) GA (194) AA (67)  
Corr: -0.193 R2: 0.037  
Z-Score: -3.947 P-Value: 7.9E-5

HT12-COPD

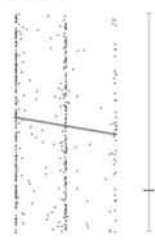

GG (202) GA (200) AA (51)  
Corr: -0.09 R2: 0.008  
Z-Score: -1.91 P-Value: 0.056

HT12-ALS

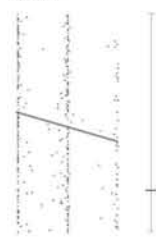

GG (132) GA (148) AA (44)  
Corr: -0.147 R2: 0.022  
Z-Score: -2.659 P-Value: 0.008

HT12-UC

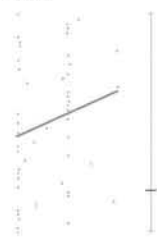

GG (24) GA (22) AA (3)  
Corr: 0.206 R2: 0.043  
Z-Score: 1.430 P-Value: 0.151

HBv2-Controls

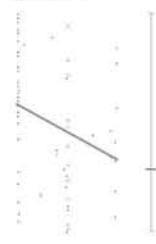

GG (28) GA (21) AA (10)  
Corr: -0.305 R2: 0.093  
Z-Score: -2.346 P-Value: 0.019

HBv2-ColiacDisease

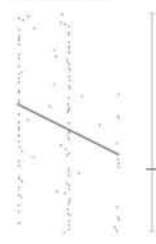

GG (41) GA (57) AA (13)  
Corr: -0.244 R2: 0.059  
Z-Score: -2.578 P-Value: 0.01

HBv2-ALS

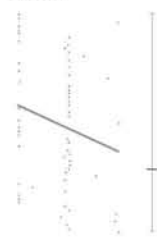

GG (20) GA (32) AA (7)  
Corr: -0.217 R2: 0.047  
Z-Score: -1.649 P-Value: 0.099

SNP rs4917014 (chr. 7, 50276409 bp)  
Probe 780215 (chr. 17, 6917581 - 6925324 bp), CLEC10A  
P-Value: 1.51E-8

HT12-Controls

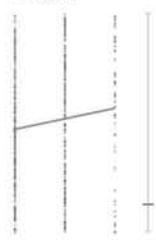

TT (107) TG (168) GG (49)  
Corr: 0.115 R2: 0.013  
Z-Score: 2.341 P-Value: 0.019

HT12-COPD

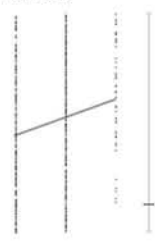

TT (185) TG (222) GG (46)  
Corr: 0.182 R2: 0.033  
Z-Score: 3.894 P-Value: 9.87E-5

HT12-ALS

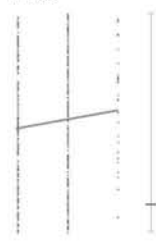

TT (142) TG (158) GG (27)  
Corr: 0.092 R2: 0.008  
Z-Score: 1.646 P-Value: 0.1

HT12-UC

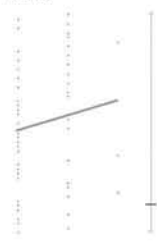

TT (27) TG (110) GG (3)  
Corr: 0.144 R2: 0.021  
Z-Score: 0.989 P-Value: 0.323

HBv2-Controls

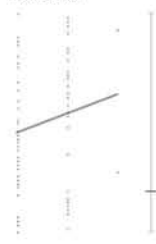

TT (32) TG (25) GG (2)  
Corr: 0.166 R2: 0.028  
Z-Score: 1.256 P-Value: 0.209

HBv2-ColiacDisease

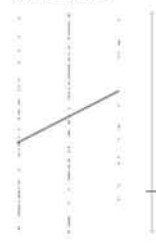

TT (39) TG (58) GG (14)  
Corr: 0.26 R2: 0.068  
Z-Score: 2.76 P-Value: 0.006

HBv2-ALS

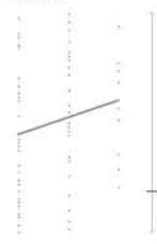

TT (27) TG (33) GG (9)  
Corr: 0.19 R2: 0.036  
Z-Score: 1.438 P-Value: 0.15

SNP rs131794 (chr. 22, 48310618 bp)  
Probe 5940673 (chr. 16, 2957408 - 2957567 bp), KREMEN2  
P-Value: 1.48E-8

HT12-Controls

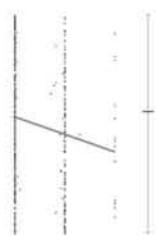

CC (259) CA (142) AA (13)  
Corr: -0.152 R2: 0.023  
Z-Score: -3.109 P-Value: 0.002

HT12-COPD

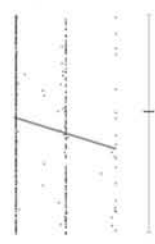

CC (282) CA (148) AA (22)  
Corr: -0.141 R2: 0.02  
Z-Score: -3.012 P-Value: 0.003

HT12-ALS

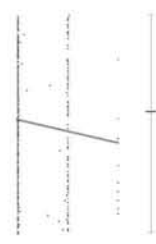

CC (220) CA (94) AA (10)  
Corr: -0.097 R2: 0.009  
Z-Score: -1.738 P-Value: 0.082

HT12-UC

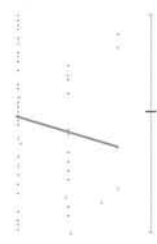

CC (30) CA (14) AA (5)  
Corr: -0.153 R2: 0.023  
Z-Score: -1.048 P-Value: 0.295

HBv2-Controls

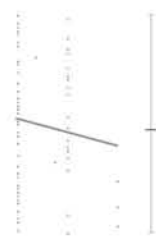

CC (37) CA (19) AA (3)  
Corr: -0.122 R2: 0.015  
Z-Score: -0.92 P-Value: 0.358

HBv2-ColiacDisease

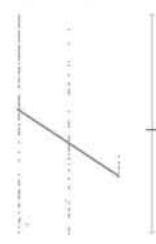

CC (69) CA (36) AA (6)  
Corr: -0.309 R2: 0.095  
Z-Score: -3.297 P-Value: 9.79E-4

HBv2-ALS

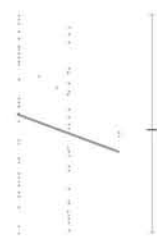

CC (31) CA (26) AA (2)  
Corr: -0.163 R2: 0.027  
Z-Score: -1.233 P-Value: 0.218

SNP rs12485738 (chr. 3, 56840616 bp)  
Probe 3630327 (chr. 3, 12888901 - 129041709 bp), MGLL  
P-Value: 1.45E-8

HT12-Controls

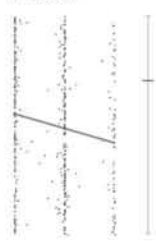

GG (153) GA (194) AA (67)  
Corr: -0.158 R2: 0.025  
Z-Score: -3.216 P-Value: 0.001

HT12-COPD

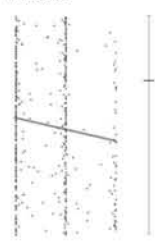

GG (202) GA (200) AA (51)  
Corr: -0.119 R2: 0.014  
Z-Score: -2.536 P-Value: 0.011

HT12-ALS

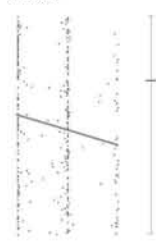

GG (132) GA (148) AA (44)  
Corr: -0.155 R2: 0.024  
Z-Score: -2.794 P-Value: 0.005

HT12-UC

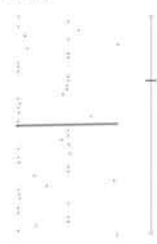

GG (24) GA (22) AA (3)  
Corr: 0.01 R2: 0  
Z-Score: 0.071 P-Value: 0.944

HBv2-Controls

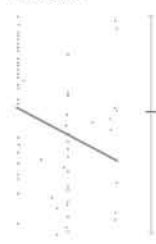

GG (28) GA (21) AA (10)  
Corr: -0.293 R2: 0.086  
Z-Score: -2.252 P-Value: 0.024

HBv2-ColiacDisease

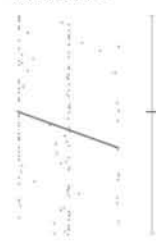

GG (41) GA (57) AA (13)  
Corr: -0.176 R2: 0.031  
Z-Score: -1.843 P-Value: 0.065

HBv2-ALS

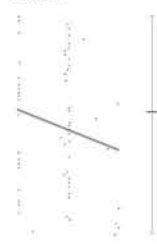

GG (20) GA (32) AA (7)  
Corr: -0.189 R2: 0.036  
Z-Score: -1.432 P-Value: 0.152

SNP rs2517713 (chr. 6, 30026078 bp)  
Probe 5390608 (chr. 17, 35313374 - 35329429 bp), GSDMB  
P-Value: 1.4E-8

HT12-Controls

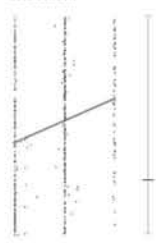

TT (150) TG (205) GG (59)  
Corr: 0.231 R2: 0.053  
Z-Score: 4.75 P-Value: 2.04E-6

HT12-COPD

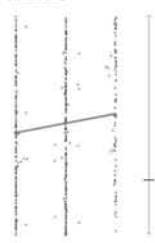

TT (182) TG (209) GG (82)  
Corr: 0.108 R2: 0.012  
Z-Score: 2.299 P-Value: 0.021

HT12-ALS

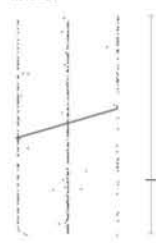

TT (98) TG (170) GG (56)  
Corr: 0.158 R2: 0.025  
Z-Score: 2.948 P-Value: 0.004

HT12-UC

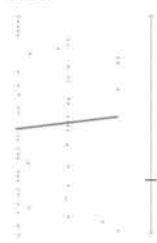

TT (27) TG (17) GG (5)  
Corr: 0.06 R2: 0.004  
Z-Score: 0.408 P-Value: 0.683

HBv2-Controls

eQTL not available  
Probe not present.

HBv2-ColiacDisease

eQTL not available  
Probe not present.

HBv2-ALS

eQTL not available  
Probe not present.

SNP rs4324798 (chr. 6, 28984096 bp)  
Probe IS30347 (chr. 22, 40348241 - 40399980 bp), XRCC6  
P-Value: 1.43E-8

HT12-Controls

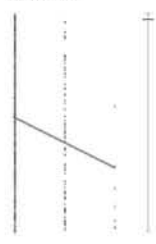

GG (324) GA (83) AA (7)  
Corr: -0.185 R2: 0.034  
Z-Score: -3.788 P-Value: 1.52E-4

HT12-COPD

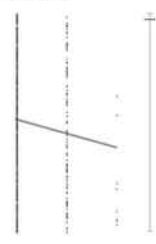

GG (348) GA (97) AA (8)  
Corr: -0.105 R2: 0.011  
Z-Score: -2.238 P-Value: 0.025

HT12-ALS

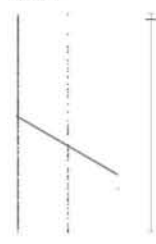

GG (253) GA (70) AA (1)  
Corr: -0.195 R2: 0.038  
Z-Score: -3.537 P-Value: 4.04E-4

HT12-UC

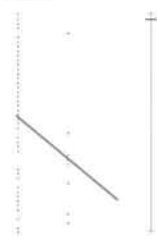

GG (41) GA (8) AA (9)  
Corr: -0.238 R2: 0.057  
Z-Score: -1.648 P-Value: 0.099

HBv2-Controls

eQTL not available  
Probe not present.

HBv2-CeliacDisease

eQTL not available  
Probe not present.

HBv2-ALS

eQTL not available  
Probe not present.

SNP rs9268877 (chr. 6, 32539125 bp)  
Probe 2940424 (chr. 7, 36518135 - 36731959 bp), AOH1  
P-Value: 1.36E-8

HT12-Controls

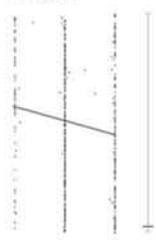

AA (81) AG (212) GG (141)  
Corr: -0.15 R2: 0.023  
Z-Score: -3.058 P-Value: 0.002

HT12-COPD

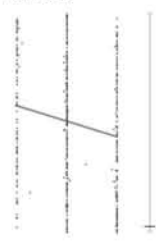

AA (91) AG (214) GG (148)  
Corr: -0.172 R2: 0.03  
Z-Score: -3.682 P-Value: 2.32E-4

HT12-ALS

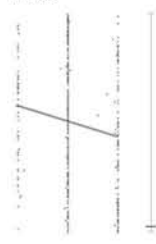

AA (50) AG (179) GG (95)  
Corr: -0.16 R2: 0.026  
Z-Score: -2.888 P-Value: 0.004

HT12-UC

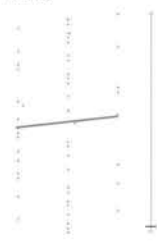

AA (16) AG (25) GG (9)  
Corr: 0.055 R2: 0.003  
Z-Score: 0.379 P-Value: 0.708

HBv2-Controls

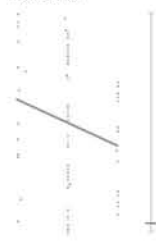

AA (13) AG (32) GG (14)  
Corr: -0.237 R2: 0.056  
Z-Score: -1.808 P-Value: 0.071

HBv2-CeliacDisease

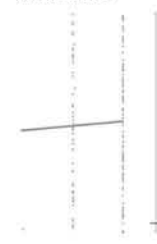

AA (11) AG (42) GG (88)  
Corr: 0.037 R2: 0.001  
Z-Score: 0.391 P-Value: 0.696

HBv2-ALS

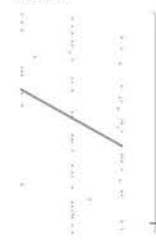

AA (10) AG (28) GG (21)  
Corr: -0.303 R2: 0.092  
Z-Score: -2.333 P-Value: 0.02

SNP rs12485738 (chr. 3, 56840616 bp)  
Probe 1410010 (chr. 10, 96898324 - 97041771 bp), FOLM1  
P-Value: 1.26E-8

HT12-Controls

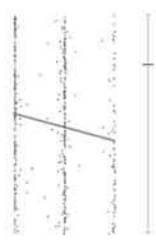

GG (153) GA (194) AA (67)  
Corr: -0.151 R2: 0.023  
Z-Score: -3.075 P-Value: 0.002

HT12-COPD

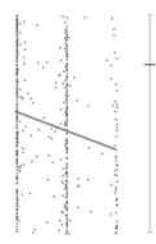

GG (202) GA (200) AA (51)  
Corr: -0.196 R2: 0.038  
Z-Score: -4.202 P-Value: 2.64E-5

HT12-ALS

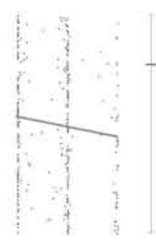

GG (132) GA (148) AA (44)  
Corr: -0.105 R2: 0.011  
Z-Score: -1.885 P-Value: 0.059

HT12-UC

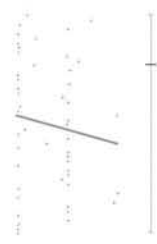

GG (24) GA (22) AA (3)  
Corr: -0.126 R2: 0.016  
Z-Score: -0.863 P-Value: 0.388

HBv2-Controls

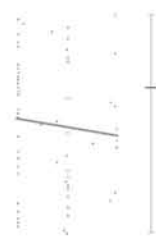

GG (28) GA (21) AA (10)  
Corr: -0.092 R2: 0.008  
Z-Score: -0.692 P-Value: 0.489

HBv2-CeliacDisease

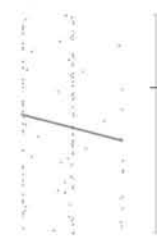

GG (41) GA (57) AA (110)  
Corr: -0.128 R2: 0.016  
Z-Score: -1.335 P-Value: 0.182

HBv2-ALS

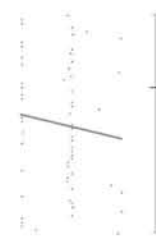

GG (28) GA (32) AA (7)  
Corr: -0.114 R2: 0.013  
Z-Score: -0.861 P-Value: 0.389

SNP rs12485738 (chr. 3, 56840616 bp)  
Probe 6770543 (chr. 16, 4947319 - 5010157 bp), SEC14L5  
P-Value: 1.19E-8

HT12-Controls

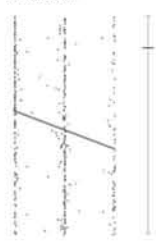

GG (153) GA (194) AA (67)  
Corr: -0.207 R2: 0.043  
Z-Score: -4.235 P-Value: 2.28E-5

HT12-COPD

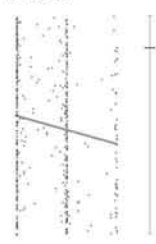

GG (202) GA (200) AA (51)  
Corr: -0.146 R2: 0.021  
Z-Score: -3.118 P-Value: 0.002

HT12-ALS

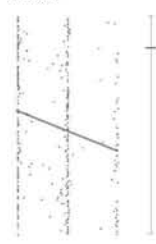

GG (132) GA (148) AA (44)  
Corr: -0.206 R2: 0.042  
Z-Score: -3.725 P-Value: 1.95E-4

HT12-UC

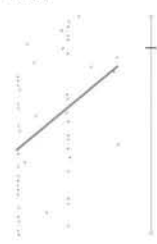

GG (24) GA (22) AA (3)  
Corr: 0.385 R2: 0.148  
Z-Score: 2.734 P-Value: 0.006

HBv2-Controls

eQTL not available  
Probe not present.

HBv2-CeliacDisease

eQTL not available  
Probe not present.

HBv2-ALS

eQTL not available  
Probe not present.

SNP rs12718387 (chr. 7, 50325922 bp)  
Probe 7200379 (chr. 12, 6748802 - 6751379 bp), PTMS  
P-Value: 1.12E-8

HT12-Controls

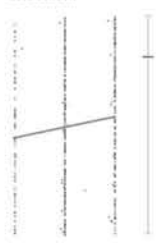

AA (94) AC (197) CC (153)  
Corr: 0.111 R2: 0.012  
Z-Score: 2.264 P-Value: 0.024

HT12-COPD

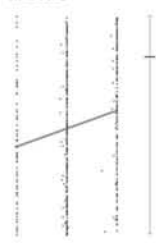

AA (88) AC (226) CC (159)  
Corr: 0.197 R2: 0.039  
Z-Score: 4.232 P-Value: 2.32E-5

HT12-ALS

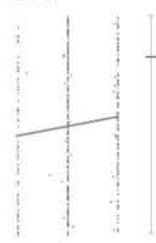

AA (56) AC (163) CC (105)  
Corr: 0.104 R2: 0.011  
Z-Score: 1.864 P-Value: 0.062

HT12-UC

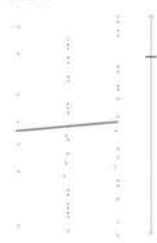

AA (7) AC (23) CC (119)  
Corr: 0.048 R2: 0.002  
Z-Score: 0.316 P-Value: 0.752

HBv2-Controls

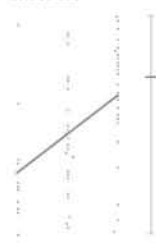

AA (11) AC (23) CC (25)  
Corr: 0.444 R2: 0.197  
Z-Score: 3.525 P-Value: 4.24E-4

HBv2-CeliacDisease

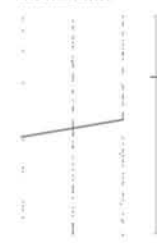

AA (11) AC (53) CC (47)  
Corr: 0.088 R2: 0.008  
Z-Score: 0.919 P-Value: 0.358

HBv2-ALS

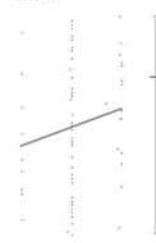

AA (9) AC (95) CC (15)  
Corr: 0.18 R2: 0.032  
Z-Score: 1.363 P-Value: 0.173

SNP rs2517713 (chr. 6, 30009078 bp)  
Probe 7150170 (chr. 6, 6840527 - 6844510 bp), AF203439.5/DEF11P/WF238378.A/DEF43  
P-Value 1.09E-8

HT12-Controls

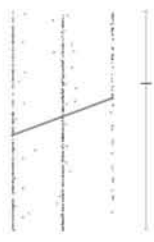

TT (150) TG (205) GG (58)  
Corr: 0.197 R2: 0.039  
Z-Score:4.029 P-Value:5.8E-5

HT12-COPD

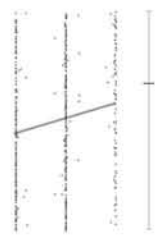

TT (102) TG (209) GG (82)  
Corr: 0.166 R2: 0.026  
Z-Score:3.556 P-Value:3.77E-4

HT12-ALS

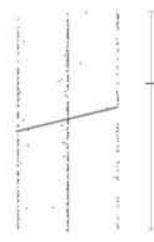

TT (96) TG (170) GG (56)  
Corr: 0.129 R2: 0.017  
Z-Score:2.327 P-Value:0.02

HT12-UC

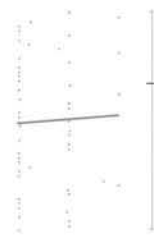

TT (27) TG (17) GG (5)  
Corr: 0.039 R2: 0.002  
Z-Score:0.264 P-Value:0.791

HBv2-Controls

eQTL not available  
Probe not present.

HBv2-ColicDisease

eQTL not available  
Probe not present.

HBv2-ALS

eQTL not available  
Probe not present.

SNP rs2523393 (chr. 6, 29613638 bp)  
Probe 7000274 (chr. 9, 118991711 - 118994970 bp), RPL10P3/MSNOHA/D/MSW129  
P-Value 1.1E-8

HT12-Controls

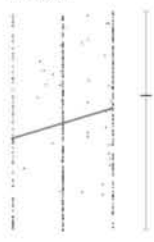

GG (72) GA (190) AA (140)  
Corr: 0.164 R2: 0.027  
Z-Score:3.349 P-Value:5.12E-4

HT12-COPD

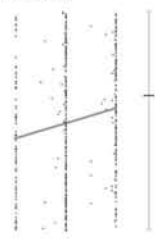

GG (75) GA (221) AA (157)  
Corr: 0.161 R2: 0.026  
Z-Score:3.433 P-Value:5.98E-4

HT12-ALS

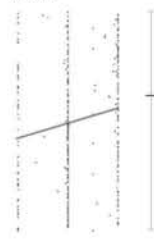

GG (83) GA (158) AA (113)  
Corr: 0.162 R2: 0.026  
Z-Score:2.918 P-Value:0.004

HT12-UC

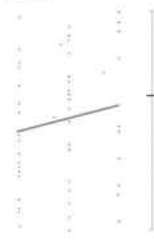

GG (18) GA (20) AA (11)  
Corr: 0.151 R2: 0.023  
Z-Score:1.026 P-Value:0.3

HBv2-Controls

eQTL not available  
Probe not present.

HBv2-ColicDisease

eQTL not available  
Probe not present.

HBv2-ALS

eQTL not available  
Probe not present.

SNP rs2944479 (chr. 6, 31690035 bp)  
Probe 1110300 (chr. 4, 193769727 - 193821641 bp), TMEM154  
P-Value 1.09E-8

HT12-Controls

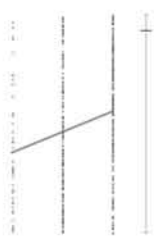

CC (42) CA (175) AA (197)  
Corr: 0.215 R2: 0.046  
Z-Score:4.405 P-Value:1.06E-5

HT12-COPD

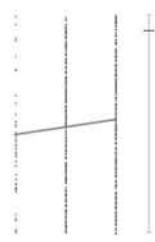

CC (39) CA (203) AA (211)  
Corr: 0.078 R2: 0.006  
Z-Score:1.625 P-Value:0.104

HT12-ALS

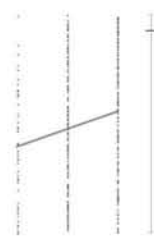

CC (48) CA (139) AA (137)  
Corr: 0.195 R2: 0.038  
Z-Score:3.53 P-Value:4.19E-4

HT12-UC

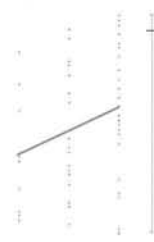

CC (9) CA (17) AA (25)  
Corr: 0.279 R2: 0.078  
Z-Score:1.939 P-Value:0.052

HBv2-Controls

eQTL not available  
Probe not present.

HBv2-ColicDisease

eQTL not available  
Probe not present.

HBv2-ALS

eQTL not available  
Probe not present.

SNP rs9420986 (chr. 6, 135469510 bp)  
Probe 6960615 (chr. 16, 1932977 - 1945672 bp), RPL3L  
P-Value 1.09E-8

HT12-Controls

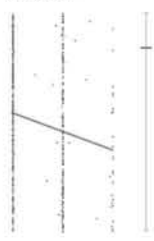

GG (218) GA (180) AA (27)  
Corr: -0.179 R2: 0.032  
Z-Score:3.664 P-Value:2.48E-4

HT12-COPD

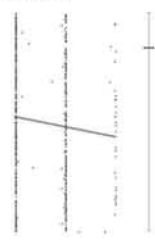

GG (235) GA (188) AA (30)  
Corr: -0.095 R2: 0.009  
Z-Score:2.012 P-Value:0.044

HT12-ALS

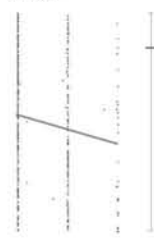

GG (179) GA (117) AA (28)  
Corr: -0.151 R2: 0.023  
Z-Score:2.715 P-Value:0.007

HT12-UC

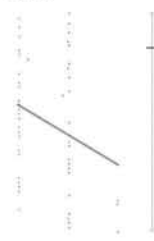

GG (24) GA (22) AA (3)  
Corr: -0.279 R2: 0.078  
Z-Score:1.938 P-Value:0.053

HBv2-Controls

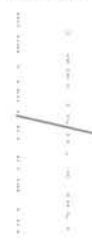

GG (30) GA (23) AA (6)  
Corr: -0.118 R2: 0.014  
Z-Score:0.893 P-Value:0.372

HBv2-ColicDisease

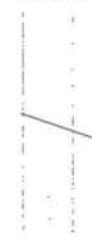

GG (62) GA (40) AA (9)  
Corr: -0.172 R2: 0.029  
Z-Score:1.801 P-Value:0.072

HBv2-ALS

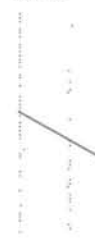

GG (38) GA (20) AA (1)  
Corr: -0.225 R2: 0.051  
Z-Score:1.713 P-Value:0.087

SNP rs1726785 (chr. 16, 67148731 bp)  
Probe 7650747 (chr. 1, 159693573 - 159695545 bp), ARHGAP30  
P-Value 1E-8

HT12-Controls

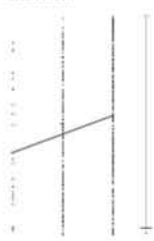

AA (24) AC (154) CC (230)  
Corr: 0.177 R2: 0.031  
Z-Score:3.626 P-Value:2.88E-4

HT12-COPD

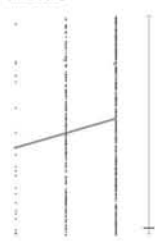

AA (20) AC (187) CC (286)  
Corr: 0.135 R2: 0.018  
Z-Score:2.886 P-Value:0.004

HT12-ALS

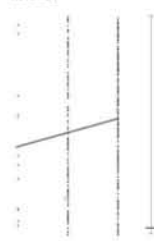

AA (12) AC (130) CC (182)  
Corr: 0.127 R2: 0.016  
Z-Score:2.294 P-Value:0.022

HT12-UC

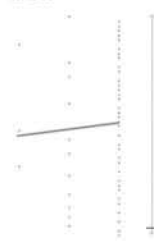

AA (8) AC (11) CC (35)  
Corr: 0.061 R2: 0.004  
Z-Score:0.417 P-Value:0.677

HBv2-Controls

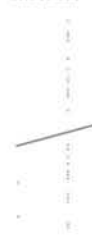

AA (2) AC (24) CC (33)  
Corr: 0.118 R2: 0.014  
Z-Score:0.893 P-Value:0.372

HBv2-ColicDisease

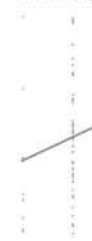

AA (8) AC (40) CC (83)  
Corr: 0.233 R2: 0.054  
Z-Score:2.46 P-Value:0.014

HBv2-ALS

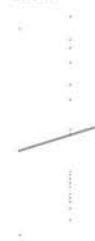

AA (2) AC (18) CC (38)  
Corr: 0.136 R2: 0.019  
Z-Score:1.628 P-Value:0.304



SNP rs495441 (chr. 6, 13546266 bp)  
Probe 8960615 (chr. 16, 1932977 - 1945672 bp), RPL3L  
P-Value 9.91E-9

HT12-Controls

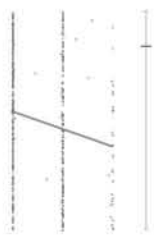

AA (217) AG (167) GG (30)  
Corr: -0.174 R2: 0.03  
Z-Score: -3.583 P-Value: 3.67E-4

HT12-COPD

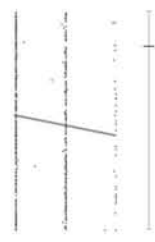

AA (295) AG (187) GG (31)  
Corr: -0.1 R2: 0.01  
Z-Score: -2.129 P-Value: 0.033

HT12-ALS

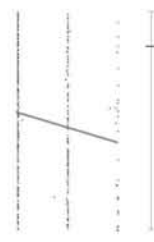

AA (178) AG (118) GG (28)  
Corr: -0.154 R2: 0.024  
Z-Score: -2.789 P-Value: 0.006

HT12-UC

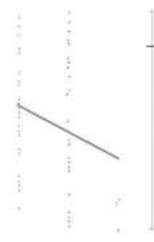

AA (22) AG (23) GG (3)  
Corr: -0.249 R2: 0.062  
Z-Score: -1.725 P-Value: 0.084

HBv2-Controls

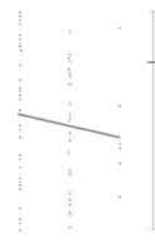

AA (20) AG (23) GG (6)  
Corr: -0.119 R2: 0.014  
Z-Score: -0.9 P-Value: 0.368

HBv2-ColicDisease

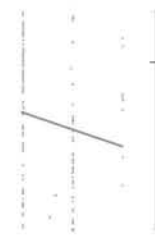

AA (62) AG (40) GG (9)  
Corr: -0.173 R2: 0.03  
Z-Score: -1.817 P-Value: 0.069

HBv2-ALS

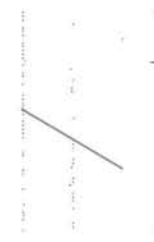

AA (37) AG (21) GG (11)  
Corr: -0.238 R2: 0.057  
Z-Score: -1.817 P-Value: 0.069

SNP rs9376092 (chr. 6, 13546937 bp)  
Probe 8960615 (chr. 16, 1932977 - 1945672 bp), RPL3L  
P-Value 9.94E-9

HT12-Controls

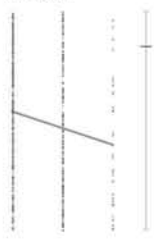

CC (218) CA (167) AA (31)  
Corr: -0.185 R2: 0.027  
Z-Score: -3.385 P-Value: 7.88E-4

HT12-COPD

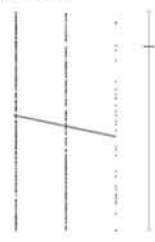

CC (230) CA (188) AA (31)  
Corr: -0.104 R2: 0.011  
Z-Score: -2.206 P-Value: 0.027

HT12-ALS

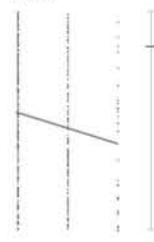

CC (178) CA (118) AA (28)  
Corr: -0.155 R2: 0.024  
Z-Score: -2.791 P-Value: 0.006

HT12-UC

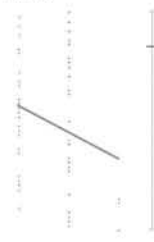

CC (23) CA (23) AA (3)  
Corr: -0.249 R2: 0.062  
Z-Score: -1.724 P-Value: 0.085

HBv2-Controls

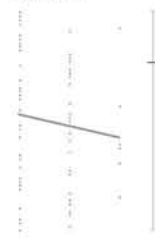

CC (30) CA (23) AA (6)  
Corr: -0.119 R2: 0.014  
Z-Score: -0.901 P-Value: 0.368

HBv2-ColicDisease

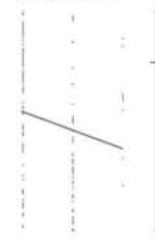

CC (62) CA (40) AA (9)  
Corr: -0.188 R2: 0.035  
Z-Score: -1.817 P-Value: 0.049

HBv2-ALS

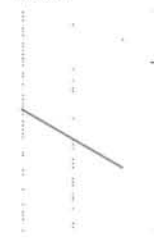

CC (37) CA (21) AA (11)  
Corr: -0.237 R2: 0.056  
Z-Score: -1.805 P-Value: 0.071

SNP rs9373124 (chr. 6, 13546492 bp)  
Probe 8960615 (chr. 16, 1932977 - 1945672 bp), RPL3L  
P-Value 9.56E-9

HT12-Controls

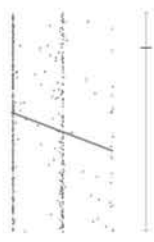

TT (220) TC (169) CC (25)  
Corr: -0.179 R2: 0.032  
Z-Score: -3.656 P-Value: 2.57E-4

HT12-COPD

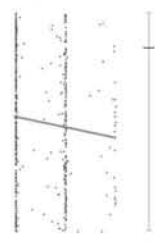

TT (236) TC (188) CC (29)  
Corr: -0.097 R2: 0.009  
Z-Score: -2.056 P-Value: 0.04

HT12-ALS

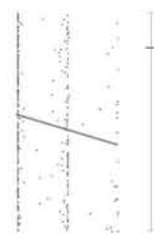

TT (182) TC (118) CC (28)  
Corr: -0.149 R2: 0.022  
Z-Score: -2.689 P-Value: 0.007

HT12-UC

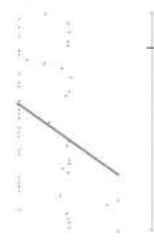

TT (24) TC (22) CC (3)  
Corr: -0.317 R2: 0.101  
Z-Score: -2.222 P-Value: 0.026

HBv2-Controls

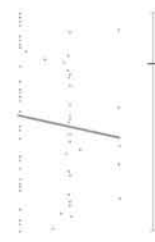

TT (30) TC (24) CC (5)  
Corr: -0.11 R2: 0.012  
Z-Score: -0.826 P-Value: 0.409

HBv2-ColicDisease

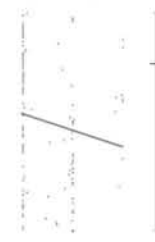

TT (63) TC (39) CC (9)  
Corr: -0.158 R2: 0.025  
Z-Score: -1.659 P-Value: 0.097

HBv2-ALS

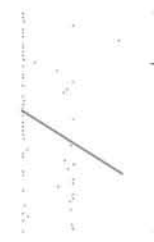

TT (38) TC (20) CC (11)  
Corr: -0.236 R2: 0.056  
Z-Score: -1.798 P-Value: 0.072

SNP rs11171739 (chr. 12, 54756892 bp)  
Probe 3310592 (chr. 7, 98917628 - 98936260 bp), ZNF788/ZNF394  
P-Value 9.22E-9

HT12-Controls

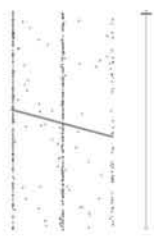

TT (158) TC (190) CC (60)  
Corr: -0.144 R2: 0.021  
Z-Score: -2.928 P-Value: 0.003

HT12-COPD

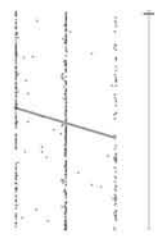

TT (153) TC (225) CC (75)  
Corr: -0.159 R2: 0.025  
Z-Score: -3.402 P-Value: 6.88E-4

HT12-ALS

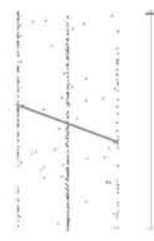

TT (102) TC (174) CC (68)  
Corr: -0.191 R2: 0.036  
Z-Score: -3.454 P-Value: 5.53E-4

HT12-UC

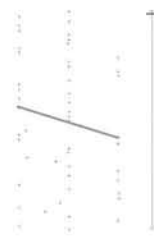

TT (16) TC (24) CC (9)  
Corr: -0.167 R2: 0.028  
Z-Score: -1.149 P-Value: 0.25

HBv2-Controls

eQTL not available  
Probe not present.

HBv2-ColicDisease

eQTL not available  
Probe not present.

HBv2-ALS

eQTL not available  
Probe not present.

SNP rs602875 (chr. 6, 32081807 bp)  
Probe 2640424 (chr. 7, 36518135 - 36731595 bp), AOH1  
P-Value 8.85E-9

HT12-Controls

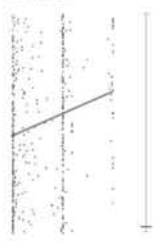

AA (221) AG (165) GG (28)  
Corr: 0.208 R2: 0.043  
Z-Score: 4.268 P-Value: 1.97E-5

HT12-COPD

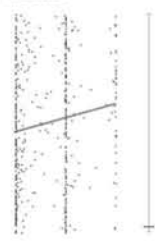

AA (228) AG (179) GG (48)  
Corr: 0.144 R2: 0.021  
Z-Score: 3.077 P-Value: 0.002

HT12-ALS

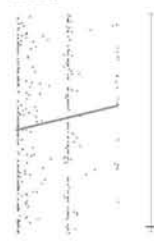

AA (183) AG (121) GG (20)  
Corr: 0.112 R2: 0.013  
Z-Score: 2.017 P-Value: 0.044

HT12-UC

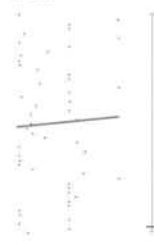

AA (23) AG (22) GG (4)  
Corr: 0.048 R2: 0.002  
Z-Score: 0.317 P-Value: 0.751

HBv2-Controls

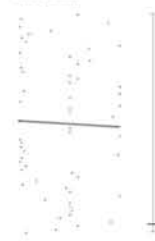

AA (25) AG (26) GG (10)  
Corr: -0.028 R2: 0.001  
Z-Score: -0.211 P-Value: 0.833

HBv2-ColicDisease

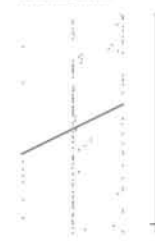

AA (8) AG (69) GG (34)  
Corr: 0.217 R2: 0.047  
Z-Score: 2.287 P-Value: 0.022

HBv2-ALS

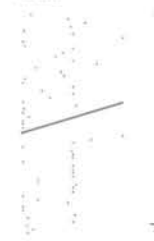

AA (27) AG (30) GG (29)  
Corr: 0.126 R2: 0.016  
Z-Score: 0.949 P-Value: 0.343

SNP rs615872 (chr. 6, 32682149 bp)  
 Probe 2940424 (chr. 7, 36518133 - 36731593 bp), AOH1  
 P-Value 8.95E-9

HT12-Controls

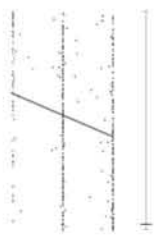

CC (50) CG (104) GG (174)  
 Corr: 0.232 R2: 0.054  
 Z-Score: 4.771 P-Value: 1.83E-6

HT12-COPD

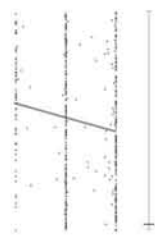

CC (68) CG (100) GG (191)  
 Corr: 0.15 R2: 0.023  
 Z-Score: 3.268 P-Value: 0.001

HT12-ALS

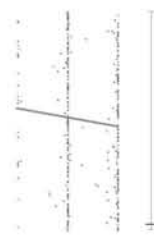

CC (20) CG (150) GG (142)  
 Corr: 0.098 R2: 0.008  
 Z-Score: 1.579 P-Value: 0.114

HT12-UC

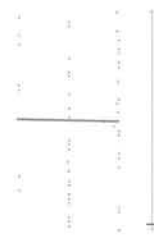

CC (7) CG (21) GG (21)  
 Corr: 0.01 R2: 0  
 Z-Score: 0.071 P-Value: 0.944

HBv2-Controls

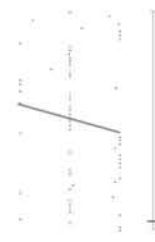

CC (9) CG (30) GG (20)  
 Corr: 0.142 R2: 0.02  
 Z-Score: 1.073 P-Value: 0.283

HBv2-ColicDisease

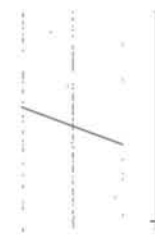

CC (36) CG (69) GG (7)  
 Corr: 0.16 R2: 0.026  
 Z-Score: 1.663 P-Value: 0.092

HBv2-ALS

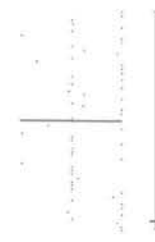

CC (4) CG (30) GG (25)  
 Corr: 0.005 R2: 0  
 Z-Score: 0.034 P-Value: 0.973

SNP rs1244268 (chr. 16, 20250073 bp)  
 Probe 1820096 (chr. 23, 144589943 - 144589943 bp),  
 P-Value 8.87E-9

HT12-Controls

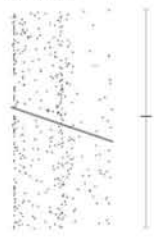

TT (175) TA (200) AA (39)  
 Corr: 0.149 R2: 0.022  
 Z-Score: 3.04 P-Value: 0.002

HT12-COPD

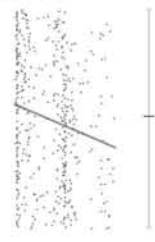

TT (100) TA (210) AA (41)  
 Corr: 0.182 R2: 0.033  
 Z-Score: 3.9 P-Value: 9.64E-5

HT12-ALS

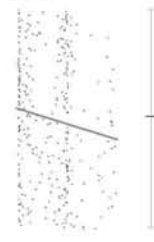

TT (139) TA (157) AA (28)  
 Corr: 0.132 R2: 0.017  
 Z-Score: 2.369 P-Value: 0.018

HT12-UC

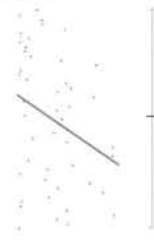

TT (21) TA (21) AA (7)  
 Corr: 0.306 R2: 0.093  
 Z-Score: 2.136 P-Value: 0.033

HBv2-Controls

eQTL not available  
 Probe not present.

HBv2-ColicDisease

eQTL not available  
 Probe not present.

HBv2-ALS

eQTL not available  
 Probe not present.

SNP rs2517713 (chr. 6, 30026078 bp)  
 Probe 3290310 (chr. 1, 52028472 - 52117974 bp), NR1D1  
 P-Value 8.30E-9

HT12-Controls

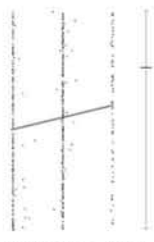

TT (150) TG (205) GG (59)  
 Corr: 0.125 R2: 0.016  
 Z-Score: 2.543 P-Value: 0.011

HT12-COPD

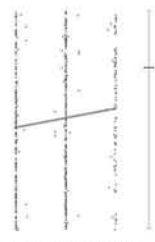

TT (162) TG (206) GG (82)  
 Corr: 0.108 R2: 0.012  
 Z-Score: 2.29 P-Value: 0.022

HT12-ALS

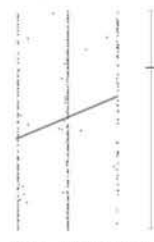

TT (96) TG (170) GG (56)  
 Corr: 0.223 R2: 0.05  
 Z-Score: 4.052 P-Value: 5.09E-5

HT12-UC

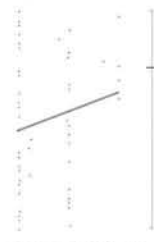

TT (27) TG (17) GG (5)  
 Corr: 0.19 R2: 0.036  
 Z-Score: 1.306 P-Value: 0.191

HBv2-Controls

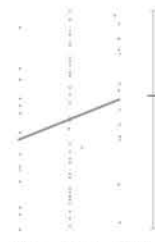

TT (14) TG (32) GG (13)  
 Corr: 0.212 R2: 0.045  
 Z-Score: 1.612 P-Value: 0.107

HBv2-ColicDisease

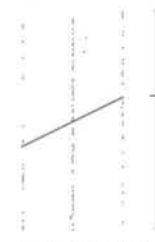

TT (20) TG (62) GG (25)  
 Corr: 0.256 R2: 0.066  
 Z-Score: 2.711 P-Value: 0.007

HBv2-ALS

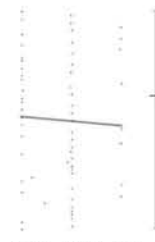

TT (23) TG (28) GG (6)  
 Corr: 0.05 R2: 0.002  
 Z-Score: 0.372 P-Value: 0.71

SNP rs1701704 (chr. 12, 54688754 bp)  
 Probe 3450750 (chr. 19, 62729505 - 62744936 bp), ZNF549  
 P-Value 8.11E-9

HT12-Controls

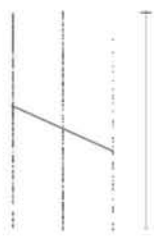

TT (193) TG (178) GG (43)  
 Corr: -0.232 R2: 0.054  
 Z-Score: 4.776 P-Value: 1.79E-6

HT12-COPD

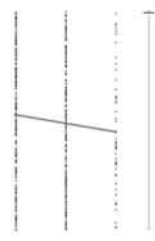

TT (198) TG (206) GG (51)  
 Corr: -0.092 R2: 0.008  
 Z-Score: 1.95 P-Value: 0.051

HT12-ALS

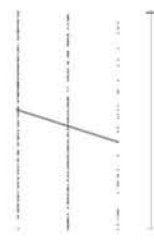

TT (145) TG (140) GG (33)  
 Corr: -0.167 R2: 0.008  
 Z-Score: 3.018 P-Value: 0.003

HT12-UC

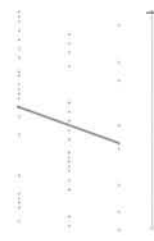

TT (22) TG (18) GG (9)  
 Corr: -0.308 R2: 0.043  
 Z-Score: 1.433 P-Value: 0.152

HBv2-Controls

eQTL not available  
 Probe not present.

HBv2-ColicDisease

eQTL not available  
 Probe not present.

HBv2-ALS

eQTL not available  
 Probe not present.

SNP rs9268877 (chr. 6, 32530125 bp)  
 Probe 2120746 (chr. 7, 142003303 - 142005921 bp), ENST00000390392  
 P-Value 7.72E-9

HT12-Controls

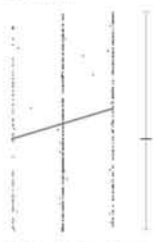

AA (91) AG (212) GG (141)  
 Corr: 0.158 R2: 0.025  
 Z-Score: 3.234 P-Value: 0.001

HT12-COPD

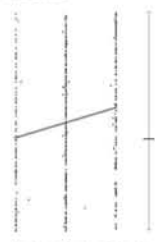

AA (91) AG (214) GG (148)  
 Corr: 0.169 R2: 0.028  
 Z-Score: 3.607 P-Value: 3.1E-4

HT12-ALS

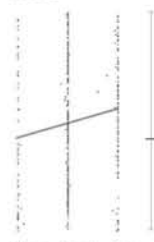

AA (50) AG (179) GG (95)  
 Corr: 0.146 R2: 0.021  
 Z-Score: 2.64 P-Value: 0.008

HT12-UC

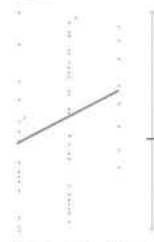

AA (16) AG (25) GG (8)  
 Corr: 0.276 R2: 0.076  
 Z-Score: 1.917 P-Value: 0.055

HBv2-Controls

eQTL not available  
 Probe not present.

HBv2-ColicDisease

eQTL not available  
 Probe not present.

HBv2-ALS

eQTL not available  
 Probe not present.

SNP rs12485738 (chr. 3, 56840616 bp)  
Probe 620750 (chr. 7, 134113711 - 134307010 tel), CALD1  
P-Value 7.49E-9

HT12-Controls

HT12-COPD

HT12-ALS

HT12-UC

HBv2-Controls

HBv2-ColicDisease

HBv2-ALS

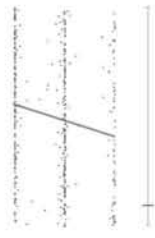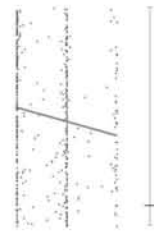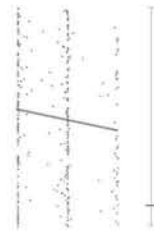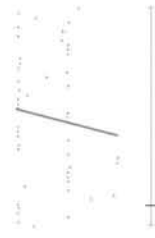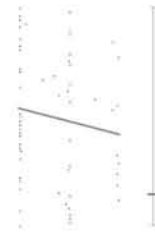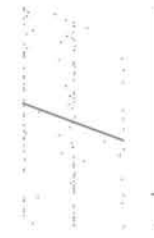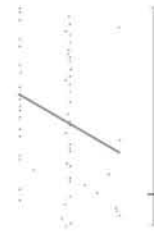

GG (153) GA (194) AA (67)  
Corr: -0.171 R2: 0.029  
Z-Score: -3.493 P-Value: 4.77E-4

GG (202) GA (200) AA (51)  
Corr: -0.144 R2: 0.021  
Z-Score: -3.06 P-Value: 0.002

GG (132) GA (148) AA (44)  
Corr: -0.106 R2: 0.011  
Z-Score: -1.912 P-Value: 0.056

GG (24) GA (22) AA (3)  
Corr: -0.119 R2: 0.014  
Z-Score: -0.816 P-Value: 0.414

GG (26) GA (21) AA (10)  
Corr: -0.144 R2: 0.021  
Z-Score: -1.099 P-Value: 0.276

GG (41) GA (57) AA (13)  
Corr: -0.184 R2: 0.034  
Z-Score: -1.93 P-Value: 0.054

GG (26) GA (32) AA (7)  
Corr: -0.277 R2: 0.077  
Z-Score: -2.127 P-Value: 0.033

SNP rs713893 (chr. 12, 48333735 bp)  
Probe Human\_FistSeq\_8\_v2.2200094 (chr. 4, 11095115 - 11096340 bp), GAR1  
P-Value 6.75E-9

HT12-Controls

HT12-COPD

HT12-ALS

HT12-UC

HBv2-Controls

HBv2-ColicDisease

HBv2-ALS

eQTL not available  
Probe not present

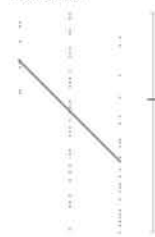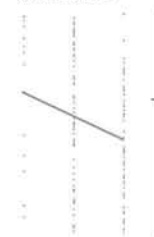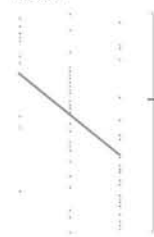

AA (8) AG (26) GG (23)  
Corr: -0.526 R2: 0.277  
Z-Score: -4.282 P-Value: 1.85E-5

AA (13) AG (51) GG (17)  
Corr: -0.244 R2: 0.06  
Z-Score: -2.585 P-Value: 0.01

AA (10) AG (26) GG (23)  
Corr: -0.453 R2: 0.205  
Z-Score: -3.599 P-Value: 3.19E-4

SNP rs11171739 (chr. 12, 54756892 bp)  
Probe 3940500 (chr. 2, 19413728 - 19422865 bp), OSR1  
P-Value 6.25E-9

HT12-Controls

HT12-COPD

HT12-ALS

HT12-UC

HBv2-Controls

HBv2-ColicDisease

HBv2-ALS

eQTL not available  
Probe not present

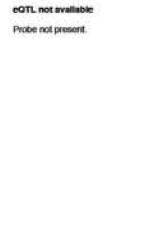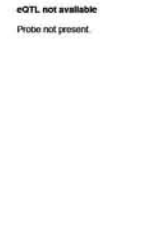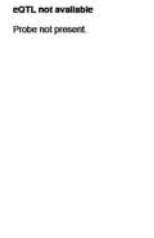

TT (158) TC (196) CC (60)  
Corr: 0.179 R2: 0.032  
Z-Score: 3.657 P-Value: 2.55E-4

TT (153) TC (225) CC (75)  
Corr: 0.12 R2: 0.014  
Z-Score: 2.551 P-Value: 0.011

TT (102) TC (174) CC (48)  
Corr: 0.171 R2: 0.029  
Z-Score: 3.067 P-Value: 0.002

TT (18) TC (24) CC (9)  
Corr: 0.403 R2: 0.162  
Z-Score: 2.87 P-Value: 0.004

eQTL not available  
Probe not present

eQTL not available  
Probe not present

eQTL not available  
Probe not present

SNP rs12485738 (chr. 3, 56840616 bp)  
Probe 2070369 (chr. 6, 41294061 - 41231053 bp), RP1-298023.3  
P-Value 6.19E-9

HT12-Controls

HT12-COPD

HT12-ALS

HT12-UC

HBv2-Controls

HBv2-ColicDisease

HBv2-ALS

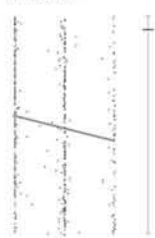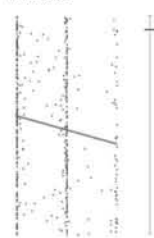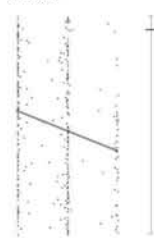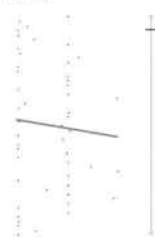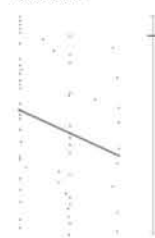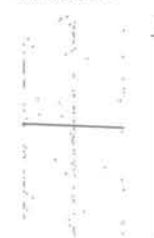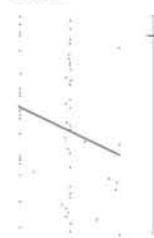

GG (153) GA (194) AA (67)  
Corr: -0.137 R2: 0.019  
Z-Score: -2.794 P-Value: 0.005

GG (202) GA (200) AA (51)  
Corr: -0.142 R2: 0.02  
Z-Score: -3.036 P-Value: 0.002

GG (132) GA (148) AA (44)  
Corr: -0.206 R2: 0.042  
Z-Score: -3.734 P-Value: 1.89E-4

GG (24) GA (22) AA (3)  
Corr: -0.078 R2: 0.006  
Z-Score: -0.533 P-Value: 0.594

GG (26) GA (21) AA (10)  
Corr: -0.256 R2: 0.066  
Z-Score: -1.961 P-Value: 0.05

GG (41) GA (57) AA (13)  
Corr: -0.019 R2: 0  
Z-Score: -0.194 P-Value: 0.846

GG (26) GA (32) AA (7)  
Corr: -0.229 R2: 0.052  
Z-Score: -1.745 P-Value: 0.081

SNP rs11022954 (chr. 11, 192856 bp)  
Probe 2230241 (chr. 6, 6086310 - 6266923 bp), F13A1  
P-Value 5.68E-9

HT12-Controls

HT12-COPD

HT12-ALS

HT12-UC

HBv2-Controls

HBv2-ColicDisease

HBv2-ALS

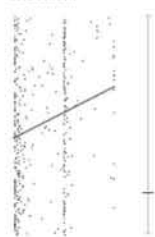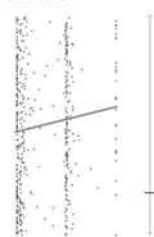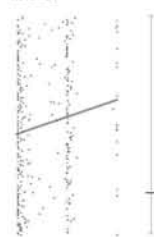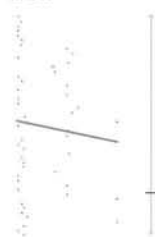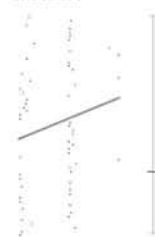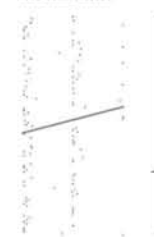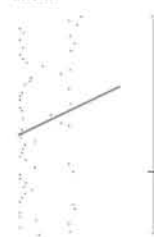

GG (248) GA (143) AA (23)  
Corr: 0.219 R2: 0.048  
Z-Score: 2.489 P-Value: 7.16E-6

GG (261) GA (165) AA (27)  
Corr: 0.117 R2: 0.014  
Z-Score: 2.486 P-Value: 0.013

GG (199) GA (116) AA (18)  
Corr: 0.153 R2: 0.024  
Z-Score: 2.768 P-Value: 0.006

GG (31) GA (15) AA (3)  
Corr: -0.095 R2: 0.009  
Z-Score: 0.65 P-Value: 0.516

GG (26) GA (29) AA (4)  
Corr: 0.183 R2: 0.033  
Z-Score: 1.385 P-Value: 0.166

GG (56) GA (47) AA (8)  
Corr: 0.123 R2: 0.015  
Z-Score: 1.262 P-Value: 0.2

GG (40) GA (19) AA (3)  
Corr: 0.162 R2: 0.026  
Z-Score: 1.226 P-Value: 0.22

SNP rs643381 (chr. 6, 139881116 bp)  
Probe 270133 (chr. 1, 23976470 - 23988309 bp), C1orf128  
P-Value 4.9E-9

HT12-Controls

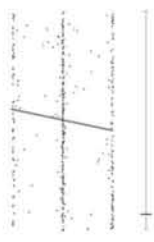

AA (82) AC (210) CC (110)  
Corr: -0.112 R2: 0.012  
Z-Score: 2.274 P-Value: 0.023

HT12-COPD

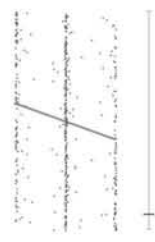

AA (110) AC (230) CC (101)  
Corr: -0.191 R2: 0.037  
Z-Score: 4.069 P-Value: 4.16E-5

HT12-ALS

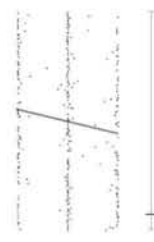

AA (95) AC (149) CC (80)  
Corr: -0.139 R2: 0.019  
Z-Score: 2.501 P-Value: 0.012

HT12-UC

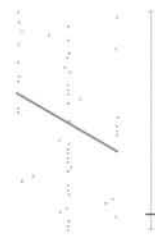

AA (11) AC (29) CC (9)  
Corr: -0.274 R2: 0.075  
Z-Score: 1.908 P-Value: 0.056

HBv2-Controls

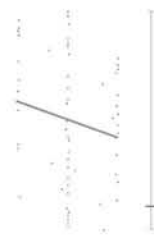

AA (11) AC (31) CC (17)  
Corr: -0.188 R2: 0.036  
Z-Score: 1.429 P-Value: 0.153

HBv2-ColiacDisease

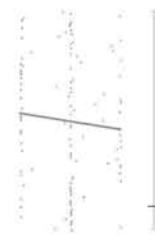

AA (30) AC (57) CC (24)  
Corr: -0.08 R2: 0.006  
Z-Score: 0.831 P-Value: 0.406

HBv2-ALS

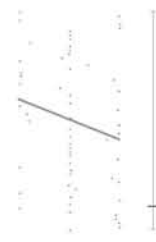

AA (14) AC (28) CC (12)  
Corr: -0.216 R2: 0.047  
Z-Score: 1.645 P-Value: 0.1

SNP rs7847305 (chr. 3, 187316984 bp)  
Probe 540184 (chr. 4, 181858620 - 181858620 bp), -  
P-Value 4.85E-9

HT12-Controls

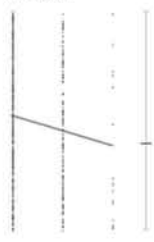

CC (266) CT (132) TT (16)  
Corr: -0.134 R2: 0.018  
Z-Score: 2.725 P-Value: 0.006

HT12-COPD

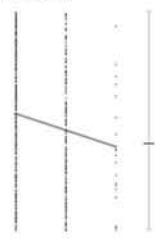

CC (260) CT (170) TT (20)  
Corr: -0.155 R2: 0.024  
Z-Score: 3.318 P-Value: 9.09E-4

HT12-ALS

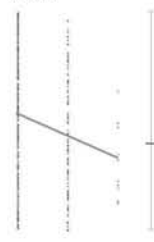

CC (218) CT (96) TT (10)  
Corr: -0.188 R2: 0.035  
Z-Score: 3.402 P-Value: 6.69E-4

HT12-UC

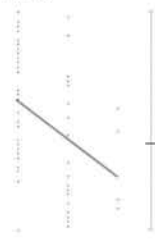

CC (27) CT (18) TT (4)  
Corr: -0.38 R2: 0.144  
Z-Score: 2.692 P-Value: 0.007

HBv2-Controls

eQTL not available  
Probe not present.

HBv2-ColiacDisease

eQTL not available  
Probe not present.

HBv2-ALS

eQTL not available  
Probe not present.

SNP rs628751 (chr. 6, 139880112 bp)  
Probe 270133 (chr. 1, 23976470 - 23988309 bp), C1orf128  
P-Value 4.75E-9

HT12-Controls

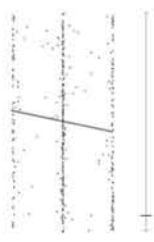

AA (82) AC (210) CC (110)  
Corr: -0.112 R2: 0.013  
Z-Score: 2.28 P-Value: 0.023

HT12-COPD

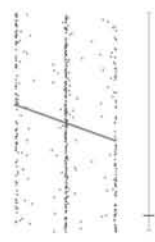

AA (110) AC (230) CC (101)  
Corr: -0.192 R2: 0.037  
Z-Score: 4.111 P-Value: 3.95E-5

HT12-ALS

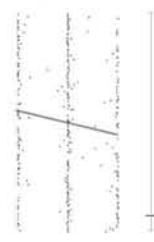

AA (95) AC (149) CC (80)  
Corr: -0.138 R2: 0.019  
Z-Score: 2.494 P-Value: 0.013

HT12-UC

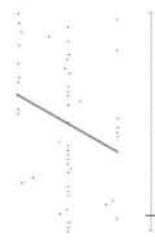

AA (11) AC (29) CC (9)  
Corr: -0.274 R2: 0.075  
Z-Score: 1.906 P-Value: 0.057

HBv2-Controls

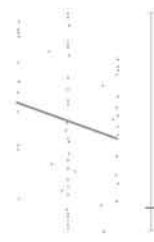

AA (11) AC (31) CC (17)  
Corr: -0.188 R2: 0.035  
Z-Score: 1.426 P-Value: 0.154

HBv2-ColiacDisease

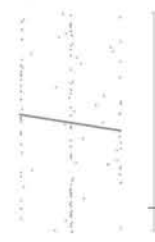

AA (30) AC (57) CC (24)  
Corr: -0.08 R2: 0.006  
Z-Score: 0.831 P-Value: 0.406

HBv2-ALS

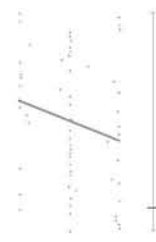

AA (14) AC (28) CC (12)  
Corr: -0.217 R2: 0.047  
Z-Score: 1.648 P-Value: 0.099

SNP rs12485738 (chr. 3, 56840616 bp)  
Probe 4250703 (chr. 7, 128570946 - 12859907 bp), TSPAN33  
P-Value 4.66E-9

HT12-Controls

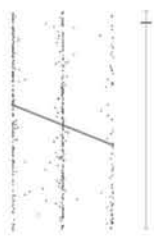

GG (153) GA (194) AA (67)  
Corr: -0.219 R2: 0.048  
Z-Score: 4.488 P-Value: 7.14E-6

HT12-COPD

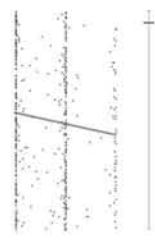

GG (202) GA (200) AA (51)  
Corr: -0.114 R2: 0.013  
Z-Score: 2.425 P-Value: 0.015

HT12-ALS

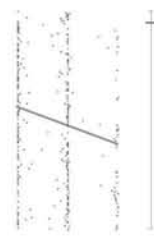

GG (132) GA (148) AA (44)  
Corr: -0.192 R2: 0.037  
Z-Score: 3.471 P-Value: 5.19E-4

HT12-UC

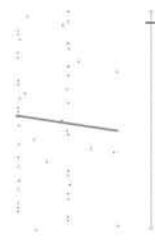

GG (24) GA (22) AA (3)  
Corr: -0.068 R2: 0.004  
Z-Score: 0.432 P-Value: 0.651

HBv2-Controls

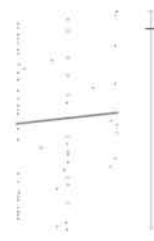

GG (26) GA (21) AA (10)  
Corr: 0.06 R2: 0.004  
Z-Score: 0.45 P-Value: 0.653

HBv2-ColiacDisease

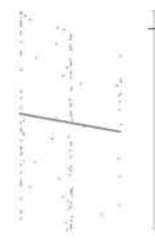

GG (41) GA (57) AA (13)  
Corr: -0.089 R2: 0.008  
Z-Score: 0.926 P-Value: 0.354

HBv2-ALS

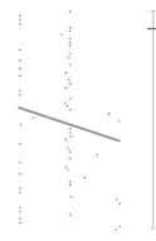

GG (20) GA (32) AA (7)  
Corr: -0.161 R2: 0.026  
Z-Score: 1.215 P-Value: 0.224

SNP rs11171739 (chr. 12, 54756892 bp)  
Probe 4780424 (chr. 19, 43000562 - 4320435 bp), ER3K  
P-Value 4.58E-9

HT12-Controls

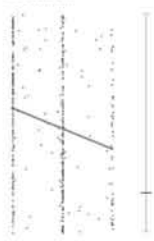

TT (158) TC (196) CC (60)  
Corr: -0.216 R2: 0.046  
Z-Score: 4.426 P-Value: 9.61E-6

HT12-COPD

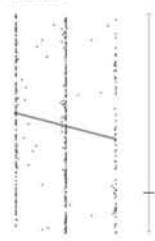

TT (153) TC (225) CC (75)  
Corr: -0.137 R2: 0.019  
Z-Score: 2.919 P-Value: 0.004

HT12-ALS

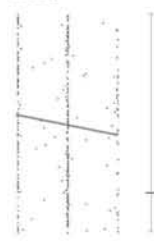

TT (102) TC (174) CC (48)  
Corr: -0.105 R2: 0.011  
Z-Score: 1.888 P-Value: 0.059

HT12-UC

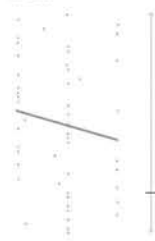

TT (16) TC (24) CC (9)  
Corr: -0.158 R2: 0.025  
Z-Score: 1.085 P-Value: 0.278

HBv2-Controls

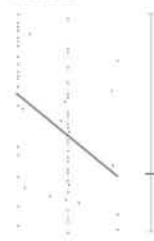

TT (22) TC (32) CC (5)  
Corr: -0.378 R2: 0.143  
Z-Score: 2.957 P-Value: 0.003

HBv2-ColiacDisease

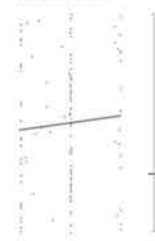

TT (33) TC (59) CC (19)  
Corr: 0.071 R2: 0.005  
Z-Score: 0.743 P-Value: 0.457

HBv2-ALS

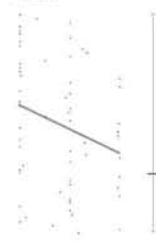

TT (24) TC (25) CC (10)  
Corr: -0.268 R2: 0.072  
Z-Score: 2.048 P-Value: 0.041

SNP rs2523393 (chr. 6, 29613638 bp)  
Probe 4230441 (chr. 16, 56258658 - 56262476 bp), GPR17  
P-Value 4.35E-9

HT12-Controls

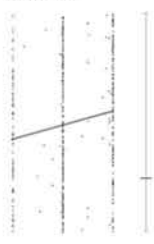

GG (75) GA (196) AA (140)  
Corr: 0.155 R2: 0.024  
Z-Score:3.173 P-Value:0.002

HT12-COPD

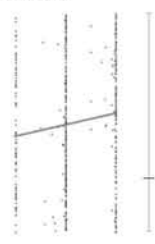

GG (75) GA (221) AA (157)  
Corr: 0.123 R2: 0.015  
Z-Score:2.612 P-Value:0.009

HT12-ALS

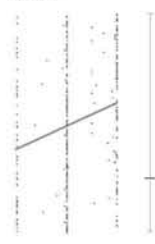

GG (50) GA (158) AA (113)  
Corr: 0.245 R2: 0.06  
Z-Score:4.456 P-Value:5.35E-6

HT12-UC

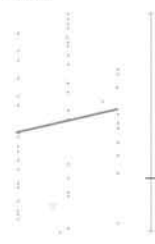

GG (18) GA (20) AA (11)  
Corr: 0.131 R2: 0.017  
Z-Score:0.9 P-Value:0.368

HBv2-Controls

eQTL not available  
Probe not present.

HBv2-ColicDisease

eQTL not available  
Probe not present.

HBv2-ALS

eQTL not available  
Probe not present.

SNP rs2517713 (chr. 6, 30069078 bp)  
Probe 6760209 (chr. 6, 136620419 - 136653692 bp), CTA211L3.1  
P-Value 4.27E-9

HT12-Controls

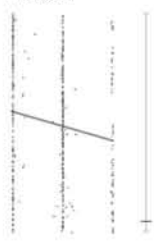

TT (150) TG (209) GG (59)  
Corr: -0.156 R2: 0.024  
Z-Score:-3.182 P-Value:0.001

HT12-COPD

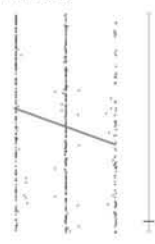

TT (162) TG (209) GG (82)  
Corr: -0.202 R2: 0.041  
Z-Score:-4.338 P-Value:1.44E-5

HT12-ALS

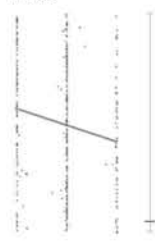

TT (98) TG (170) GG (56)  
Corr: -0.174 R2: 0.03  
Z-Score:-3.137 P-Value:0.002

HT12-UC

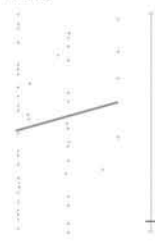

TT (27) TG (17) GG (9)  
Corr: 0.141 R2: 0.02  
Z-Score:0.965 P-Value:0.335

HBv2-Controls

eQTL not available  
Probe not present.

HBv2-ColicDisease

eQTL not available  
Probe not present.

HBv2-ALS

eQTL not available  
Probe not present.

SNP rs2523393 (chr. 6, 29613638 bp)  
Probe 5000044 (chr. 3, 101939850 - 101951500 bp), TFG  
P-Value 4.29E-9

HT12-Controls

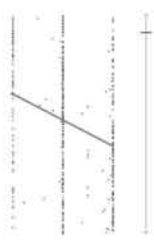

GG (72) GA (196) AA (148)  
Corr: -0.287 R2: 0.083  
Z-Score:-5.957 P-Value:2.56E-9

HT12-COPD

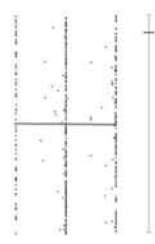

GG (75) GA (221) AA (157)  
Corr: -0.009 R2: 0  
Z-Score:-0.192 P-Value:0.848

HT12-ALS

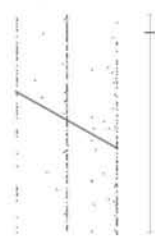

GG (50) GA (158) AA (113)  
Corr: -0.301 R2: 0.091  
Z-Score:-5.53 P-Value:3.2E-8

HT12-UC

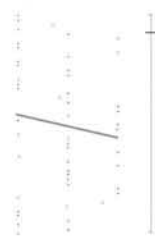

GG (18) GA (20) AA (11)  
Corr: -0.136 R2: 0.018  
Z-Score:-0.93 P-Value:0.352

HBv2-Controls

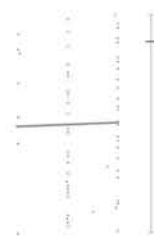

GG (7) GA (25) AA (27)  
Corr: 0.023 R2: 0.001  
Z-Score:0.173 P-Value:0.863

HBv2-ColicDisease

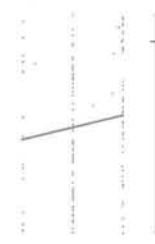

GG (14) GA (54) AA (43)  
Corr: 0.125 R2: 0.016  
Z-Score:1.306 P-Value:0.191

HBv2-ALS

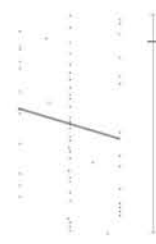

GG (12) GA (32) AA (15)  
Corr: -0.157 R2: 0.025  
Z-Score:-1.19 P-Value:0.234

SNP rs1900493 (chr. 6, 32471193 bp)  
Probe 6380347 (chr. 25, 40346241 - 40390996 bp), XFCC6  
P-Value 3.67E-9

HT12-Controls

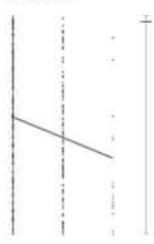

TT (94) TC (135) CC (15)  
Corr: -0.181 R2: 0.033  
Z-Score:-3.697 P-Value:2.18E-4

HT12-COPD

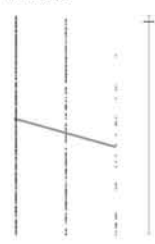

TT (277) TC (150) CC (26)  
Corr: -0.134 R2: 0.018  
Z-Score:-2.864 P-Value:0.004

HT12-ALS

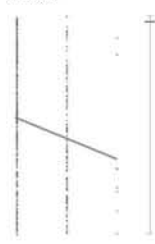

TT (113) TC (103) CC (8)  
Corr: -0.172 R2: 0.029  
Z-Score:-3.102 P-Value:0.002

HT12-UC

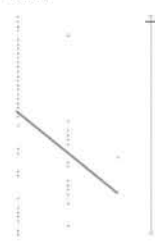

TT (34) TC (14) CC (1)  
Corr: -0.319 R2: 0.102  
Z-Score:-2.237 P-Value:0.025

HBv2-Controls

eQTL not available  
Probe not present.

HBv2-ColicDisease

eQTL not available  
Probe not present.

HBv2-ALS

eQTL not available  
Probe not present.

SNP rs620751 (chr. 6, 139680112 bp)  
Probe 2450647 (chr. 12, 51353787 - 51361458 bp), KRT11  
P-Value 3.09E-9

HT12-Controls

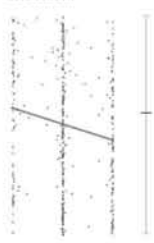

AA (82) AC (216) CC (116)  
Corr: -0.166 R2: 0.028  
Z-Score:-3.4 P-Value:6.74E-4

HT12-COPD

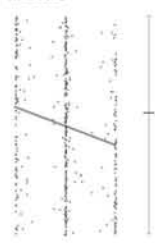

AA (116) AC (236) CC (107)  
Corr: -0.2 R2: 0.04  
Z-Score:-4.283 P-Value:1.84E-5

HT12-ALS

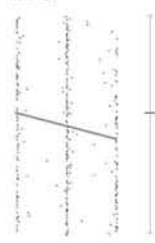

AA (95) AC (149) CC (80)  
Corr: -0.145 R2: 0.021  
Z-Score:-2.606 P-Value:0.009

HT12-UC

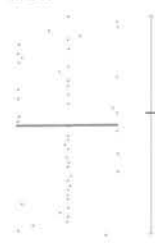

AA (11) AC (29) CC (9)  
Corr: 0.002 R2: 0  
Z-Score:0.016 P-Value:0.997

HBv2-Controls

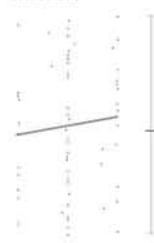

AA (11) AC (31) CC (17)  
Corr: 0.09 R2: 0.008  
Z-Score:0.676 P-Value:0.499

HBv2-ColicDisease

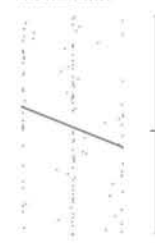

AA (30) AC (57) CC (24)  
Corr: -0.208 R2: 0.043  
Z-Score:-2.193 P-Value:0.028

HBv2-ALS

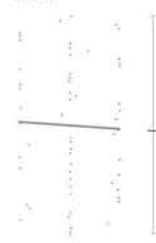

AA (14) AC (28) CC (17)  
Corr: -0.036 R2: 0.001  
Z-Score:-0.272 P-Value:0.785

SNP rs643381 (chr. 6, 139881116 bp)  
 Probe 2450647 (chr. 12, 51353787 - 51361458 bp), KR11  
 P-Value 3.03E-9

HT12-Controls

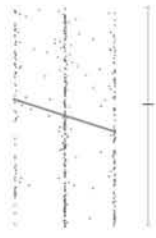

AA (82) AC (210) CC (110)  
 Corr: -0.166 R2: 0.028  
 Z-Score: 3.396 P-Value: 6.84E-4

HT12-COPD

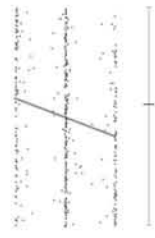

AA (110) AC (290) CC (101)  
 Corr: 0.2 R2: 0.04  
 Z-Score: 4.278 P-Value: 1.89E-5

HT12-ALS

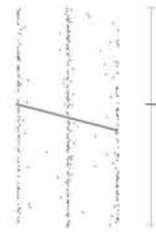

AA (95) AC (149) CC (80)  
 Corr: -0.145 R2: 0.021  
 Z-Score: 2.612 P-Value: 0.009

HT12-UC

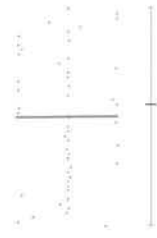

AA (11) AC (29) CC (9)  
 Corr: 0.001 R2: 0  
 Z-Score: 0.009 P-Value: 0.993

HBv2-Controls

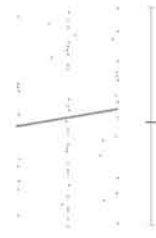

AA (11) AC (31) CC (17)  
 Corr: 0.089 R2: 0.008  
 Z-Score: 0.67 P-Value: 0.503

HBv2-ColiacDisease

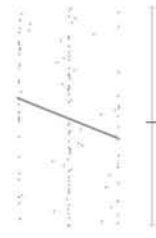

AA (30) AC (57) CC (24)  
 Corr: -0.208 R2: 0.043  
 Z-Score: 2.187 P-Value: 0.029

HBv2-ALS

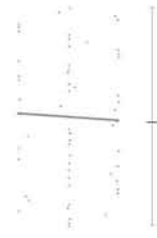

AA (14) AC (28) CC (17)  
 Corr: -0.036 R2: 0.001  
 Z-Score: 0.268 P-Value: 0.789

SNP rs628751 (chr. 6, 139881112 bp)  
 Probe 3170270 (chr. 1, 47420848 - 47430003 bp), PD2K1P1  
 P-Value 2.68E-9

HT12-Controls

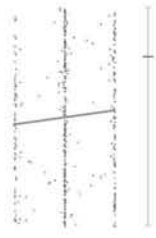

AA (82) AC (210) CC (110)  
 Corr: 0.071 R2: 0.005  
 Z-Score: 1.437 P-Value: 0.151

HT12-COPD

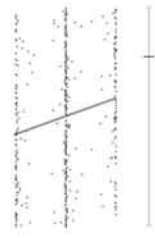

AA (110) AC (290) CC (101)  
 Corr: 0.19 R2: 0.036  
 Z-Score: 4.081 P-Value: 4.49E-5

HT12-ALS

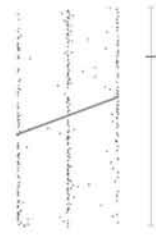

AA (95) AC (149) CC (80)  
 Corr: 0.21 R2: 0.044  
 Z-Score: 3.801 P-Value: 1.44E-4

HT12-UC

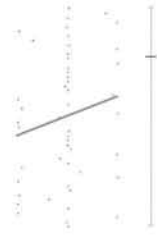

AA (11) AC (29) CC (9)  
 Corr: 0.186 R2: 0.035  
 Z-Score: 1.262 P-Value: 0.2

HBv2-Controls

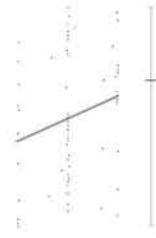

AA (11) AC (31) CC (17)  
 Corr: 0.23 R2: 0.053  
 Z-Score: 1.756 P-Value: 0.079

HBv2-ColiacDisease

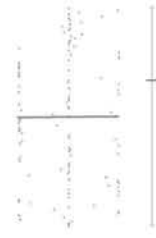

AA (30) AC (57) CC (24)  
 Corr: 0.009 R2: 0  
 Z-Score: 0.096 P-Value: 0.924

HBv2-ALS

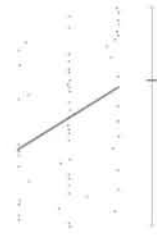

AA (14) AC (28) CC (17)  
 Corr: 0.332 R2: 0.11  
 Z-Score: 2.568 P-Value: 0.01

SNP rs292239 (chr. 12, 54768447 bp)  
 Probe 230484 (chr. 5, 177413996 - 177416873 bp), AC136632.3  
 P-Value 2.68E-9

HT12-Controls

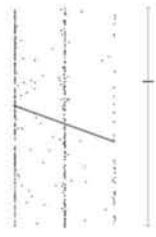

GG (196) GT (180) TT (38)  
 Corr: -0.178 R2: 0.031  
 Z-Score: 3.006 P-Value: 3.11E-4

HT12-COPD

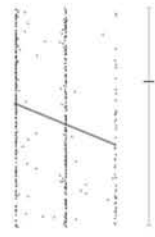

GG (198) GT (206) TT (88)  
 Corr: -0.213 R2: 0.045  
 Z-Score: 4.571 P-Value: 4.85E-6

HT12-ALS

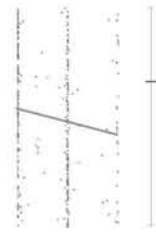

GG (144) GT (147) TT (33)  
 Corr: -0.134 R2: 0.018  
 Z-Score: 2.412 P-Value: 0.016

HT12-UC

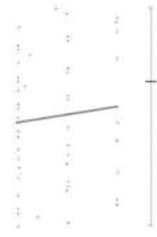

GG (22) GT (17) TT (9)  
 Corr: 0.094 R2: 0.009  
 Z-Score: 0.64 P-Value: 0.522

HBv2-Controls

eQTL not available  
 Probe not present.

HBv2-ColiacDisease

eQTL not available  
 Probe not present.

HBv2-ALS

eQTL not available  
 Probe not present.

SNP rs643381 (chr. 6, 139881116 bp)  
 Probe 3170270 (chr. 1, 47420848 - 47430003 bp), PD2K1P1  
 P-Value 2.68E-9

HT12-Controls

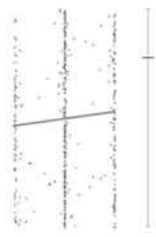

AA (82) AC (210) CC (110)  
 Corr: 0.071 R2: 0.005  
 Z-Score: 1.437 P-Value: 0.151

HT12-COPD

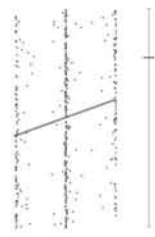

AA (110) AC (290) CC (101)  
 Corr: 0.191 R2: 0.036  
 Z-Score: 4.086 P-Value: 4.38E-5

HT12-ALS

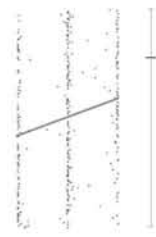

AA (95) AC (149) CC (80)  
 Corr: 0.21 R2: 0.044  
 Z-Score: 3.801 P-Value: 1.44E-4

HT12-UC

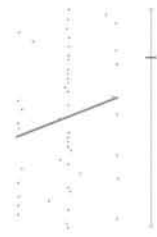

AA (11) AC (29) CC (9)  
 Corr: 0.186 R2: 0.035  
 Z-Score: 1.28 P-Value: 0.2

HBv2-Controls

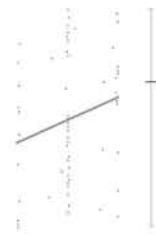

AA (11) AC (31) CC (17)  
 Corr: 0.23 R2: 0.053  
 Z-Score: 1.756 P-Value: 0.079

HBv2-ColiacDisease

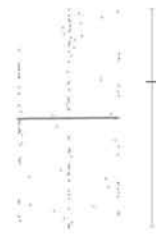

AA (30) AC (57) CC (24)  
 Corr: 0.009 R2: 0  
 Z-Score: 0.088 P-Value: 0.922

HBv2-ALS

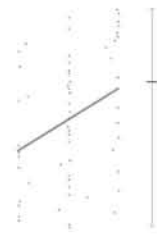

AA (14) AC (28) CC (17)  
 Corr: 0.332 R2: 0.11  
 Z-Score: 2.573 P-Value: 0.01

SNP rs8321 (chr. 6, 30140501 bp)  
 Probe 6300347 (chr. 22, 40340541 - 40390980 bp), XPC6  
 P-Value 2.32E-9

HT12-Controls

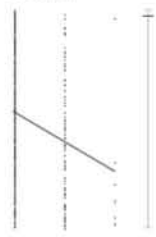

AA (316) AC (80) CC (8)  
 Corr: -0.224 R2: 0.05  
 Z-Score: 4.611 P-Value: 4E-6

HT12-COPD

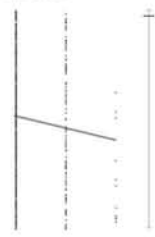

AA (341) AC (101) CC (11)  
 Corr: -0.092 R2: 0.008  
 Z-Score: 1.957 P-Value: 0.05

HT12-ALS

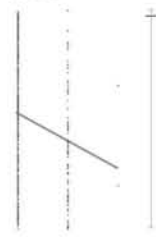

AA (268) AC (74) CC (2)  
 Corr: -0.196 R2: 0.038  
 Z-Score: 3.524 P-Value: 4.24E-4

HT12-UC

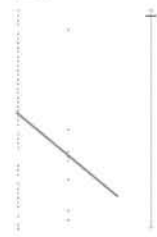

AA (41) AC (8) CC (0)  
 Corr: -0.238 R2: 0.057  
 Z-Score: 1.648 P-Value: 0.099

HBv2-Controls

eQTL not available  
 Probe not present.

HBv2-ColiacDisease

eQTL not available  
 Probe not present.

HBv2-ALS

eQTL not available  
 Probe not present.

SNP rs2517713 (chr. 6, 3006978 bp)  
 Probe 2970747 (chr. 6, 6839738 - 6844588 bp). AF203439.5/DEF11P/WAF238378.4/DEF43  
 P-Value 1.98E-9

HT12-Controls

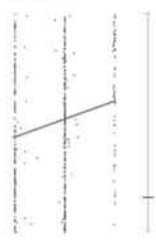

TT (150) TG (205) GG (58)  
 Corr: 0.189 R2: 0.036  
 Z-Score:3.868 P-Value:1.1E-4

HT12-COPD

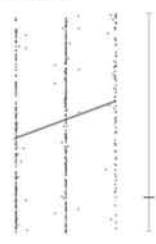

TT (102) TG (209) GG (82)  
 Corr: 0.204 R2: 0.042  
 Z-Score:4.363 P-Value:1.17E-5

HT12-ALS

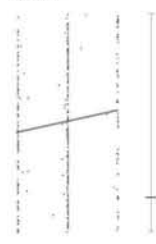

TT (98) TG (170) GG (56)  
 Corr: 0.118 R2: 0.014  
 Z-Score:2.125 P-Value:0.034

HT12-UC

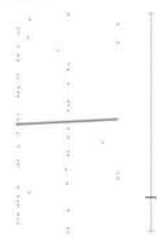

TT (27) TG (17) GG (5)  
 Corr: 0.025 R2: 0.001  
 Z-Score:0.17 P-Value:0.885

HBv2-Controls

eQTL not available  
 Probe not present.

HBv2-ColicDisease

eQTL not available  
 Probe not present.

HBv2-ALS

eQTL not available  
 Probe not present.

SNP rs11171739 (chr. 12, 5476692 bp)  
 Probe 5960296 (chr. 3, 191505197 - 19152909 bp). CLDN1  
 P-Value 2E-9

HT12-Controls

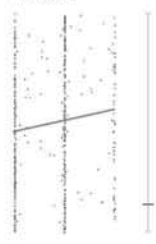

TT (158) TC (196) CC (60)  
 Corr: 0.114 R2: 0.013  
 Z-Score:2.327 P-Value:0.02

HT12-COPD

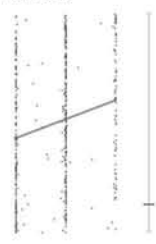

TT (153) TC (225) CC (75)  
 Corr: 0.203 R2: 0.041  
 Z-Score:4.357 P-Value:1.32E-5

HT12-ALS

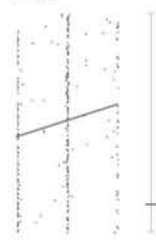

TT (102) TC (174) CC (48)  
 Corr: 0.196 R2: 0.028  
 Z-Score:3.001 P-Value:0.003

HT12-UC

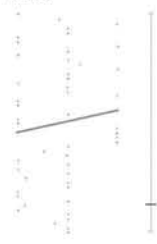

TT (18) TC (24) CC (9)  
 Corr: 0.115 R2: 0.013  
 Z-Score:0.788 P-Value:0.431

HBv2-Controls

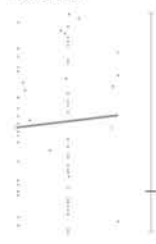

TT (22) TC (32) CC (5)  
 Corr: 0.055 R2: 0.003  
 Z-Score:0.413 P-Value:0.68

HBv2-ColicDisease

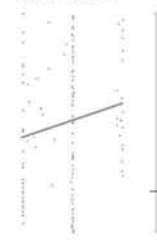

TT (33) TC (58) CC (19)  
 Corr: 0.175 R2: 0.031  
 Z-Score:1.839 P-Value:0.066

HBv2-ALS

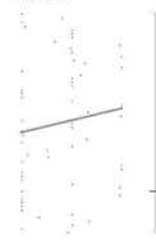

TT (24) TC (25) CC (10)  
 Corr: 0.138 R2: 0.019  
 Z-Score:1.041 P-Value:0.298

SNP rs11171739 (chr. 12, 5476692 bp)  
 Probe 2320494 (chr. 5, 177413996 - 177416873 bp). AC136632.3  
 P-Value 1.95E-9

HT12-Controls

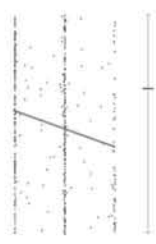

TT (158) TC (196) CC (60)  
 Corr: -0.194 R2: 0.038  
 Z-Score:-3.988 P-Value:7.25E-5

HT12-COPD

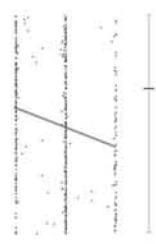

TT (153) TC (225) CC (75)  
 Corr: -0.209 R2: 0.043  
 Z-Score:-4.475 P-Value:7.65E-6

HT12-ALS

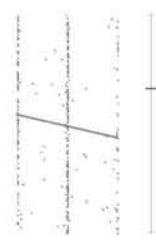

TT (102) TC (174) CC (48)  
 Corr: -0.114 R2: 0.013  
 Z-Score:-2.055 P-Value:0.04

HT12-UC

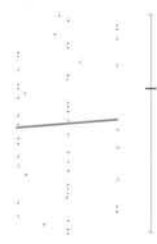

TT (18) TC (24) CC (9)  
 Corr: 0.039 R2: 0.002  
 Z-Score:0.268 P-Value:0.789

HBv2-Controls

eQTL not available  
 Probe not present.

HBv2-ColicDisease

eQTL not available  
 Probe not present.

HBv2-ALS

eQTL not available  
 Probe not present.

SNP rs12485738 (chr. 3, 56840816 bp)  
 Probe 2650114 (chr. 3, 125963488 - 126008834 bp). ITGB5  
 P-Value 1.89E-9

HT12-Controls

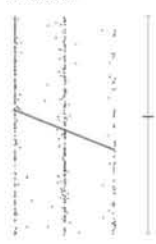

GG (153) GA (194) AA (67)  
 Corr: -0.22 R2: 0.048  
 Z-Score:-4.517 P-Value:6.27E-6

HT12-COPD

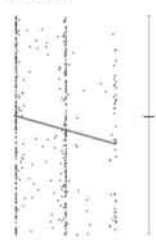

GG (202) GA (200) AA (51)  
 Corr: -0.141 R2: 0.02  
 Z-Score:-3.008 P-Value:0.003

HT12-ALS

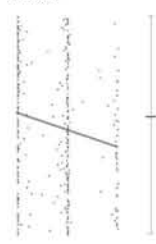

GG (132) GA (148) AA (44)  
 Corr: -0.176 R2: 0.031  
 Z-Score:-3.173 P-Value:0.002

HT12-UC

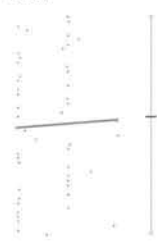

GG (24) GA (22) AA (7)  
 Corr: 0.035 R2: 0.001  
 Z-Score:0.239 P-Value:0.811

HBv2-Controls

eQTL not available  
 Probe not present.

HBv2-ColicDisease

eQTL not available  
 Probe not present.

HBv2-ALS

eQTL not available  
 Probe not present.

SNP rs1701704 (chr. 12, 54698754 bp)  
 Probe 2320494 (chr. 5, 177413996 - 177416873 bp). AC136632.3  
 P-Value 1.83E-9

HT12-Controls

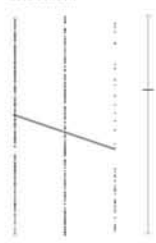

TT (193) TG (178) GG (43)  
 Corr: -0.18 R2: 0.032  
 Z-Score:-3.674 P-Value:2.39E-4

HT12-COPD

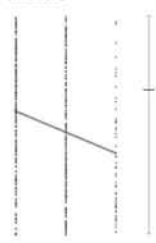

TT (196) TG (205) GG (51)  
 Corr: -0.218 R2: 0.048  
 Z-Score:-4.663 P-Value:2.83E-6

HT12-ALS

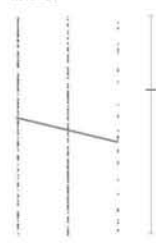

TT (145) TG (146) GG (33)  
 Corr: -0.125 R2: 0.016  
 Z-Score:-2.242 P-Value:0.025

HT12-UC

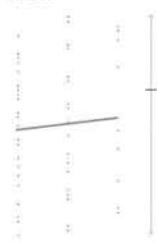

TT (22) TG (10) GG (9)  
 Corr: 0.071 R2: 0.005  
 Z-Score:0.486 P-Value:0.627

HBv2-Controls

eQTL not available  
 Probe not present.

HBv2-ColicDisease

eQTL not available  
 Probe not present.

HBv2-ALS

eQTL not available  
 Probe not present.

SNP rs4785763 (chr. 16, 88594437 bp)  
 Probe 4040541 (chr. 3, 113329247 - 113381589 bp), DRD3  
 P-Value 1.82E-9

HT12-Controls

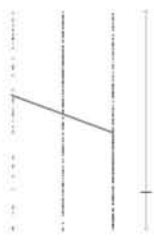

AA (42) AC (174) CC (198)  
 Corr: -0.195 R2: 0.036  
 Z-Score: -3.997 P-Value: 6.41E-5

HT12-COPD

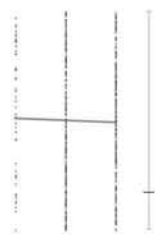

AA (45) AC (207) CC (201)  
 Corr: -0.017 R2: 0  
 Z-Score: -0.367 P-Value: 0.714

HT12-ALS

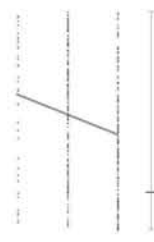

AA (35) AC (147) CC (142)  
 Corr: -0.211 R2: 0.044  
 Z-Score: -3.818 P-Value: 1.35E-4

HT12-UC

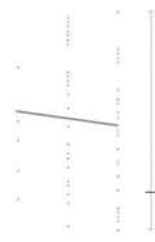

AA (5) AC (23) CC (21)  
 Corr: -0.071 R2: 0.005  
 Z-Score: -0.484 P-Value: 0.628

HBv2-Controls

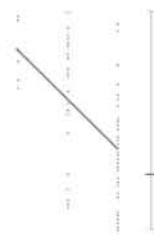

AA (6) AC (21) CC (33)  
 Corr: -0.521 R2: 0.271  
 Z-Score: -4.229 P-Value: 2.35E-5

HBv2-ColiacDisease

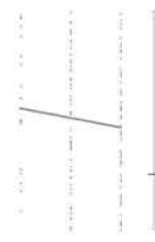

AA (16) AC (43) CC (52)  
 Corr: -0.109 R2: 0.012  
 Z-Score: -1.138 P-Value: 0.255

HBv2-ALS

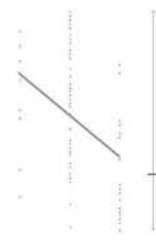

AA (8) AC (34) CC (17)  
 Corr: -0.41 R2: 0.169  
 Z-Score: -3.229 P-Value: 0.001

SNP rs12718597 (chr. 7, 50385922 bp)  
 Probe Human\_FlatSeq\_8\_v2.2340110 (chr. 2, 190709731 - 19077453 bp), AC010679.6  
 P-Value 1.74E-9

HT12-Controls

eQTL not available  
 Probe not present

HT12-COPD

eQTL not available  
 Probe not present

HT12-ALS

eQTL not available  
 Probe not present

HT12-UC

eQTL not available  
 Probe not present

HBv2-Controls

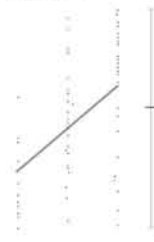

AA (11) AC (23) CC (25)  
 Corr: 0.496 R2: 0.246  
 Z-Score: 3.999 P-Value: 6.37E-5

HBv2-ColiacDisease

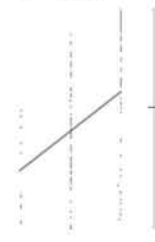

AA (11) AC (53) CC (47)  
 Corr: 0.397 R2: 0.158  
 Z-Score: 4.313 P-Value: 1.61E-5

HBv2-ALS

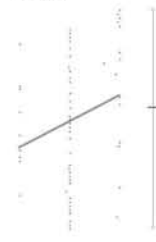

AA (9) AC (35) CC (15)  
 Corr: 0.255 R2: 0.065  
 Z-Score: 1.95 P-Value: 0.051

SNP rs2517713 (chr. 6, 30026078 bp)  
 Probe 3170403 (chr. 6, 11891735 - 11891901 bp), C6orf204  
 P-Value 1.68E-9

HT12-Controls

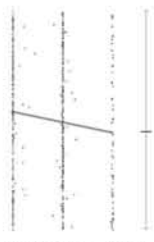

TT (150) TG (205) GG (59)  
 Corr: -0.109 R2: 0.012  
 Z-Score: -2.218 P-Value: 0.027

HT12-COPD

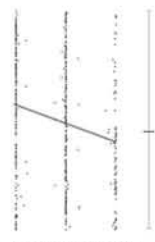

TT (162) TG (209) GG (82)  
 Corr: -0.206 R2: 0.042  
 Z-Score: -4.42 P-Value: 9.68E-6

HT12-ALS

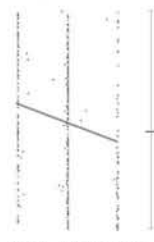

TT (96) TG (170) GG (56)  
 Corr: -0.207 R2: 0.043  
 Z-Score: -3.744 P-Value: 1.81E-4

HT12-UC

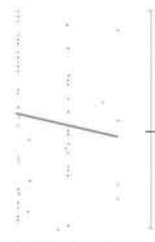

TT (27) TG (17) GG (5)  
 Corr: -0.114 R2: 0.013  
 Z-Score: -0.777 P-Value: 0.437

HBv2-Controls

eQTL not available  
 Probe not present

HBv2-ColiacDisease

eQTL not available  
 Probe not present

HBv2-ALS

eQTL not available  
 Probe not present

SNP rs12485738 (chr. 3, 56840816 bp)  
 Probe 690184 (chr. 12, 10030319 - 10051641 bp), CLEC1B/CLEC12B  
 P-Value 1.6E-9

HT12-Controls

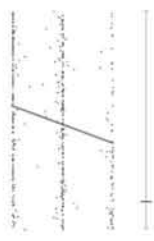

GG (153) GA (194) AA (67)  
 Corr: -0.204 R2: 0.042  
 Z-Score: -4.19 P-Value: 2.79E-5

HT12-COPD

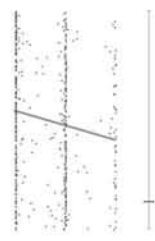

GG (202) GA (205) AA (51)  
 Corr: -0.152 R2: 0.023  
 Z-Score: -3.244 P-Value: 0.001

HT12-ALS

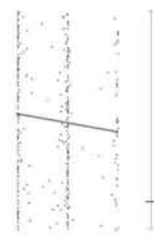

GG (132) GA (148) AA (44)  
 Corr: -0.095 R2: 0.009  
 Z-Score: -1.71 P-Value: 0.087

HT12-UC

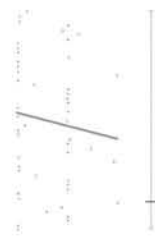

GG (24) GA (22) AA (3)  
 Corr: -0.121 R2: 0.015  
 Z-Score: -0.826 P-Value: 0.409

HBv2-Controls

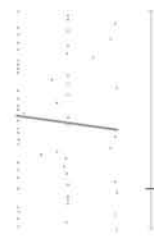

GG (26) GA (21) AA (10)  
 Corr: -0.079 R2: 0.006  
 Z-Score: -0.596 P-Value: 0.551

HBv2-ColiacDisease

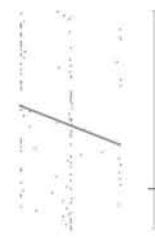

GG (41) GA (57) AA (13)  
 Corr: -0.189 R2: 0.036  
 Z-Score: -1.986 P-Value: 0.047

HBv2-ALS

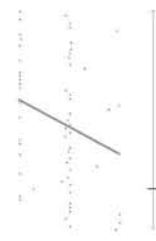

GG (20) GA (32) AA (7)  
 Corr: -0.257 R2: 0.066  
 Z-Score: -1.967 P-Value: 0.049

SNP rs12485738 (chr. 3, 56840816 bp)  
 Probe 690022 (chr. 22, 18065526 - 18069297 bp), SEPT5/WP18B  
 P-Value 1.47E-9

HT12-Controls

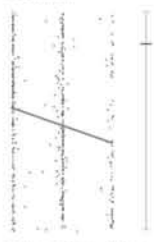

GG (153) GA (194) AA (67)  
 Corr: -0.19 R2: 0.036  
 Z-Score: -3.898 P-Value: 9.68E-5

HT12-COPD

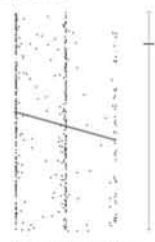

GG (202) GA (205) AA (51)  
 Corr: -0.142 R2: 0.02  
 Z-Score: -3.03 P-Value: 0.002

HT12-ALS

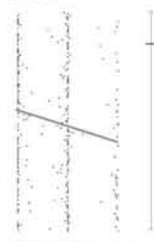

GG (132) GA (148) AA (44)  
 Corr: -0.164 R2: 0.027  
 Z-Score: -2.959 P-Value: 0.003

HT12-UC

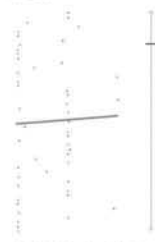

GG (24) GA (22) AA (3)  
 Corr: 0.038 R2: 0.001  
 Z-Score: 0.256 P-Value: 0.796

HBv2-Controls

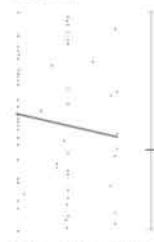

GG (26) GA (21) AA (10)  
 Corr: -0.128 R2: 0.018  
 Z-Score: -0.966 P-Value: 0.334

HBv2-ColiacDisease

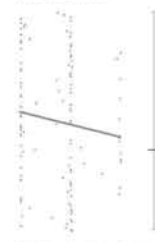

GG (41) GA (57) AA (13)  
 Corr: -0.121 R2: 0.015  
 Z-Score: -1.263 P-Value: 0.207

HBv2-ALS

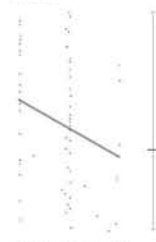

GG (20) GA (32) AA (7)  
 Corr: -0.271 R2: 0.073  
 Z-Score: -2.072 P-Value: 0.038



SNP rs2517713 (chr. 6, 3006078 bp)  
Probe 665035 (chr. 12, 8862814 tel.)  
P-Value 1.44E-9

HT12-Controls

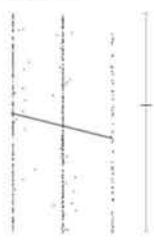

TT (150) TG (205) GG (59)  
Corr: -0.132 R2: 0.017  
Z-Score: 2.69 P-Value: 0.007

HT12-COPD

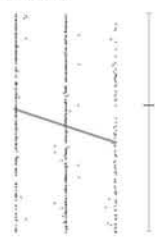

TT (162) TG (209) GG (82)  
Corr: -0.187 R2: 0.035  
Z-Score: 4.004 P-Value: 6.29E-5

HT12-ALS

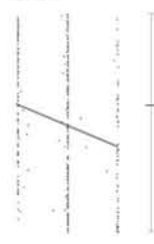

TT (96) TG (170) GG (56)  
Corr: -0.222 R2: 0.049  
Z-Score: 4.027 P-Value: 6.66E-5

HT12-UC

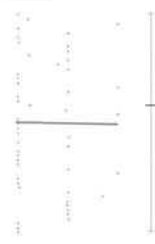

TT (27) TG (17) GG (5)  
Corr: -0.012 R2: 0  
Z-Score: 0.081 P-Value: 0.935

HBv2-Controls

eQTL not available  
Probe not present.

HBv2-ColicDisease

eQTL not available  
Probe not present.

HBv2-ALS

eQTL not available  
Probe not present.

SNP rs2523383 (chr. 6, 29813638 bp)  
Probe 7150170 (chr. 8, 6840527 - 6844510 bp), AJ233439.5/WDEF1P/WAF238378.4/DEF43  
P-Value 1.2E-9

HT12-Controls

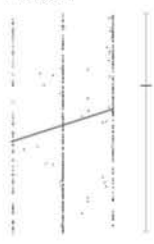

GG (72) GA (190) AA (140)  
Corr: 0.175 R2: 0.03  
Z-Score: 3.57 P-Value: 3.58E-4

HT12-COPD

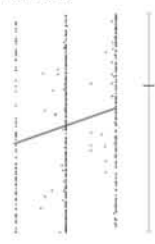

GG (75) GA (221) AA (157)  
Corr: 0.194 R2: 0.038  
Z-Score: 4.16 P-Value: 3.19E-5

HT12-ALS

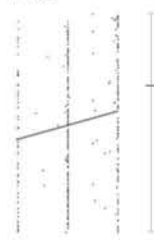

GG (53) GA (158) AA (113)  
Corr: 0.15 R2: 0.022  
Z-Score: 2.698 P-Value: 0.007

HT12-UC

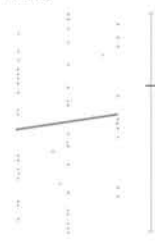

GG (18) GA (20) AA (11)  
Corr: 0.087 R2: 0.008  
Z-Score: 0.593 P-Value: 0.553

HBv2-Controls

eQTL not available  
Probe not present.

HBv2-ColicDisease

eQTL not available  
Probe not present.

HBv2-ALS

eQTL not available  
Probe not present.

SNP rs11171739 (chr. 12, 54756892 bp)  
Probe 6060630 (chr. 17, 3853296 - 3859167 bp), KR119  
P-Value 1.13E-9

HT12-Controls

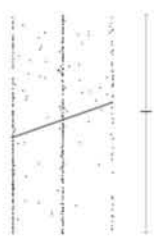

TT (158) TC (196) CC (62)  
Corr: 0.185 R2: 0.034  
Z-Score: 3.795 P-Value: 1.47E-4

HT12-COPD

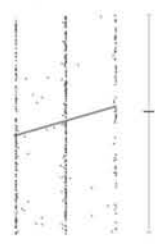

TT (153) TC (225) CC (75)  
Corr: 0.155 R2: 0.024  
Z-Score: 3.313 P-Value: 9.21E-4

HT12-ALS

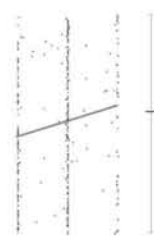

TT (102) TC (174) CC (48)  
Corr: 0.18 R2: 0.026  
Z-Score: 2.864 P-Value: 0.004

HT12-UC

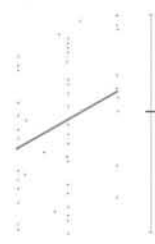

TT (18) TC (24) CC (9)  
Corr: 0.307 R2: 0.094  
Z-Score: 2.144 P-Value: 0.032

HBv2-Controls

eQTL not available  
Probe not present.

HBv2-ColicDisease

eQTL not available  
Probe not present.

HBv2-ALS

eQTL not available  
Probe not present.

SNP rs12485738 (chr. 3, 56840816 bp)  
Probe 7550343 (chr. 1, 171712109 - 171725569 bp), PRDX6  
P-Value 8.29E-10

HT12-Controls

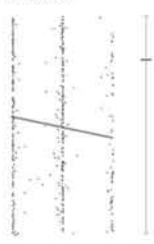

GG (153) GA (194) AA (67)  
Corr: -0.115 R2: 0.013  
Z-Score: 2.333 P-Value: 0.02

HT12-COPD

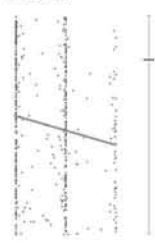

GG (202) GA (205) AA (51)  
Corr: -0.147 R2: 0.022  
Z-Score: 3.144 P-Value: 0.002

HT12-ALS

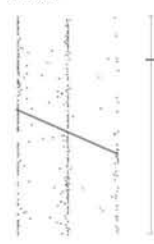

GG (132) GA (148) AA (44)  
Corr: -0.228 R2: 0.052  
Z-Score: 4.14 P-Value: 3.48E-5

HT12-UC

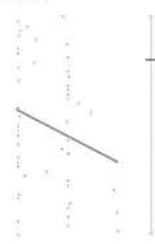

GG (24) GA (22) AA (7)  
Corr: -0.239 R2: 0.057  
Z-Score: 1.653 P-Value: 0.098

HBv2-Controls

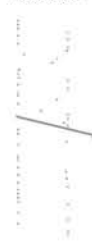

GG (28) GA (21) AA (10)  
Corr: -0.132 R2: 0.018  
Z-Score: 1 P-Value: 0.317

HBv2-ColicDisease

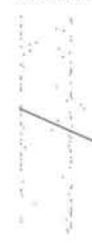

GG (41) GA (57) AA (13)  
Corr: -0.217 R2: 0.047  
Z-Score: 2.288 P-Value: 0.022

HBv2-ALS

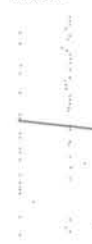

GG (20) GA (32) AA (7)  
Corr: -0.052 R2: 0.003  
Z-Score: 0.391 P-Value: 0.696

SNP rs12718587 (chr. 7, 53255922 bp)  
Probe 1450068 (chr. 11, 60781534 - 6060394 bp), VWCE  
P-Value 7.62E-10

HT12-Controls

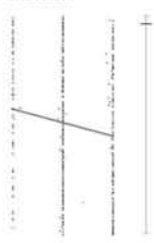

AA (94) AC (197) CC (153)  
Corr: -0.145 R2: 0.021  
Z-Score: 2.952 P-Value: 0.003

HT12-COPD

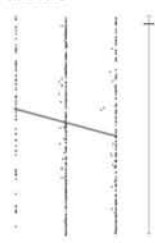

AA (88) AC (226) CC (159)  
Corr: -0.144 R2: 0.021  
Z-Score: 3.068 P-Value: 0.002

HT12-ALS

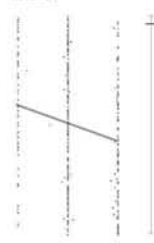

AA (56) AC (103) CC (105)  
Corr: -0.196 R2: 0.039  
Z-Score: 3.554 P-Value: 3.79E-4

HT12-UC

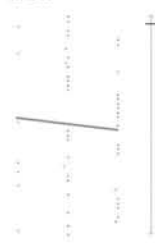

AA (7) AC (23) CC (19)  
Corr: -0.06 R2: 0.004  
Z-Score: 0.412 P-Value: 0.681

HBv2-Controls

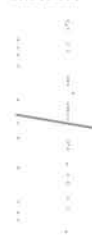

AA (11) AC (25) CC (25)  
Corr: -0.102 R2: 0.01  
Z-Score: 0.77 P-Value: 0.441

HBv2-ColicDisease

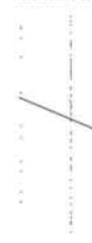

AA (11) AC (53) CC (47)  
Corr: -0.211 R2: 0.044  
Z-Score: 2.22 P-Value: 0.026

HBv2-ALS

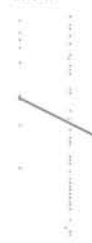

AA (9) AC (35) CC (15)  
Corr: -0.242 R2: 0.058  
Z-Score: 1.845 P-Value: 0.065

SNP rs3131379 (chr. 6, 31829012 bp)  
Probe 1110300 (chr. 4, 153765727 - 153821641 bp), TMEM154  
P-Value: 6.79E-10

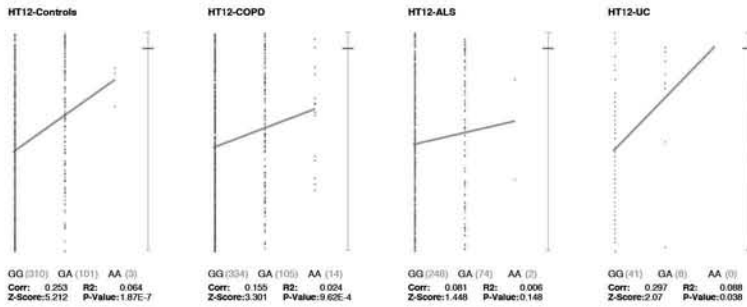

HBv2-Controls  
eQTL not available  
Probe not present.

HBv2-ColicDisease  
eQTL not available  
Probe not present.

HBv2-ALS  
eQTL not available  
Probe not present.

SNP rs3117282 (chr. 6, 31728499 bp)  
Probe 1110300 (chr. 4, 153765727 - 153821641 bp), TMEM154  
P-Value: 4.89E-10

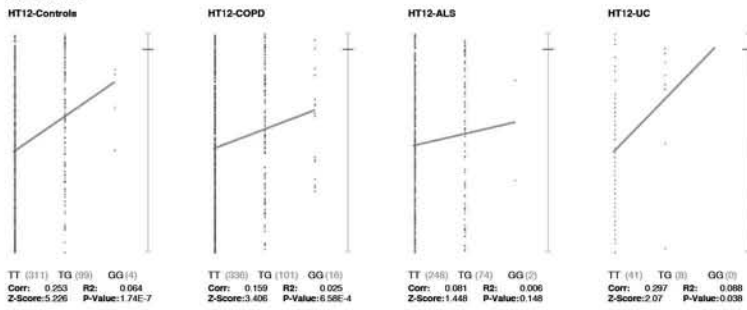

HBv2-Controls  
eQTL not available  
Probe not present.

HBv2-ColicDisease  
eQTL not available  
Probe not present.

HBv2-ALS  
eQTL not available  
Probe not present.

SNP rs12485738 (chr. 3, 56840616 bp)  
Probe 6260747 (chr. 11, 124117765 - 124125826 bp), NFGN/VSIG2  
P-Value: 4.85E-10

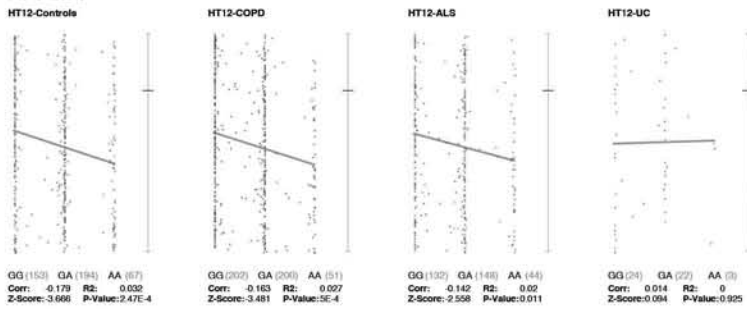

SNP rs6457620 (chr. 6, 32771977 bp)  
Probe 2940424 (chr. 7, 36518135 - 36731595 bp), AOH1  
P-Value: 3.84E-10

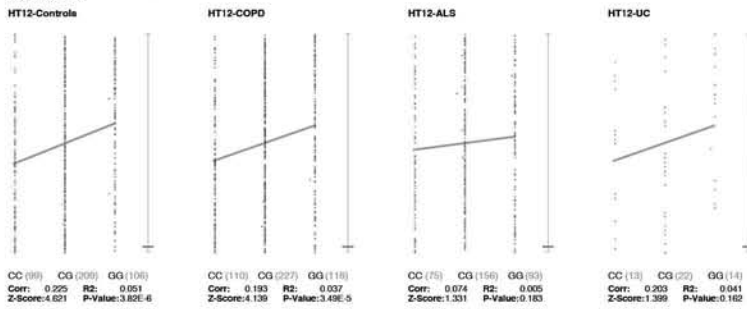

SNP rs12718587 (chr. 7, 53325922 bp)  
Probe 6270373 (chr. 6, 13896000 - 13923788 bp), CCDC90A  
P-Value: 3.33E-10

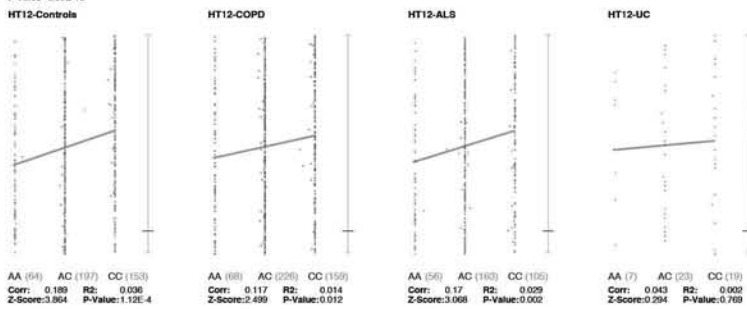

SNP rs6457617 (chr. 6, 32771829 bp)  
 Probe 2940424 (chr. 7, 36518135 - 36731595 bp), AOH1  
 P-Value 3.02E-10

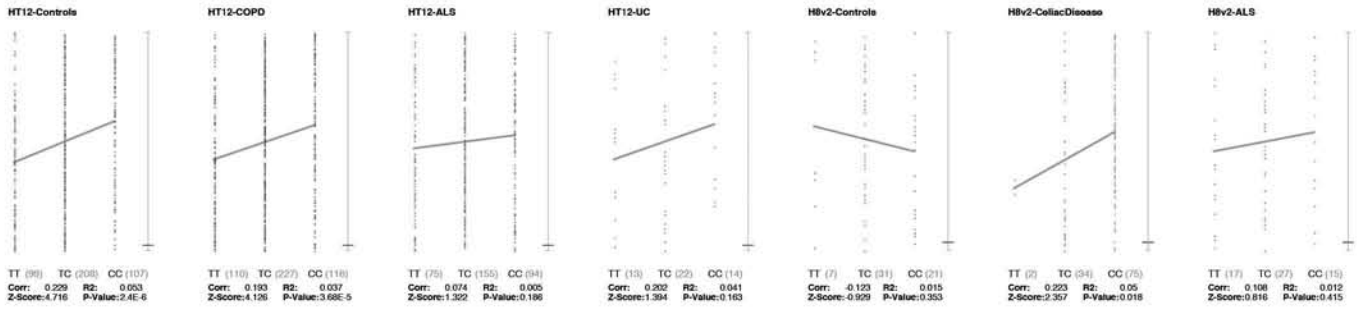

SNP rs2517713 (chr. 6, 30092078 bp)  
 Probe 5609500 (chr. 13, 76352630 - 76359081 bp), KC1D12  
 P-Value 2.74E-10

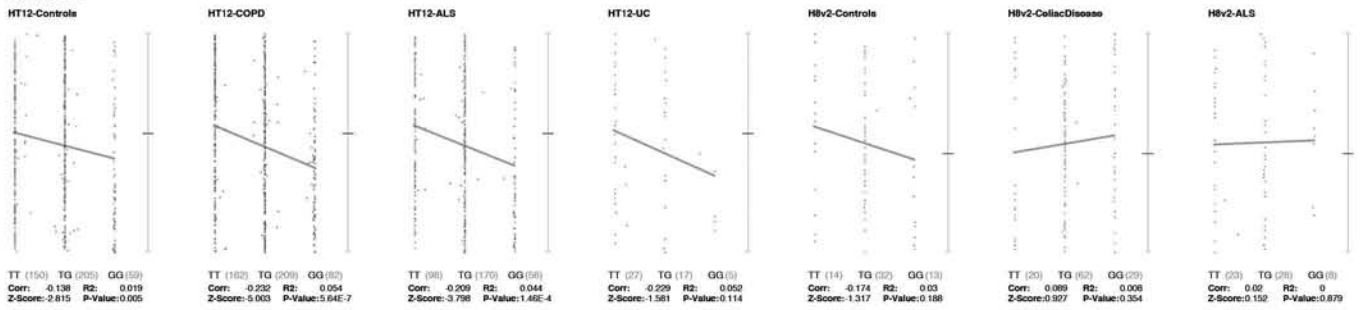

SNP rs628751 (chr. 6, 13688112 bp)  
 Probe 5270146 (chr. 14, 68923614 - 68923614 bp), -  
 P-Value 1.94E-10

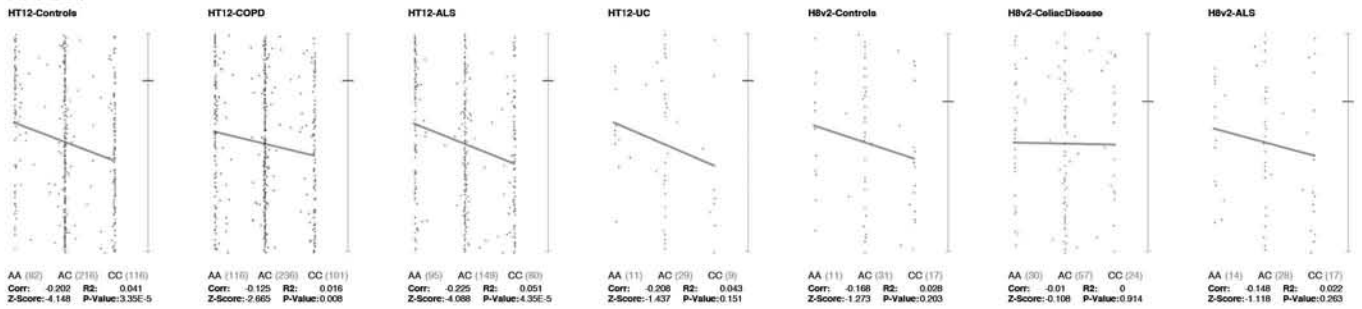

SNP rs12485738 (chr. 3, 56840816 bp)  
 Probe 1050006 (chr. 4, 91018706 - 91059803 bp), MMR1  
 P-Value 1.95E-10

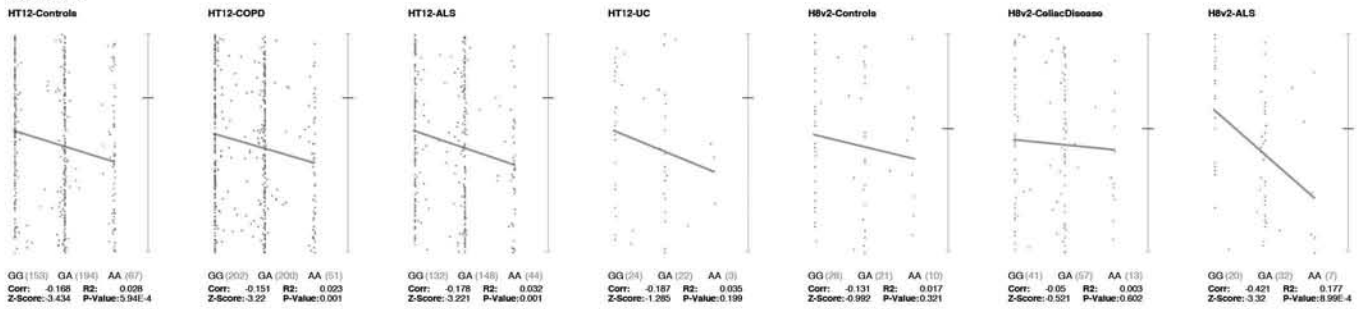

SNP rs643381 (chr. 6, 13688116 bp)  
 Probe 3270146 (chr. 14, 68923614 - 68923614 bp), -  
 P-Value 1.77E-10

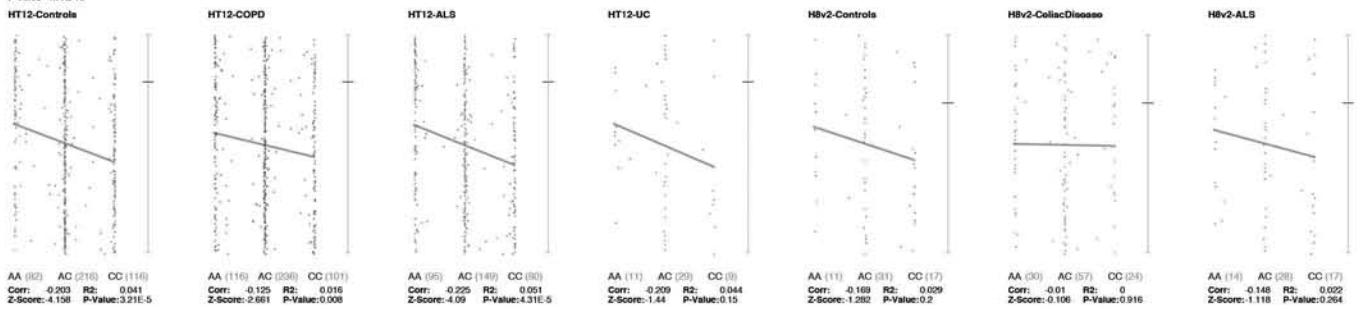

SNP rs9264942 (chr. 6, 31382359 bp)  
Probe 4250458 (chr. 11, 65377864 - 65383360 bp), CFL1  
P-Value 1.23E-10

HT12-Controls

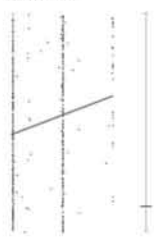

TT (201) TC (197) CC (26)  
Corr: 0.181 R2: 0.033  
Z-Score:3.703 P-Value:2.13E-4

HT12-COPD

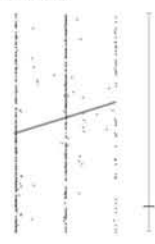

TT (202) TC (202) CC (49)  
Corr: 0.164 R2: 0.027  
Z-Score:3.515 P-Value:4.39E-4

HT12-ALS

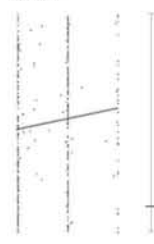

TT (148) TC (145) CC (31)  
Corr: 0.105 R2: 0.011  
Z-Score:1.887 P-Value:0.059

HT12-UC

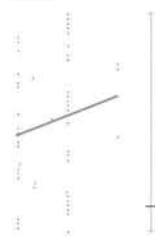

TT (21) TC (25) CC (3)  
Corr: 0.175 R2: 0.03  
Z-Score:1.2 P-Value:0.23

HBv2-Controls

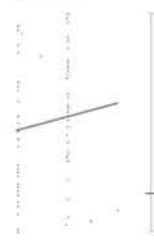

TT (78) TC (30) CC (1)  
Corr: 0.113 R2: 0.013  
Z-Score:0.852 P-Value:0.394

HBv2-ColiacDisease

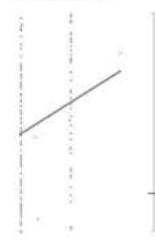

TT (71) TC (38) CC (1)  
Corr: 0.25 R2: 0.062  
Z-Score:2.648 P-Value:0.008

HBv2-ALS

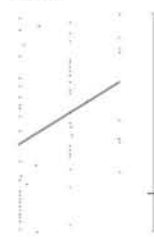

TT (28) TC (20) CC (6)  
Corr: 0.335 R2: 0.112  
Z-Score:2.584 P-Value:0.009

SNP rs227139 (chr. 6, 32521437 bp)  
Probe 1110300 (chr. 4, 153765727 - 153821641 bp), TMEM154  
P-Value 1.06E-10

HT12-Controls

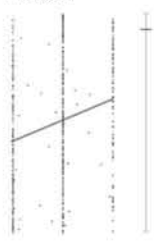

AA (133) AG (196) GG (85)  
Corr: 0.234 R2: 0.055  
Z-Score:4.808 P-Value:1.53E-6

HT12-COPD

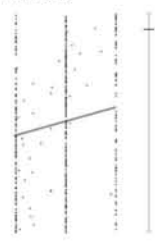

AA (145) AG (217) GG (91)  
Corr: 0.16 R2: 0.025  
Z-Score:3.41 P-Value:6.5E-4

HT12-ALS

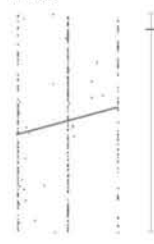

AA (106) AG (154) GG (64)  
Corr: 0.149 R2: 0.022  
Z-Score:2.683 P-Value:0.007

HT12-UC

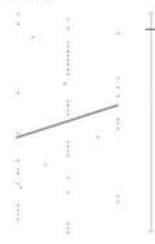

AA (14) AG (25) GG (10)  
Corr: 0.174 R2: 0.03  
Z-Score:1.192 P-Value:0.233

HBv2-Controls

eQTL not available  
Probe not present.

HBv2-ColiacDisease

eQTL not available  
Probe not present.

HBv2-ALS

eQTL not available  
Probe not present.

SNP rs12485738 (chr. 3, 56842616 bp)  
Probe 5900682 (chr. 15, 62818150 - 62855839 bp), RFPMS2  
P-Value 8.81E-11

HT12-Controls

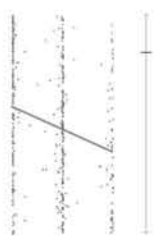

GG (153) GA (194) AA (67)  
Corr: -0.241 R2: 0.058  
Z-Score:-4.993 P-Value:6.96E-7

HT12-COPD

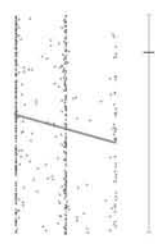

GG (202) GA (205) AA (51)  
Corr: -0.143 R2: 0.021  
Z-Score:-3.056 P-Value:0.002

HT12-ALS

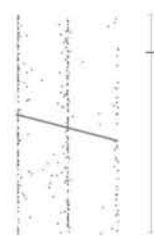

GG (132) GA (148) AA (44)  
Corr: -0.136 R2: 0.019  
Z-Score:-2.455 P-Value:0.014

HT12-UC

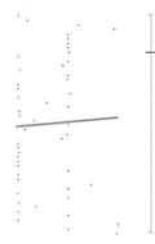

GG (24) GA (22) AA (3)  
Corr: 0.045 R2: 0.002  
Z-Score:0.306 P-Value:0.759

HBv2-Controls

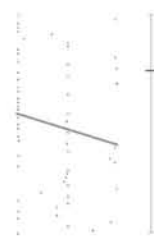

GG (28) GA (21) AA (10)  
Corr: -0.17 R2: 0.029  
Z-Score:-1.29 P-Value:0.197

HBv2-ColiacDisease

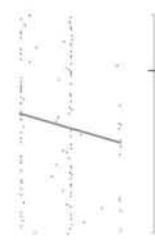

GG (41) GA (57) AA (13)  
Corr: -0.144 R2: 0.021  
Z-Score:-1.512 P-Value:0.131

HBv2-ALS

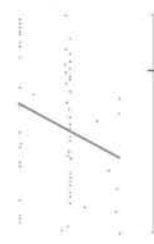

GG (20) GA (22) AA (7)  
Corr: 0.255 R2: 0.065  
Z-Score:-1.953 P-Value:0.051

SNP rs12485738 (chr. 3, 56842616 bp)  
Probe 630470 (chr. 19, 43405644 - 43468486 bp), C19orf33  
P-Value 8.14E-11

HT12-Controls

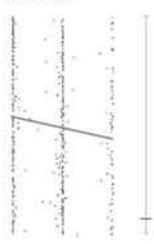

GG (153) GA (194) AA (67)  
Corr: -0.12 R2: 0.014  
Z-Score:-2.451 P-Value:0.014

HT12-COPD

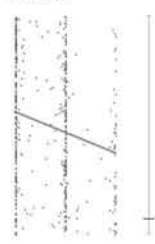

GG (202) GA (205) AA (51)  
Corr: -0.211 R2: 0.045  
Z-Score:-4.531 P-Value:5.87E-6

HT12-ALS

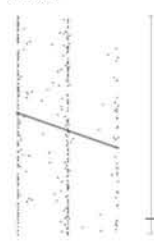

GG (132) GA (148) AA (44)  
Corr: -0.185 R2: 0.034  
Z-Score:-3.348 P-Value:8.12E-4

HT12-UC

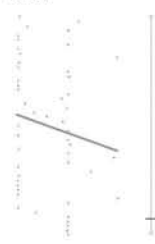

GG (24) GA (22) AA (3)  
Corr: -0.17 R2: 0.029  
Z-Score:-1.166 P-Value:0.243

HBv2-Controls

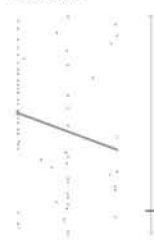

GG (28) GA (21) AA (10)  
Corr: -0.206 R2: 0.042  
Z-Score:-1.566 P-Value:0.117

HBv2-ColiacDisease

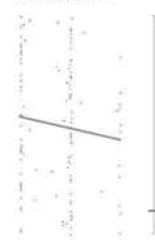

GG (41) GA (57) AA (13)  
Corr: -0.112 R2: 0.013  
Z-Score:-1.17 P-Value:0.242

HBv2-ALS

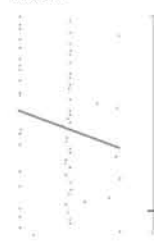

GG (20) GA (22) AA (7)  
Corr: -0.175 R2: 0.031  
Z-Score:-1.328 P-Value:0.184

SNP rs259919 (chr. 6, 30133452 bp)  
Probe 5060577 (chr. 20, 61958531 - 61994332 bp), TP05212  
P-Value 7.92E-11

HT12-Controls

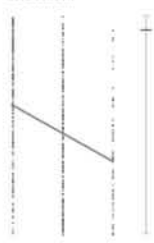

GG (168) GA (192) AA (55)  
Corr: -0.301 R2: 0.091  
Z-Score:6.248 P-Value:4.14E-10

HT12-COPD

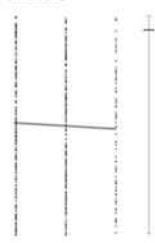

GG (189) GA (192) AA (72)  
Corr: -0.031 R2: 0.001  
Z-Score:0.663 P-Value:0.507

HT12-ALS

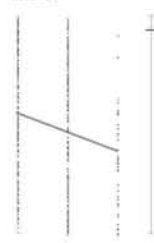

GG (145) GA (143) AA (38)  
Corr: -0.198 R2: 0.039  
Z-Score:-3.564 P-Value:3.39E-4

HT12-UC

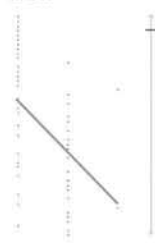

GG (27) GA (20) AA (2)  
Corr: -0.459 R2: 0.21  
Z-Score:3.314 P-Value:9.18E-4

HBv2-Controls

eQTL not available  
Probe not present.

HBv2-ColiacDisease

eQTL not available  
Probe not present.

HBv2-ALS

eQTL not available  
Probe not present.

SNP rs1245738 (chr. 3, 56840616 bp)  
Probe IS30474 (chr. 11, 825298 - 831691 bp), CD151@POLR2L  
P-Value: 7.53E-11

HT12-Controls

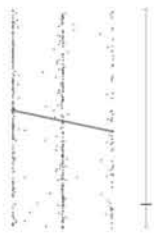

GG (153) GA (194) AA (67)  
Corr: -0.115 R2: 0.013  
Z-Score: 2.34 P-Value: 5.01E-4

HT12-COPD

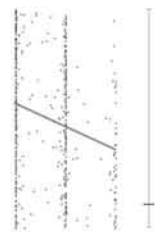

GG (202) GA (200) AA (51)  
Corr: -0.234 R2: 0.055  
Z-Score: 5.044 P-Value: 4.59E-7

HT12-ALS

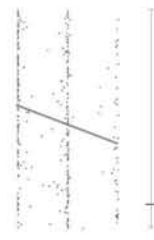

GG (132) GA (148) AA (44)  
Corr: 0.2 R2: 0.04  
Z-Score: 3.626 P-Value: 2.88E-4

HT12-UC

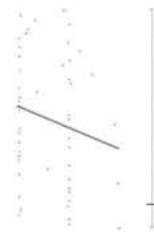

GG (24) GA (22) AA (3)  
Corr: 0.191 R2: 0.036  
Z-Score: 1.314 P-Value: 0.189

HBv2-Controls

eQTL not available  
Probe not present.

HBv2-ColicDisease

eQTL not available  
Probe not present.

HBv2-ALS

eQTL not available  
Probe not present.

SNP rs9272346 (chr. 6, 32712350 bp)  
Probe 2940424 (chr. 7, 36518135 - 36731995 bp), AOH1  
P-Value: 5.09E-11

HT12-Controls

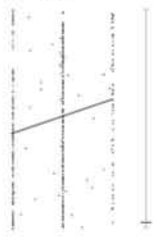

AA (130) AG (214) GG (70)  
Corr: 0.182 R2: 0.033  
Z-Score: 3.727 P-Value: 1.94E-4

HT12-COPD

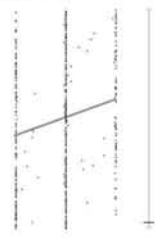

AA (134) AG (235) GG (84)  
Corr: 0.193 R2: 0.037  
Z-Score: 4.133 P-Value: 3.58E-5

HT12-ALS

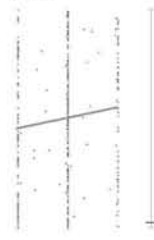

AA (97) AG (165) GG (62)  
Corr: 0.111 R2: 0.012  
Z-Score: 1.996 P-Value: 0.046

HT12-UC

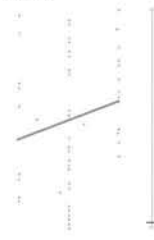

AA (10) AG (20) GG (13)  
Corr: 0.2 R2: 0.04  
Z-Score: 1.376 P-Value: 0.169

HBv2-Controls

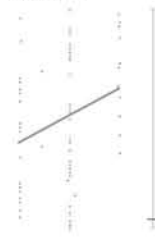

AA (20) AG (20) GG (11)  
Corr: 0.288 R2: 0.083  
Z-Score: 2.216 P-Value: 0.027

HBv2-ColicDisease

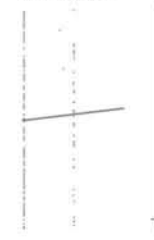

AA (79) AG (32) GG (2)  
Corr: 0.042 R2: 0.002  
Z-Score: 0.434 P-Value: 0.664

HBv2-ALS

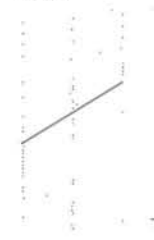

AA (24) AG (23) GG (12)  
Corr: 0.349 R2: 0.122  
Z-Score: 2.706 P-Value: 0.007

SNP rs2523363 (chr. 6, 29613638 bp)  
Probe 5060500 (chr. 13, 76326200 - 76390061 bp), KC1D12  
P-Value: 4.7E-11

HT12-Controls

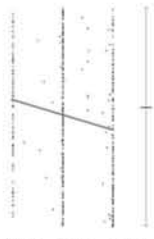

GG (72) GA (196) AA (148)  
Corr: -0.184 R2: 0.027  
Z-Score: 3.351 P-Value: 8.04E-4

HT12-COPD

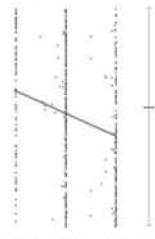

GG (75) GA (221) AA (157)  
Corr: -0.246 R2: 0.061  
Z-Score: 5.311 P-Value: 1.09E-7

HT12-ALS

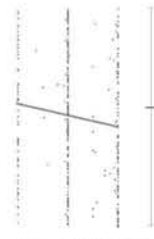

GG (50) GA (158) AA (113)  
Corr: -0.129 R2: 0.015  
Z-Score: 2.222 P-Value: 0.026

HT12-UC

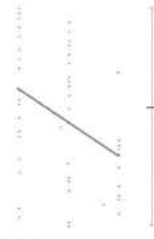

GG (18) GA (20) AA (11)  
Corr: -0.388 R2: 0.15  
Z-Score: 2.754 P-Value: 0.006

HBv2-Controls

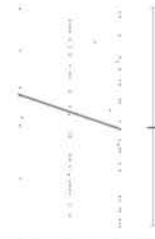

GG (7) GA (25) AA (27)  
Corr: -0.177 R2: 0.031  
Z-Score: 1.343 P-Value: 0.179

HBv2-ColicDisease

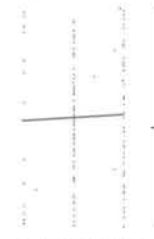

GG (14) GA (54) AA (43)  
Corr: 0.031 R2: 0.001  
Z-Score: 0.321 P-Value: 0.748

HBv2-ALS

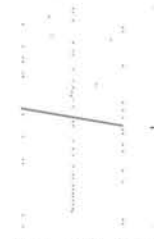

GG (12) GA (32) AA (15)  
Corr: 0.089 R2: 0.008  
Z-Score: 0.607 P-Value: 0.505

SNP rs9268645 (chr. 6, 32516505 bp)  
Probe 2940424 (chr. 7, 36518135 - 36731995 bp), AOH1  
P-Value: 5.13E-11

HT12-Controls

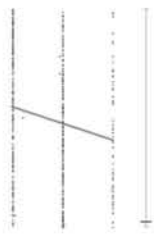

CC (172) CG (187) GG (55)  
Corr: -0.178 R2: 0.032  
Z-Score: 3.648 P-Value: 2.67E-4

HT12-COPD

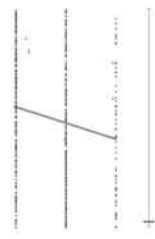

CC (194) CG (117) GG (62)  
Corr: -0.176 R2: 0.031  
Z-Score: 3.768 P-Value: 1.65E-4

HT12-ALS

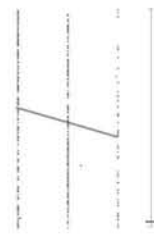

CC (159) CG (140) GG (45)  
Corr: -0.161 R2: 0.026  
Z-Score: 2.911 P-Value: 0.004

HT12-UC

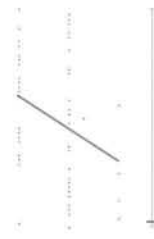

CC (20) CG (25) GG (4)  
Corr: -0.315 R2: 0.099  
Z-Score: 2.202 P-Value: 0.028

HBv2-Controls

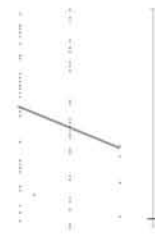

CC (29) CG (25) GG (4)  
Corr: -0.197 R2: 0.039  
Z-Score: 1.499 P-Value: 0.134

HBv2-ColicDisease

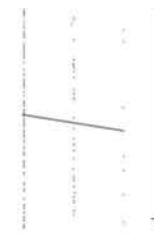

CC (73) CG (31) GG (7)  
Corr: -0.076 R2: 0.006  
Z-Score: 0.792 P-Value: 0.428

HBv2-ALS

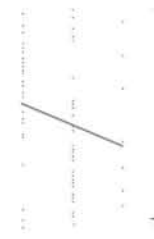

CC (24) CG (28) GG (7)  
Corr: -0.218 R2: 0.048  
Z-Score: 1.66 P-Value: 0.097

SNP rs1313179 (chr. 6, 31820012 bp)  
Probe 6390347 (chr. 22, 40340241 - 40390980 bp), KPC6  
P-Value: 2.72E-11

HT12-Controls

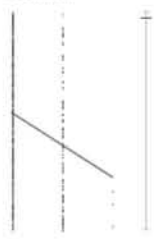

GG (210) GA (101) AA (8)  
Corr: -0.231 R2: 0.053  
Z-Score: 4.754 P-Value: 1.99E-6

HT12-COPD

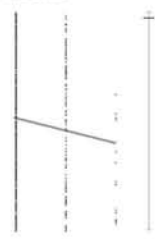

GG (234) GA (105) AA (14)  
Corr: -0.104 R2: 0.011  
Z-Score: 2.214 P-Value: 0.027

HT12-ALS

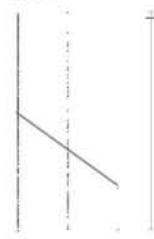

GG (248) GA (74) AA (2)  
Corr: 0.251 R2: 0.063  
Z-Score: 4.577 P-Value: 4.72E-6

HT12-UC

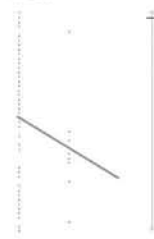

GG (41) GA (8) AA (8)  
Corr: -0.176 R2: 0.031  
Z-Score: 1.208 P-Value: 0.227

HBv2-Controls

eQTL not available  
Probe not present.

HBv2-ColicDisease

eQTL not available  
Probe not present.

HBv2-ALS

eQTL not available  
Probe not present.

SNP rs9264942 (chr. 6, 31382359 bp)  
Probe 1110300 (chr. 4, 153765727 - 153821641 bp), TMEM154  
P-Value 2.59E-11

HT12-Controls

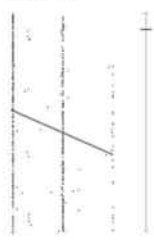

TT (201) TC (197) CC (26)  
Corr: -0.209 R2: 0.044  
Z-Score: -4.293 P-Value: 1.76E-5

HT12-COPD

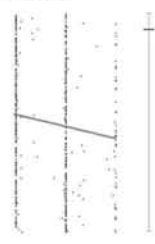

TT (202) TC (202) CC (49)  
Corr: -0.124 R2: 0.015  
Z-Score: -2.649 P-Value: 0.038

HT12-ALS

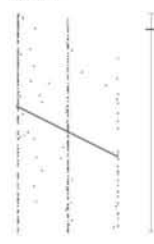

TT (148) TC (145) CC (31)  
Corr: -0.247 R2: 0.061  
Z-Score: -4.504 P-Value: 6.66E-6

HT12-UC

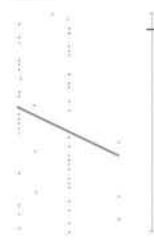

TT (21) TC (25) CC (3)  
Corr: -0.215 R2: 0.046  
Z-Score: -1.487 P-Value: 0.137

HBv2-Controls

eQTL not available  
Probe not present.

HBv2-ColicDisease

eQTL not available  
Probe not present.

HBv2-ALS

eQTL not available  
Probe not present.

SNP rs12485738 (chr. 3, 56942616 bp)  
Probe 8560388 (chr. 2, 73781171 - 73781171 bp),  
P-Value 2.54E-11

HT12-Controls

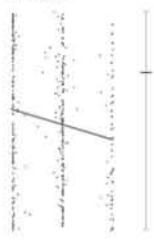

GG (153) GA (194) AA (67)  
Corr: -0.164 R2: 0.027  
Z-Score: -3.348 P-Value: 5.2E-4

HT12-COPD

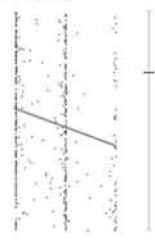

GG (202) GA (200) AA (51)  
Corr: -0.189 R2: 0.036  
Z-Score: -4.653 P-Value: 5.05E-5

HT12-ALS

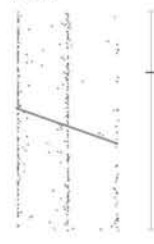

GG (132) GA (148) AA (44)  
Corr: -0.183 R2: 0.033  
Z-Score: -3.302 P-Value: 9.6E-4

HT12-UC

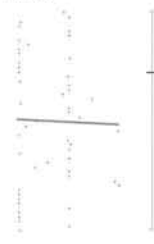

GG (24) GA (22) AA (3)  
Corr: -0.02 R2: 0  
Z-Score: -0.136 P-Value: 0.892

HBv2-Controls

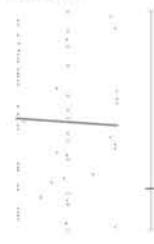

GG (88) GA (21) AA (10)  
Corr: -0.036 R2: 0.001  
Z-Score: -0.274 P-Value: 0.784

HBv2-ColicDisease

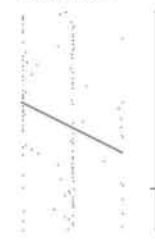

GG (41) GA (57) AA (10)  
Corr: -0.249 R2: 0.062  
Z-Score: -2.636 P-Value: 0.008

HBv2-ALS

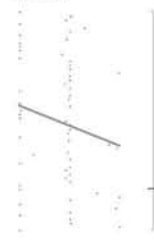

GG (20) GA (32) AA (7)  
Corr: -0.189 R2: 0.036  
Z-Score: -1.437 P-Value: 0.151

SNP rs12485738 (chr. 3, 56942616 bp)  
Probe 4800600 (chr. 6, 43001464 - 43001464 bp),  
P-Value 1.6E-11

HT12-Controls

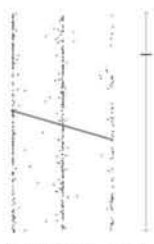

GG (153) GA (194) AA (67)  
Corr: -0.154 R2: 0.024  
Z-Score: -3.141 P-Value: 0.002

HT12-COPD

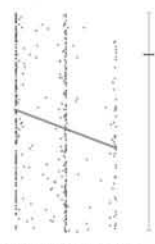

GG (202) GA (200) AA (51)  
Corr: -0.195 R2: 0.038  
Z-Score: -4.164 P-Value: 2.66E-5

HT12-ALS

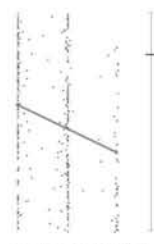

GG (132) GA (148) AA (44)  
Corr: -0.252 R2: 0.063  
Z-Score: -4.587 P-Value: 4.49E-6

HT12-UC

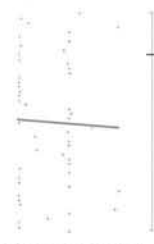

GG (24) GA (22) AA (3)  
Corr: -0.036 R2: 0.001  
Z-Score: -0.247 P-Value: 0.805

HBv2-Controls

eQTL not available  
Probe not present.

HBv2-ColicDisease

eQTL not available  
Probe not present.

HBv2-ALS

eQTL not available  
Probe not present.

SNP rs3117582 (chr. 6, 31728499 bp)  
Probe 6380347 (chr. 25, 40348241 - 40390996 bp), XPOC6  
P-Value 1.52E-11

HT12-Controls

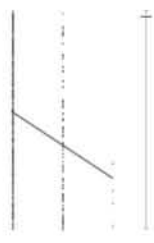

TT (311) TG (89) GG (4)  
Corr: -0.239 R2: 0.057  
Z-Score: -4.913 P-Value: 6.96E-7

HT12-COPD

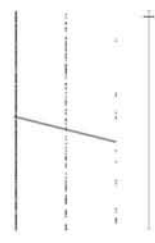

TT (338) TG (101) GG (16)  
Corr: -0.103 R2: 0.011  
Z-Score: -2.19 P-Value: 0.029

HT12-ALS

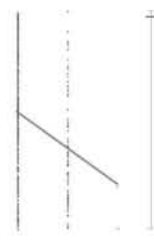

TT (248) TG (74) GG (2)  
Corr: -0.251 R2: 0.063  
Z-Score: -4.577 P-Value: 4.72E-6

HT12-UC

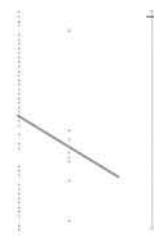

TT (41) TG (8) GG (3)  
Corr: -0.178 R2: 0.031  
Z-Score: -1.208 P-Value: 0.227

HBv2-Controls

eQTL not available  
Probe not present.

HBv2-ColicDisease

eQTL not available  
Probe not present.

HBv2-ALS

eQTL not available  
Probe not present.

SNP rs2523303 (chr. 6, 29813638 bp)  
Probe 8960017 (chr. 4, 109229903 - 109304132 bp), LEF1  
P-Value 1.36E-11

HT12-Controls

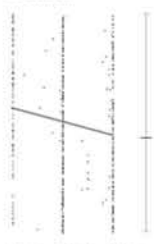

GG (72) GA (196) AA (146)  
Corr: -0.146 R2: 0.021  
Z-Score: -2.968 P-Value: 0.003

HT12-COPD

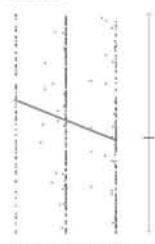

GG (75) GA (221) AA (157)  
Corr: -0.218 R2: 0.048  
Z-Score: -4.692 P-Value: 2.71E-6

HT12-ALS

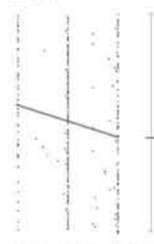

GG (53) GA (158) AA (113)  
Corr: -0.173 R2: 0.03  
Z-Score: -3.126 P-Value: 0.002

HT12-UC

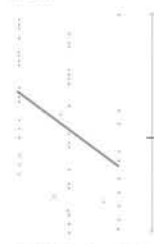

GG (18) GA (20) AA (11)  
Corr: -0.43 R2: 0.185  
Z-Score: -3.063 P-Value: 0.002

HBv2-Controls

eQTL not available  
Probe not present.

HBv2-ColicDisease

eQTL not available  
Probe not present.

HBv2-ALS

eQTL not available  
Probe not present.

SNP rs13437002 (chr. 6, 31462539 bp)  
Probe 1110300 (chr. 4, 153765727 - 153821641 bp), TMEM154  
P-Value: 1.29E-11

HT12-Controls

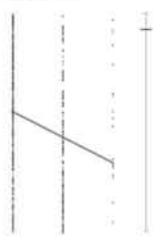

CC (248) CT (140) TT (17)  
Corr: -0.232 R2: 0.054  
Z-Score: -4.772 P-Value: 1.82E-6

HT12-COPD

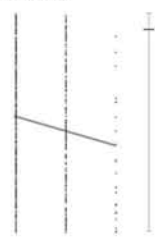

CC (260) CT (180) TT (24)  
Corr: -0.137 R2: 0.019  
Z-Score: -2.926 P-Value: 0.003

HT12-ALS

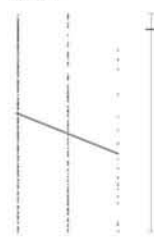

CC (188) CT (112) TT (23)  
Corr: -0.198 R2: 0.039  
Z-Score: -3.592 P-Value: 3.28E-4

HT12-UC

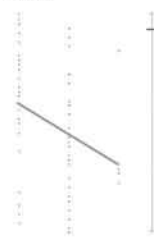

CC (22) CT (33) TT (4)  
Corr: -0.301 R2: 0.09  
Z-Score: -2.098 P-Value: 0.036

HBv2-Controls

eQTL not available  
Probe not present.

HBv2-CeliacDisease

eQTL not available  
Probe not present.

HBv2-ALS

eQTL not available  
Probe not present.

SNP rs12485738 (chr. 3, 56840816 bp)  
Probe 1580025 (chr. 7, 93387952 - 93394760 bp), GNG11  
P-Value: 1.19E-11

HT12-Controls

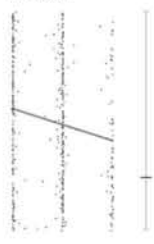

GG (153) GA (194) AA (67)  
Corr: -0.175 R2: 0.03  
Z-Score: -3.589 P-Value: 3.58E-4

HT12-COPD

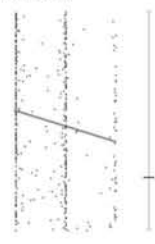

GG (202) GA (200) AA (51)  
Corr: -0.156 R2: 0.024  
Z-Score: -3.328 P-Value: 8.74E-4

HT12-ALS

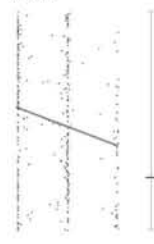

GG (132) GA (148) AA (44)  
Corr: -0.156 R2: 0.039  
Z-Score: -3.556 P-Value: 3.74E-4

HT12-UC

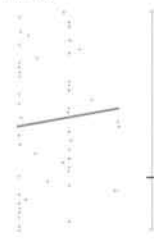

GG (24) GA (22) AA (3)  
Corr: -0.085 R2: 0.007  
Z-Score: -0.582 P-Value: 0.561

HBv2-Controls

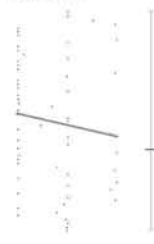

GG (28) GA (21) AA (10)  
Corr: -0.128 R2: 0.016  
Z-Score: -0.985 P-Value: 0.325

HBv2-CeliacDisease

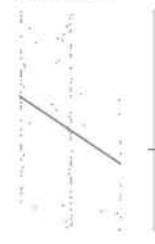

GG (41) GA (57) AA (10)  
Corr: -0.33 R2: 0.109  
Z-Score: -3.533 P-Value: 4.12E-4

HBv2-ALS

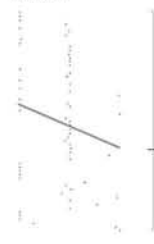

GG (20) GA (32) AA (7)  
Corr: -0.204 R2: 0.042  
Z-Score: -1.352 P-Value: 0.121

SNP rs9298877 (chr. 6, 32539125 bp)  
Probe 1000739 (chr. 2, 108570199 - 108671134 bp), LIMS1  
P-Value: 1.02E-11

HT12-Controls

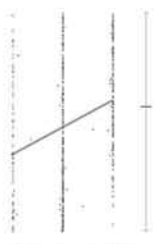

AA (61) AG (212) GG (141)  
Corr: 0.287 R2: 0.082  
Z-Score: 5.948 P-Value: 2.71E-9

HT12-COPD

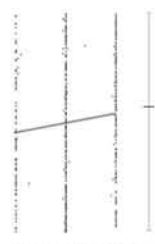

AA (61) AG (214) GG (148)  
Corr: 0.109 R2: 0.012  
Z-Score: 2.321 P-Value: 0.02

HT12-ALS

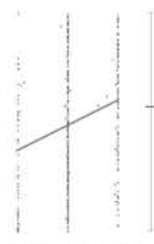

AA (50) AG (179) GG (95)  
Corr: 0.256 R2: 0.066  
Z-Score: 4.688 P-Value: 3.04E-6

HT12-UC

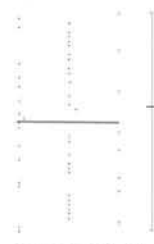

AA (18) AG (25) GG (8)  
Corr: -0.009 R2: 0  
Z-Score: -0.061 P-Value: 0.951

HBv2-Controls

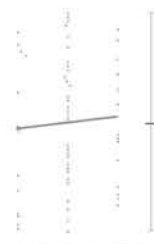

AA (13) AG (32) GG (14)  
Corr: 0.064 R2: 0.004  
Z-Score: 0.48 P-Value: 0.631

HBv2-CeliacDisease

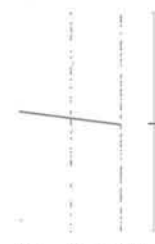

AA (1) AG (42) GG (88)  
Corr: -0.054 R2: 0.003  
Z-Score: -0.563 P-Value: 0.573

HBv2-ALS

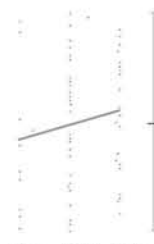

AA (10) AG (28) GG (21)  
Corr: 0.155 R2: 0.024  
Z-Score: 1.171 P-Value: 0.241

SNP rs9272546 (chr. 6, 32712350 bp)  
Probe 1000739 (chr. 2, 108570199 - 108671134 bp), LIMS1  
P-Value: 1.01E-11

HT12-Controls

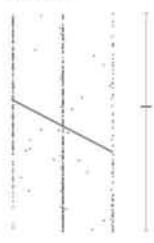

AA (130) AG (214) GG (70)  
Corr: -0.278 R2: 0.078  
Z-Score: -5.763 P-Value: 8.25E-9

HT12-COPD

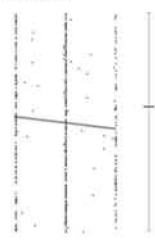

AA (184) AG (235) GG (84)  
Corr: -0.068 R2: 0.005  
Z-Score: -1.439 P-Value: 0.15

HT12-ALS

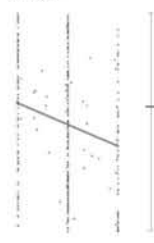

AA (97) AG (165) GG (62)  
Corr: -0.232 R2: 0.054  
Z-Score: -4.225 P-Value: 2.39E-5

HT12-UC

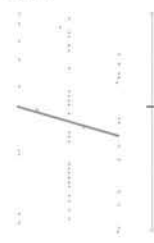

AA (10) AG (20) GG (13)  
Corr: -0.151 R2: 0.023  
Z-Score: -1.033 P-Value: 0.301

HBv2-Controls

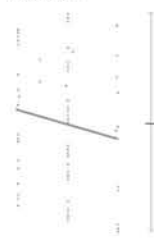

AA (20) AG (28) GG (11)  
Corr: -0.159 R2: 0.025  
Z-Score: -1.203 P-Value: 0.229

HBv2-CeliacDisease

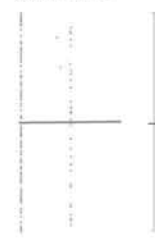

AA (79) AG (32) GG (0)  
Corr: 0.003 R2: 0  
Z-Score: 0.028 P-Value: 0.978

HBv2-ALS

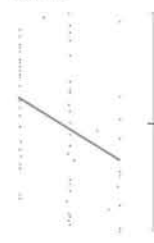

AA (24) AG (29) GG (13)  
Corr: -0.351 R2: 0.123  
Z-Score: 2.727 P-Value: 0.006

SNP rs12485738 (chr. 3, 56840816 bp)  
Probe 2230563 (chr. 4, 75070622 - 75073764 bp), PPBP  
P-Value: 6.43E-12

HT12-Controls

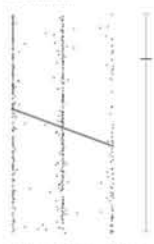

GG (153) GA (194) AA (67)  
Corr: -0.202 R2: 0.041  
Z-Score: -4.15 P-Value: 3.32E-5

HT12-COPD

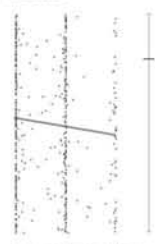

GG (202) GA (200) AA (51)  
Corr: -0.088 R2: 0.007  
Z-Score: -1.823 P-Value: 0.068

HT12-ALS

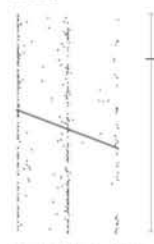

GG (132) GA (148) AA (44)  
Corr: 0.2 R2: 0.04  
Z-Score: 3.614 P-Value: 3.01E-4

HT12-UC

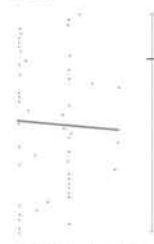

GG (24) GA (22) AA (3)  
Corr: -0.045 R2: 0.002  
Z-Score: -0.306 P-Value: 0.76

HBv2-Controls

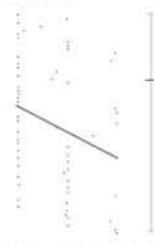

GG (28) GA (21) AA (10)  
Corr: -0.285 R2: 0.081  
Z-Score: -2.188 P-Value: 0.029

HBv2-CeliacDisease

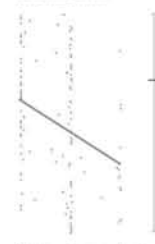

GG (41) GA (57) AA (10)  
Corr: -0.314 R2: 0.099  
Z-Score: -3.356 P-Value: 7.91E-4

HBv2-ALS

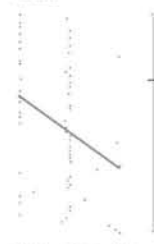

GG (20) GA (32) AA (7)  
Corr: -0.346 R2: 0.12  
Z-Score: -2.688 P-Value: 0.007

SNP rs12485738 (chr. 3, 56840616 bp)  
Probe 1770170 (chr. 3, 37877673 - 38001964 bp), CTDSPL  
P-Value 5.51E-12

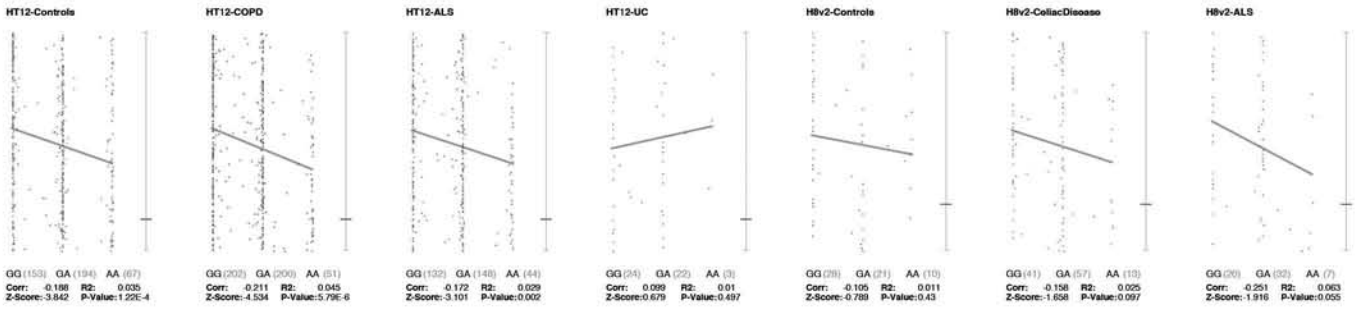

SNP rs227139 (chr. 6, 32521437 bp)  
Probe 2940424 (chr. 7, 36518135 - 36731956 bp), AOH1  
P-Value 5.08E-12

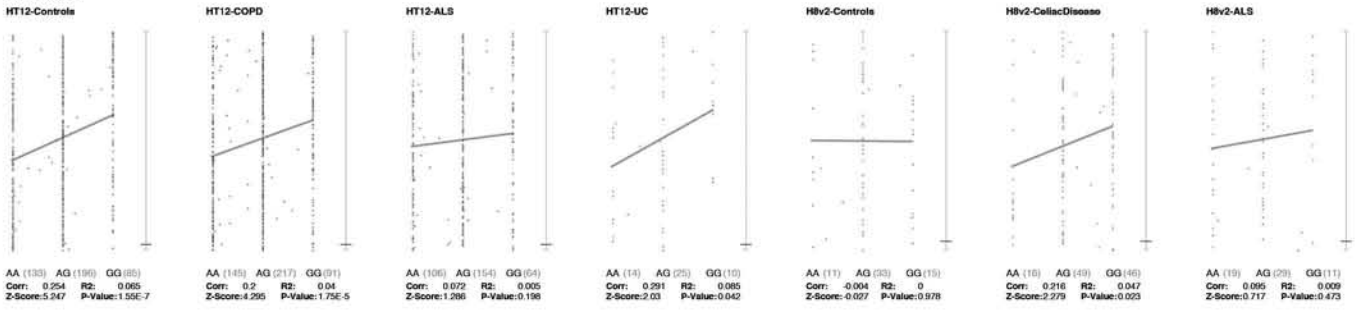

SNP rs134792 (chr. 6, 3142000 bp)  
Probe 1110300 (chr. 4, 19376727 - 19382164 bp), TMEM154  
P-Value 1.68E-12

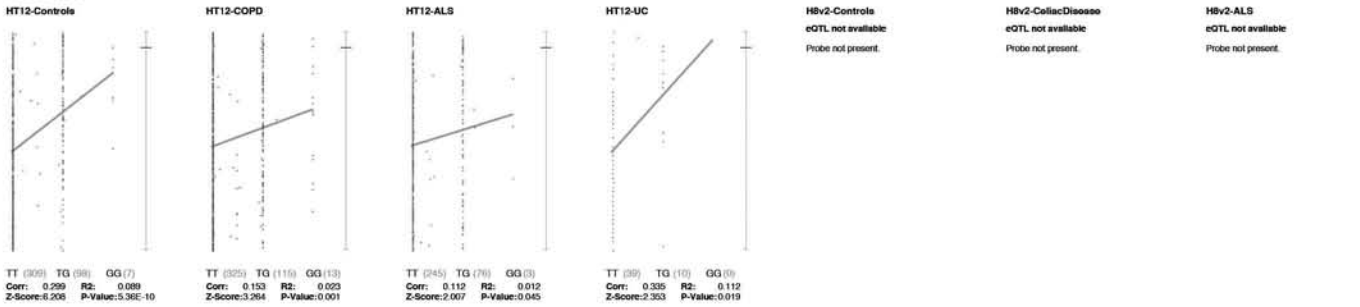

SNP rs12485738 (chr. 3, 56840616 bp)  
Probe 6040259 (chr. 17, 6948959 - 6856128 bp), ALOX12@AC027763.2  
P-Value 1.37E-12

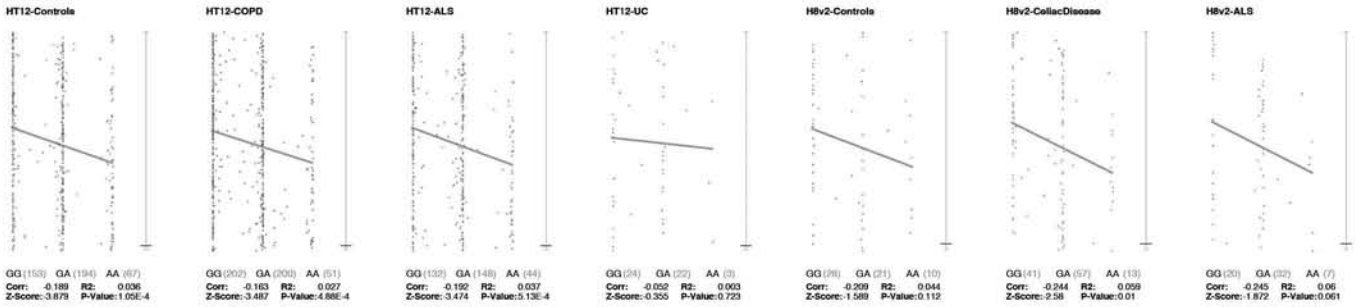

SNP rs227139 (chr. 6, 32521437 bp)  
Probe 2570703 (chr. 21, 38672819 - 38956480 bp), EFG  
P-Value 1.08E-12

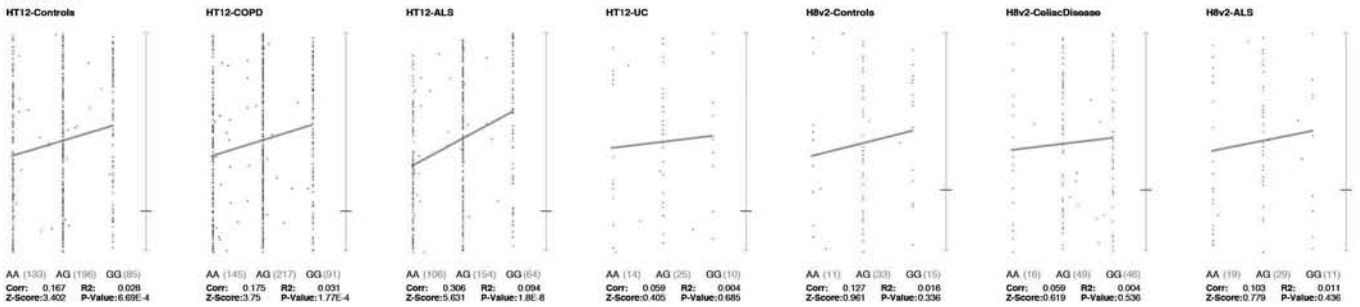



SNP rs12485738 (chr. 3, 56840616 bp)  
Probe 7570196 (chr. 12, 3055818 - 3266990 bp), TSPAN2  
P-Value 3.89E-13

HT12-Controls

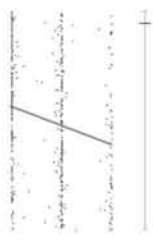

GG (153) GA (194) AA (67)  
Corr: -0.295 R2: 0.042  
Z-Score: -4.197 P-Value: 2.71E-5

HT12-COPD

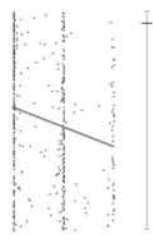

GG (202) GA (200) AA (51)  
Corr: -0.201 R2: 0.04  
Z-Score: -4.308 P-Value: 1.65E-5

HT12-ALS

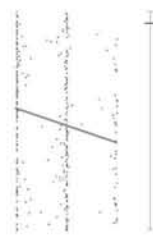

GG (132) GA (148) AA (44)  
Corr: -0.176 R2: 0.031  
Z-Score: -3.178 P-Value: 0.001

HT12-UC

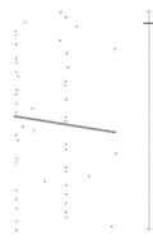

GG (24) GA (22) AA (3)  
Corr: -0.077 R2: 0.006  
Z-Score: -0.523 P-Value: 0.601

HBv2-Controls

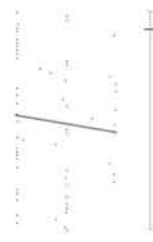

GG (28) GA (21) AA (10)  
Corr: -0.097 R2: 0.009  
Z-Score: -0.729 P-Value: 0.468

HBv2-ColiacDisease

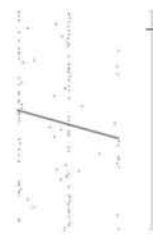

GG (41) GA (57) AA (13)  
Corr: -0.139 R2: 0.019  
Z-Score: -1.46 P-Value: 0.144

HBv2-ALS

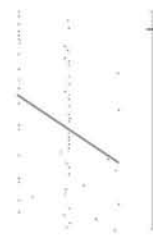

GG (20) GA (32) AA (7)  
Corr: -0.332 R2: 0.104  
Z-Score: -2.485 P-Value: 0.013

SNP rs4963128 (chr. 11, 579564 bp)  
Probe 2000670 (chr. 21, 43452479 - 43452479 bp), -  
P-Value 3.83E-13

HT12-Controls

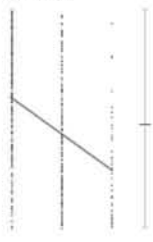

CC (207) CT (160) TT (41)  
Corr: -0.376 R2: 0.141  
Z-Score: -7.913 P-Value: 2.51E-15

HT12-COPD

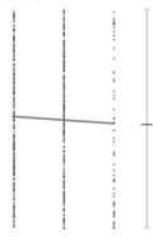

CC (200) CT (189) TT (54)  
Corr: -0.033 R2: 0.001  
Z-Score: -0.708 P-Value: 0.479

HT12-ALS

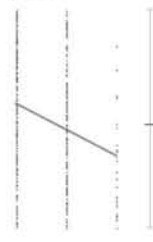

CC (162) CT (135) TT (27)  
Corr: -0.263 R2: 0.089  
Z-Score: -4.809 P-Value: 1.51E-6

HT12-UC

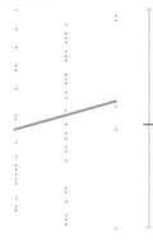

CC (18) CT (25) TT (8)  
Corr: -0.141 R2: 0.02  
Z-Score: -0.965 P-Value: 0.334

HBv2-Controls

eQTL not available  
Probe not present.

HBv2-ColiacDisease

eQTL not available  
Probe not present.

HBv2-ALS

eQTL not available  
Probe not present.

SNP rs12485738 (chr. 3, 56840616 bp)  
Probe 130433 (chr. 11, 69959459 - 69960075 bp), CTNN  
P-Value 3.31E-13

HT12-Controls

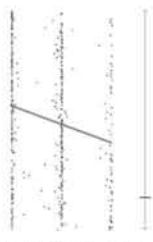

GG (153) GA (194) AA (67)  
Corr: -0.2 R2: 0.04  
Z-Score: -4.093 P-Value: 4.26E-5

HT12-COPD

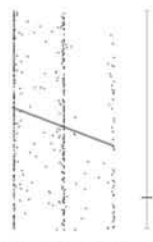

GG (202) GA (200) AA (51)  
Corr: -0.196 R2: 0.038  
Z-Score: -4.193 P-Value: 2.75E-5

HT12-ALS

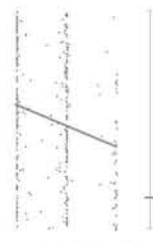

GG (132) GA (148) AA (44)  
Corr: -0.217 R2: 0.047  
Z-Score: -3.943 P-Value: 8.03E-5

HT12-UC

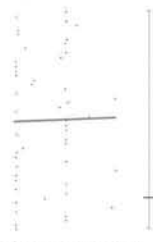

GG (24) GA (22) AA (3)  
Corr: -0.016 R2: 0  
Z-Score: -0.111 P-Value: 0.911

HBv2-Controls

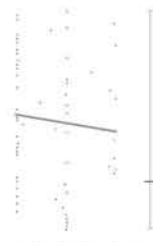

GG (28) GA (21) AA (10)  
Corr: -0.095 R2: 0.009  
Z-Score: -0.718 P-Value: 0.473

HBv2-ColiacDisease

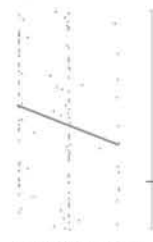

GG (41) GA (57) AA (13)  
Corr: -0.188 R2: 0.035  
Z-Score: -1.975 P-Value: 0.048

HBv2-ALS

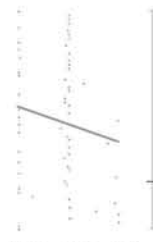

GG (20) GA (32) AA (7)  
Corr: -0.169 R2: 0.029  
Z-Score: -1.279 P-Value: 0.201

SNP rs12485738 (chr. 3, 56840616 bp)  
Probe 50136 (chr. 14, 22914857 - 22915820 bp), CMT5  
P-Value 3.03E-13

HT12-Controls

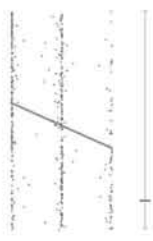

GG (153) GA (194) AA (67)  
Corr: -0.243 R2: 0.059  
Z-Score: -5.002 P-Value: 5.69E-7

HT12-COPD

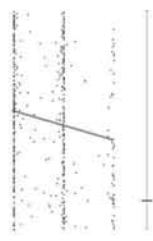

GG (202) GA (200) AA (51)  
Corr: -0.152 R2: 0.023  
Z-Score: -3.238 P-Value: 0.001

HT12-ALS

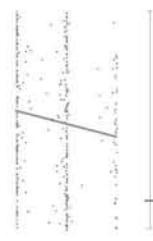

GG (132) GA (148) AA (44)  
Corr: -0.136 R2: 0.019  
Z-Score: -2.458 P-Value: 0.014

HT12-UC

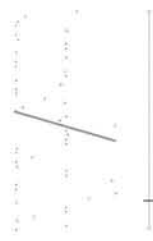

GG (24) GA (22) AA (3)  
Corr: -0.133 R2: 0.018  
Z-Score: -0.912 P-Value: 0.362

HBv2-Controls

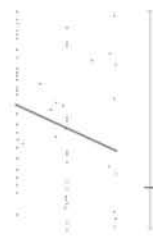

GG (28) GA (21) AA (10)  
Corr: -0.25 R2: 0.062  
Z-Score: -1.907 P-Value: 0.057

HBv2-ColiacDisease

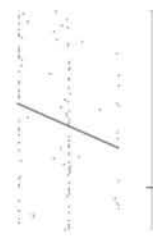

GG (41) GA (57) AA (13)  
Corr: -0.214 R2: 0.046  
Z-Score: -2.252 P-Value: 0.024

HBv2-ALS

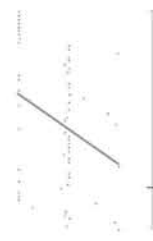

GG (20) GA (32) AA (7)  
Corr: -0.332 R2: 0.11  
Z-Score: -2.567 P-Value: 0.01

SNP rs12485738 (chr. 3, 56840616 bp)  
Probe 140069 (chr. 11, 133484788 - 133664241 bp), JAM3/NCAPD3  
P-Value 2.2E-13

HT12-Controls

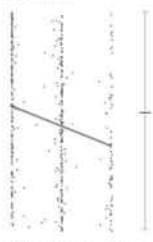

GG (153) GA (194) AA (67)  
Corr: -0.221 R2: 0.049  
Z-Score: -4.536 P-Value: 5.74E-6

HT12-COPD

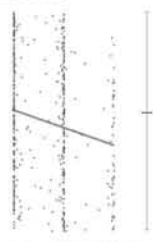

GG (202) GA (200) AA (51)  
Corr: -0.181 R2: 0.033  
Z-Score: -3.866 P-Value: 1.11E-4

HT12-ALS

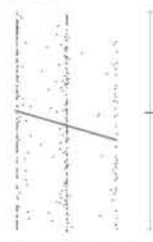

GG (132) GA (148) AA (44)  
Corr: -0.148 R2: 0.022  
Z-Score: -2.679 P-Value: 0.007

HT12-UC

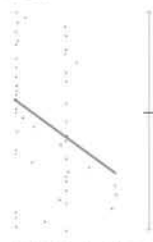

GG (24) GA (22) AA (3)  
Corr: -0.336 R2: 0.113  
Z-Score: -2.361 P-Value: 0.018

HBv2-Controls

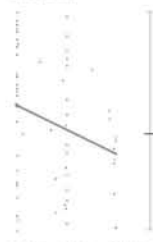

GG (28) GA (21) AA (10)  
Corr: -0.272 R2: 0.074  
Z-Score: -2.084 P-Value: 0.037

HBv2-ColiacDisease

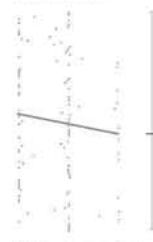

GG (41) GA (57) AA (13)  
Corr: -0.095 R2: 0.009  
Z-Score: -0.996 P-Value: 0.319

HBv2-ALS

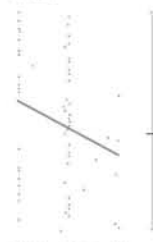

GG (20) GA (32) AA (7)  
Corr: -0.256 R2: 0.065  
Z-Score: -1.954 P-Value: 0.051

SNP rs9483768 (chr. 6, 135477194 bp)  
Probe 3130220 (chr. 3, 45240621 - 45243523 bp), ACO10170.3  
P-Value 7.83E-14

HT12-Controls

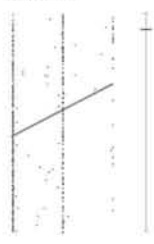

TT (259) TC (100) CC (25)  
Corr: 0.245 R2: 0.06  
Z-Score:5.057 P-Value:4.25E-7

HT12-COPD

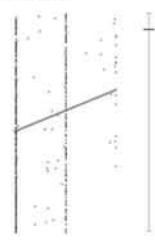

TT (276) TC (155) CC (22)  
Corr: 0.188 R2: 0.035  
Z-Score:4.02 P-Value:5.91E-5

HT12-ALS

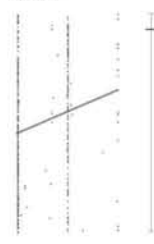

TT (186) TC (121) CC (17)  
Corr: 0.199 R2: 0.04  
Z-Score:3.613 P-Value:3.03E-4

HT12-UC

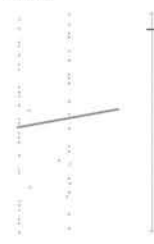

TT (27) TC (22) CC (0)  
Corr: 0.067 R2: 0.004  
Z-Score:0.456 P-Value:0.649

HBv2-Controls

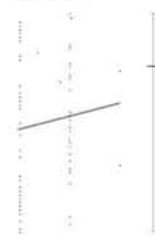

TT (302) TC (25) CC (2)  
Corr: 0.111 R2: 0.012  
Z-Score:0.84 P-Value:0.401

HBv2-ColicDisease

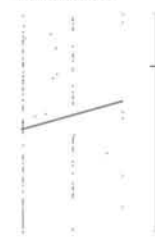

TT (66) TC (38) CC (7)  
Corr: 0.134 R2: 0.018  
Z-Score:1.407 P-Value:0.16

HBv2-ALS

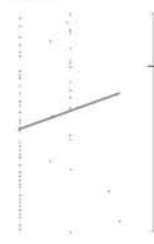

TT (38) TC (19) CC (2)  
Corr: 0.151 R2: 0.023  
Z-Score:1.139 P-Value:0.255

SNP rs2540917 (chr. 2, 80482963 bp)  
Probe 3440630 (chr. 1, 6424816 - 6447223 bp), ESPN1/TNF/RSF25  
P-Value 4.78E-14

HT12-Controls

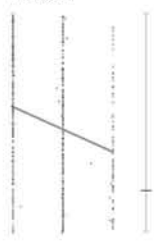

TT (170) TC (181) CC (63)  
Corr: 0.252 R2: 0.063  
Z-Score:5.188 P-Value:2.12E-7

HT12-COPD

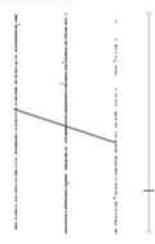

TT (151) TC (222) CC (80)  
Corr: 0.183 R2: 0.033  
Z-Score:3.913 P-Value:9.12E-5

HT12-ALS

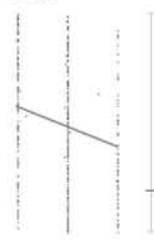

TT (110) TC (157) CC (57)  
Corr: 0.22 R2: 0.048  
Z-Score:3.995 P-Value:6.48E-5

HT12-UC

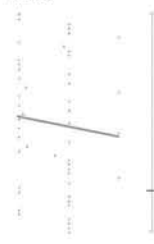

TT (20) TC (25) CC (4)  
Corr: 0.093 R2: 0.009  
Z-Score:0.638 P-Value:0.523

HBv2-Controls

eQTL not available  
Probe not present.

HBv2-ColicDisease

eQTL not available  
Probe not present.

HBv2-ALS

eQTL not available  
Probe not present.

SNP rs7743761 (chr. 6, 31444079 bp)  
Probe 1110300 (chr. 4, 19378727 - 19382164 bp), TMEM154  
P-Value 9.26E-15

HT12-Controls

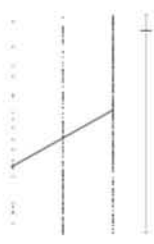

AA (23) AC (156) CC (255)  
Corr: 0.269 R2: 0.072  
Z-Score:5.555 P-Value:2.78E-8

HT12-COPD

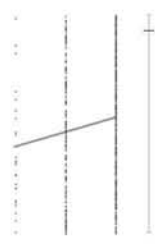

AA (24) AC (156) CC (275)  
Corr: 0.136 R2: 0.019  
Z-Score:2.91 P-Value:0.004

HT12-ALS

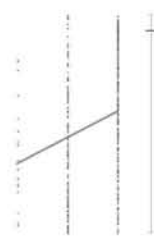

AA (19) AC (120) CC (185)  
Corr: 0.253 R2: 0.064  
Z-Score:4.605 P-Value:4.12E-6

HT12-UC

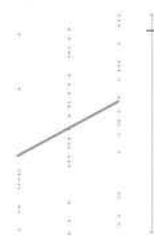

AA (10) AC (21) CC (18)  
Corr: 0.307 R2: 0.094  
Z-Score:2.145 P-Value:0.032

HBv2-Controls

eQTL not available  
Probe not present.

HBv2-ColicDisease

eQTL not available  
Probe not present.

HBv2-ALS

eQTL not available  
Probe not present.

SNP rs3134792 (chr. 6, 31420305 bp)  
Probe 6380347 (chr. 25, 40348041 - 40390998 bp), XFC6C  
P-Value 1.4E-15

HT12-Controls

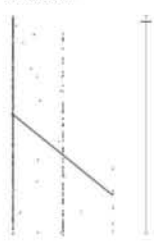

TT (309) TG (98) GG (7)  
Corr: -0.306 R2: 0.093  
Z-Score:6.35 P-Value:2.15E-10

HT12-COPD

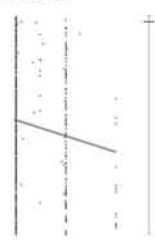

TT (226) TG (115) GG (13)  
Corr: -0.132 R2: 0.017  
Z-Score:2.805 P-Value:0.005

HT12-ALS

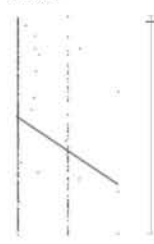

TT (245) TG (70) GG (5)  
Corr: -0.243 R2: 0.059  
Z-Score:4.42 P-Value:9.89E-6

HT12-UC

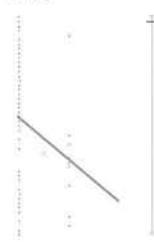

TT (38) TG (10) GG (0)  
Corr: -0.253 R2: 0.064  
Z-Score:1.752 P-Value:0.08

HBv2-Controls

eQTL not available  
Probe not present.

HBv2-ColicDisease

eQTL not available  
Probe not present.

HBv2-ALS

eQTL not available  
Probe not present.

SNP rs2856683 (chr. 6, 32763196 bp)  
Probe 2940424 (chr. 7, 36518135 - 36731995 bp), AOH1  
P-Value 7.35E-16

HT12-Controls

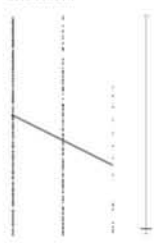

TT (251) TG (148) GG (15)  
Corr: -0.227 R2: 0.051  
Z-Score:4.657 P-Value:3.2E-6

HT12-COPD

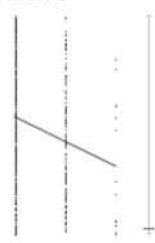

TT (306) TG (132) GG (15)  
Corr: -0.213 R2: 0.045  
Z-Score:4.579 P-Value:4.66E-6

HT12-ALS

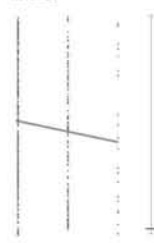

TT (195) TG (108) GG (20)  
Corr: -0.104 R2: 0.011  
Z-Score:1.864 P-Value:0.062

HT12-UC

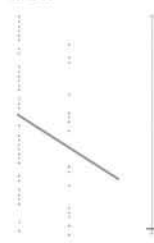

TT (33) TG (16) GG (0)  
Corr: -0.234 R2: 0.055  
Z-Score:1.617 P-Value:0.106

HBv2-Controls

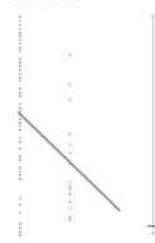

TT (44) TG (15) GG (0)  
Corr: -0.329 R2: 0.108  
Z-Score:2.546 P-Value:0.011

HBv2-ColicDisease

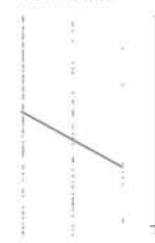

TT (65) TG (28) GG (8)  
Corr: -0.269 R2: 0.072  
Z-Score:2.852 P-Value:0.004

HBv2-ALS

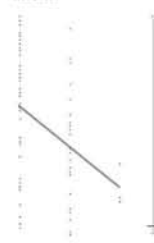

TT (34) TG (22) GG (0)  
Corr: -0.371 R2: 0.138  
Z-Score:2.895 P-Value:0.004

SNP rs12718597 (chr. 7, 50395922 bp)  
Probe 3170017 (chr. 17, 21127561 - 21160118 bp), MAP2K3  
P-Value 1.04E-16

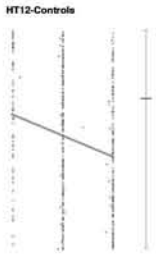

AA (64) AC (197) CC (153)  
Corr: -0.298 R2: 0.052  
Z-Score: -4.695 P-Value: 3.67E-6

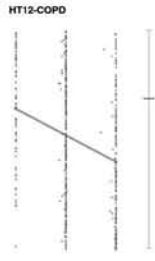

AA (68) AC (220) CC (159)  
Corr: -0.281 R2: 0.079  
Z-Score: -6.086 P-Value: 1.19E-9

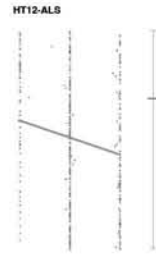

AA (50) AC (163) CC (105)  
Corr: -0.187 R2: 0.035  
Z-Score: -3.38 P-Value: 7.25E-4

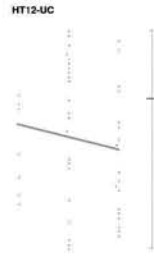

AA (7) AC (23) CC (119)  
Corr: -0.135 R2: 0.018  
Z-Score: -0.926 P-Value: 0.355

HbV2-Controls  
eQTL not available  
Probe not present.

HbV2-ColicacDisease  
eQTL not available  
Probe not present.

HbV2-ALS  
eQTL not available  
Probe not present.

SNP rs12485738 (chr. 3, 56840616 bp)  
Probe 1050292 (chr. 3, 13028135 - 13028493 bp), GP9  
P-Value 9.97E-17

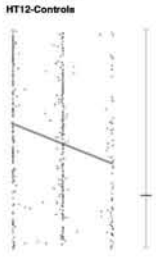

GG (153) GA (194) AA (67)  
Corr: -0.219 R2: 0.048  
Z-Score: -4.488 P-Value: 7.18E-6

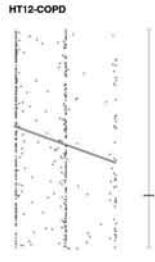

GG (200) GA (200) AA (51)  
Corr: -0.185 R2: 0.034  
Z-Score: -3.958 P-Value: 7.57E-5

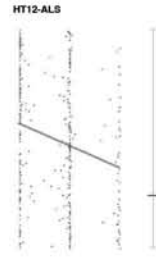

GG (132) GA (148) AA (44)  
Corr: -0.231 R2: 0.053  
Z-Score: -4.191 P-Value: 2.78E-5

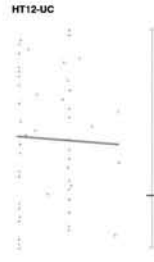

GG (24) GA (22) AA (3)  
Corr: -0.034 R2: 0.001  
Z-Score: -0.232 P-Value: 0.817

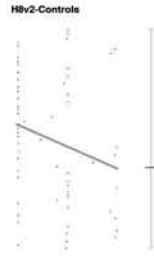

GG (88) GA (21) AA (10)  
Corr: -0.242 R2: 0.058  
Z-Score: -1.844 P-Value: 0.069

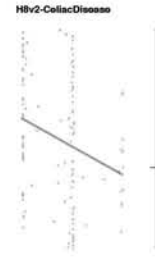

GG (41) GA (57) AA (10)  
Corr: -0.276 R2: 0.076  
Z-Score: -2.929 P-Value: 0.003

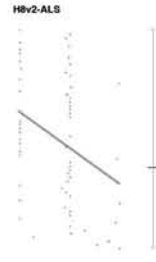

GG (20) GA (32) AA (7)  
Corr: -0.34 R2: 0.116  
Z-Score: -2.635 P-Value: 0.008

SNP rs12718597 (chr. 7, 50395922 bp)  
Probe 4016433 (chr. 17, 21127561 - 21160118 bp), MAP2K3  
P-Value 4.72E-17

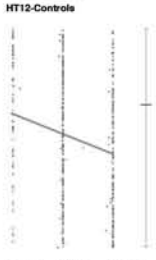

AA (64) AC (197) CC (153)  
Corr: -0.232 R2: 0.047  
Z-Score: -4.457 P-Value: 8.29E-6

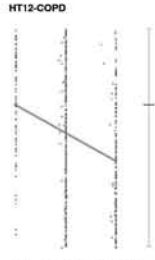

AA (68) AC (220) CC (159)  
Corr: -0.3 R2: 0.09  
Z-Score: -6.528 P-Value: 6.67E-11

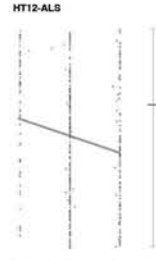

AA (50) AC (163) CC (105)  
Corr: -0.183 R2: 0.034  
Z-Score: -3.314 P-Value: 3.2E-4

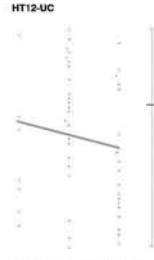

AA (7) AC (23) CC (119)  
Corr: -0.138 R2: 0.019  
Z-Score: -0.942 P-Value: 0.348

HbV2-Controls  
eQTL not available  
Probe not present.

HbV2-ColicacDisease  
eQTL not available  
Probe not present.

HbV2-ALS  
eQTL not available  
Probe not present.

SNP rs9402686 (chr. 6, 135469510 bp)  
Probe 3130220 (chr. 3, 45940621 - 45943623 bp), AC010170.3  
P-Value 3.83E-17

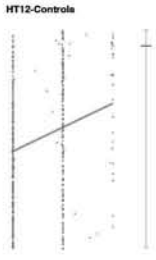

GG (218) GA (180) AA (27)  
Corr: 0.232 R2: 0.054  
Z-Score: 4.779 P-Value: 1.77E-6

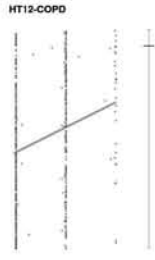

GG (235) GA (188) AA (30)  
Corr: 0.242 R2: 0.059  
Z-Score: 5.212 P-Value: 1.87E-7

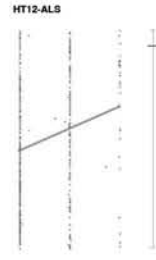

GG (179) GA (117) AA (28)  
Corr: 0.226 R2: 0.051  
Z-Score: 4.11 P-Value: 3.95E-5

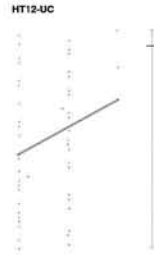

GG (24) GA (22) AA (3)  
Corr: 0.26 R2: 0.068  
Z-Score: 1.805 P-Value: 0.071

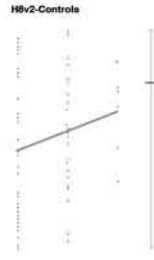

GG (30) GA (23) AA (6)  
Corr: 0.201 R2: 0.04  
Z-Score: 1.528 P-Value: 0.127

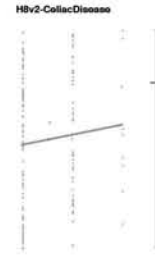

GG (62) GA (40) AA (9)  
Corr: 0.099 R2: 0.01  
Z-Score: 1.039 P-Value: 0.299

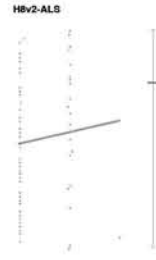

GG (38) GA (20) AA (1)  
Corr: 0.094 R2: 0.009  
Z-Score: 0.706 P-Value: 0.48

SNP rs4903128 (chr. 11, 579564 bp)  
Probe 150328 (chr. 1, 14015613 - 14022280 bp), PRDM2  
P-Value 1.9E-17

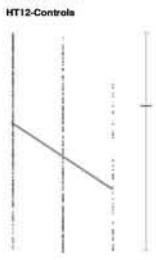

CC (207) CT (190) TT (41)  
Corr: -0.347 R2: 0.12  
Z-Score: 7.257 P-Value: 3.97E-13

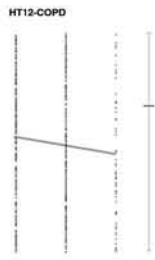

CC (200) CT (199) TT (54)  
Corr: -0.093 R2: 0.009  
Z-Score: 1.984 P-Value: 0.047

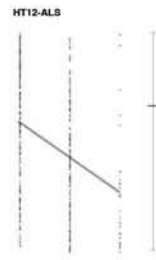

CC (162) CT (135) TT (27)  
Corr: -0.353 R2: 0.124  
Z-Score: 6.536 P-Value: 6.3E-11

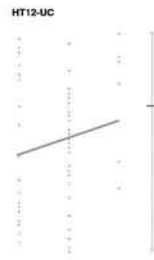

CC (18) CT (25) TT (8)  
Corr: 0.174 R2: 0.03  
Z-Score: 1.195 P-Value: 0.232

HbV2-Controls  
eQTL not available  
Probe not present.

HbV2-ColicacDisease  
eQTL not available  
Probe not present.

HbV2-ALS  
eQTL not available  
Probe not present.

SNP rs9373124 (chr. 6, 135464902 bp)  
Probe 3130220 (chr. 3, 45240621 - 45243623 bp), AC010170.3  
P-Value 1.71E-17

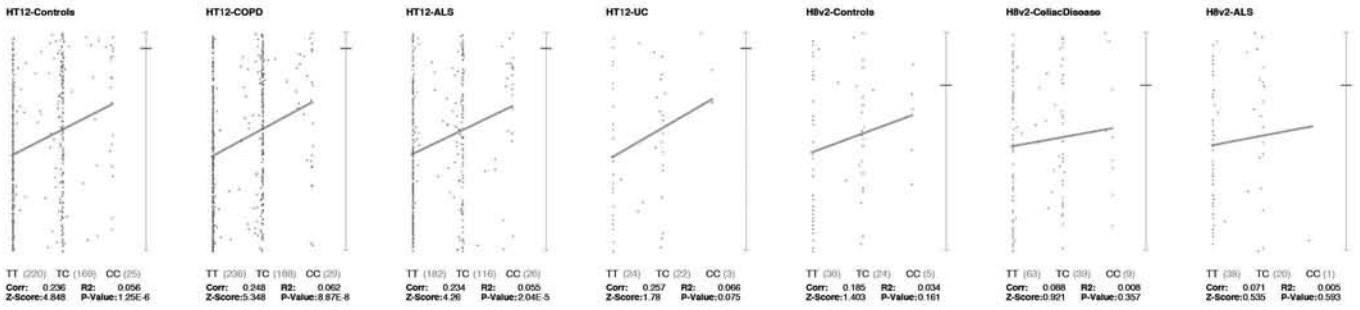

SNP rs9378092 (chr. 6, 135466837 bp)  
Probe 3130220 (chr. 3, 45240621 - 45243623 bp), AC010170.3  
P-Value 1.59E-17

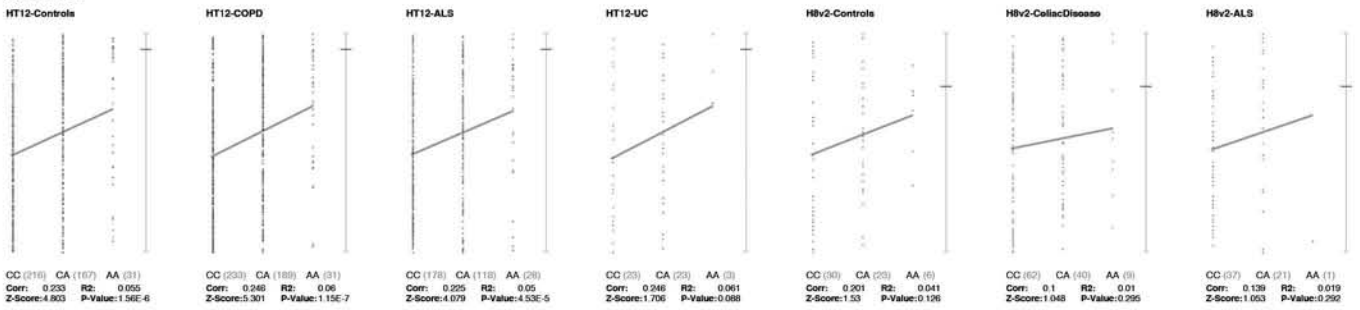

SNP rs4895441 (chr. 6, 135466266 bp)  
Probe 3130220 (chr. 3, 45240621 - 45243623 bp), AC010170.3  
P-Value 1.12E-17

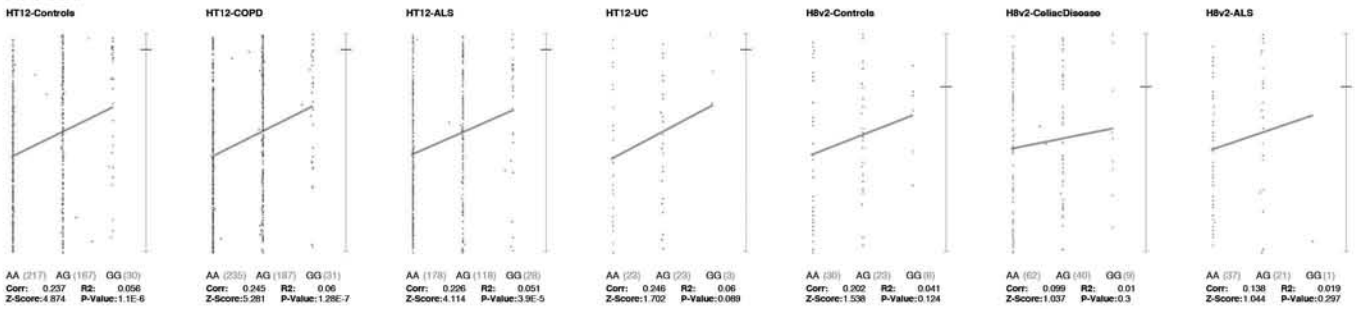

SNP rs7778054 (chr. 6, 135466009 bp)  
Probe 3130220 (chr. 3, 45240621 - 45243623 bp), AC010170.3  
P-Value 9.07E-18

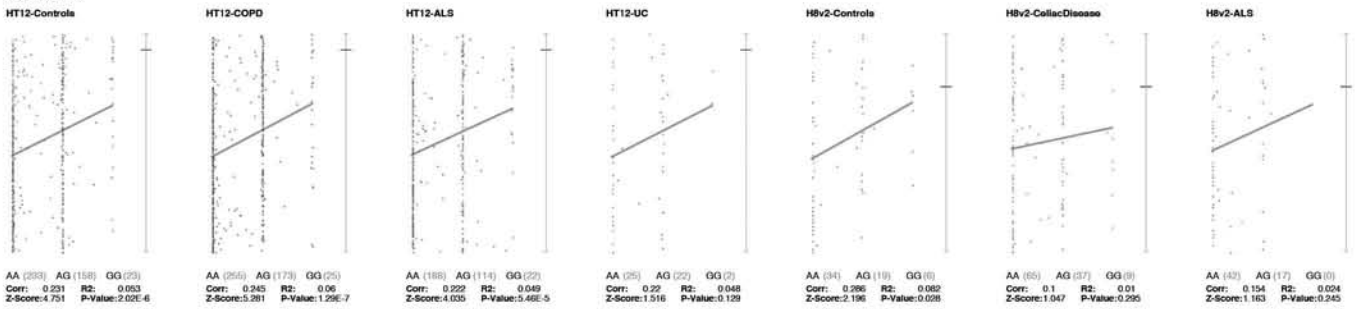

SNP rs9309137 (chr. 6, 135460711 bp)  
Probe 3130220 (chr. 3, 45240621 - 45243623 bp), AC010170.3  
P-Value 8.94E-18

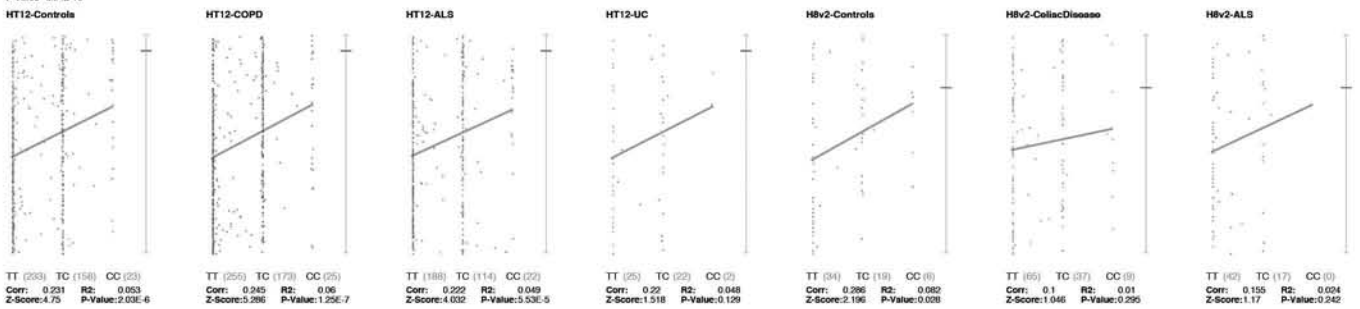

SNP rs2540917 (chr. 2, 8046263 bp)  
Probe 450537 (chr. 11, 5229896 - 5429091 bp), HBG2/HENST00000399563  
P-Value 7.04E-18

HT12-Controls

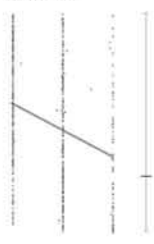

TT (170) TC (191) CC (93)  
Corr: -0.292 R2: 0.085  
Z-Score: 6.058 P-Value: 1.37E-9

HT12-COPD

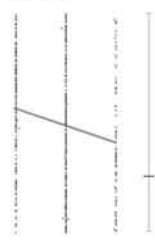

TT (151) TC (222) CC (80)  
Corr: -0.188 R2: 0.035  
Z-Score: 4.03 P-Value: 5.17E-5

HT12-ALS

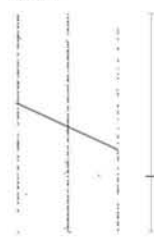

TT (110) TC (157) CC (57)  
Corr: -0.256 R2: 0.065  
Z-Score: 4.662 P-Value: 3.14E-6

HT12-UC

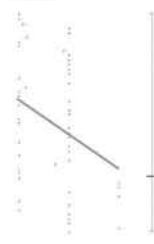

TT (20) TC (25) CC (4)  
Corr: 0.327 R2: 0.107  
Z-Score: 2.292 P-Value: 0.022

HbV2-Controls

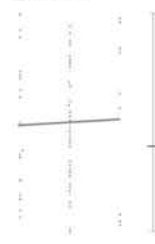

TT (17) TC (93) CC (8)  
Corr: 0.034 R2: 0.001  
Z-Score: 0.259 P-Value: 0.795

HbV2-ColicDisease

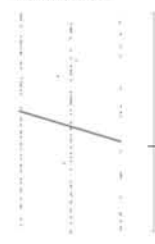

TT (45) TC (48) CC (18)  
Corr: -0.169 R2: 0.029  
Z-Score: 1.772 P-Value: 0.076

HbV2-ALS

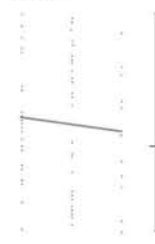

TT (22) TC (20) CC (11)  
Corr: -0.077 R2: 0.006  
Z-Score: 0.577 P-Value: 0.564

SNP rs12718587 (chr. 7, 5038922 bp)  
Probe 3290396 (chr. 11, 64452638 - 64460229 bp), PPP2FDL/IGPH/2  
P-Value 6.67E-18

HT12-Controls

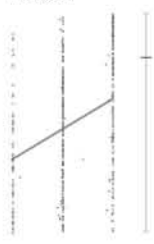

AA (94) AC (197) CC (153)  
Corr: 0.327 R2: 0.107  
Z-Score: 6.827 P-Value: 8.7E-12

HT12-COPD

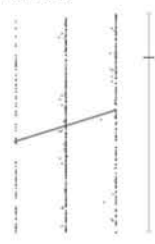

AA (68) AC (220) CC (159)  
Corr: 0.196 R2: 0.028  
Z-Score: 3.557 P-Value: 3.79E-4

HT12-ALS

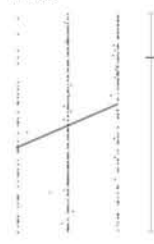

AA (56) AC (163) CC (108)  
Corr: 0.23 R2: 0.053  
Z-Score: 4.183 P-Value: 2.88E-5

HT12-UC

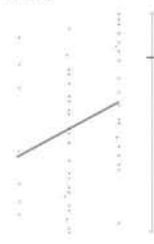

AA (7) AC (20) CC (19)  
Corr: 0.287 R2: 0.082  
Z-Score: 1.997 P-Value: 0.048

HbV2-Controls  
eQTL not available  
Probe not present.

HbV2-ColicDisease  
eQTL not available  
Probe not present.

HbV2-ALS  
eQTL not available  
Probe not present.

SNP rs12485738 (chr. 3, 56840616 bp)  
Probe 5060090 (chr. 17, 45542679 - 45563176 bp), SAMD14  
P-Value 3.74E-18

HT12-Controls

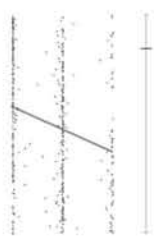

GG (153) GA (194) AA (67)  
Corr: -0.248 R2: 0.061  
Z-Score: 5.109 P-Value: 3.25E-7

HT12-COPD

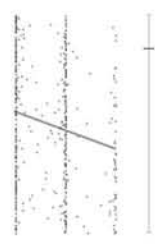

GG (202) GA (200) AA (51)  
Corr: -0.187 R2: 0.035  
Z-Score: 4.009 P-Value: 6.1E-5

HT12-ALS

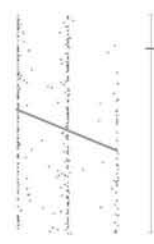

GG (132) GA (148) AA (44)  
Corr: -0.213 R2: 0.045  
Z-Score: 3.886 P-Value: 1.11E-4

HT12-UC

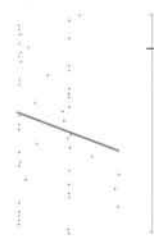

GG (24) GA (22) AA (3)  
Corr: -0.174 R2: 0.03  
Z-Score: 1.195 P-Value: 0.232

HbV2-Controls

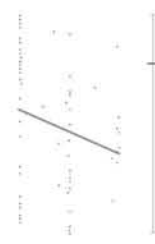

GG (28) GA (21) AA (10)  
Corr: -0.242 R2: 0.059  
Z-Score: 1.849 P-Value: 0.064

HbV2-ColicDisease

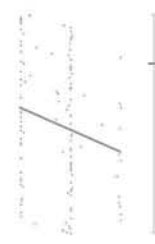

GG (41) GA (57) AA (13)  
Corr: -0.218 R2: 0.048  
Z-Score: 2.303 P-Value: 0.021

HbV2-ALS

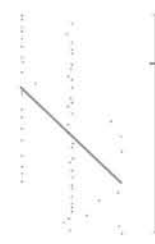

GG (20) GA (32) AA (7)  
Corr: -0.449 R2: 0.202  
Z-Score: 3.567 P-Value: 3.61E-4

SNP rs2517713 (chr. 6, 30092078 bp)  
Probe 500687 (chr. 2, 20993000 - 206733432 bp), NDUFS1  
P-Value 2.79E-18

HT12-Controls

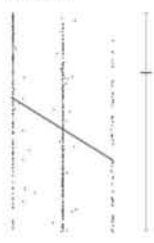

TT (154) TG (205) GG (58)  
Corr: -0.331 R2: 0.11  
Z-Score: 6.91 P-Value: 4.83E-12

HT12-COPD

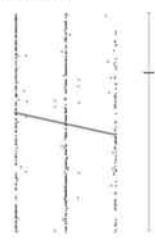

TT (182) TG (209) GG (82)  
Corr: -0.122 R2: 0.015  
Z-Score: 2.601 P-Value: 0.009

HT12-ALS

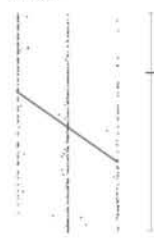

TT (98) TG (170) GG (56)  
Corr: -0.373 R2: 0.139  
Z-Score: 6.938 P-Value: 3.96E-12

HT12-UC

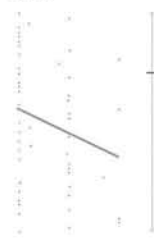

TT (27) TG (17) GG (5)  
Corr: -0.241 R2: 0.058  
Z-Score: 1.67 P-Value: 0.095

HbV2-Controls

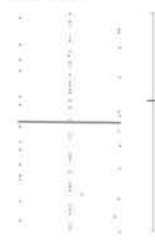

TT (14) TG (32) GG (13)  
Corr: -0.005 R2: 0  
Z-Score: 0.035 P-Value: 0.972

HbV2-ColicDisease

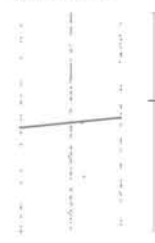

TT (20) TG (82) GG (26)  
Corr: 0.05 R2: 0.002  
Z-Score: 0.518 P-Value: 0.605

HbV2-ALS

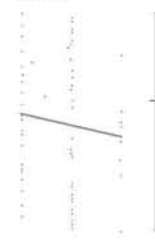

TT (23) TG (28) GG (8)  
Corr: -0.119 R2: 0.014  
Z-Score: 0.9 P-Value: 0.368

SNP rs12485738 (chr. 3, 56840616 bp)  
Probe 720044 (chr. 6, 80404595 - 8053978 bp), SH3BGRL2/Colic/152  
P-Value 2.38E-18

HT12-Controls

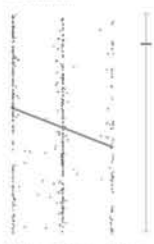

GG (153) GA (194) AA (67)  
Corr: -0.211 R2: 0.044  
Z-Score: 4.321 P-Value: 1.56E-5

HT12-COPD

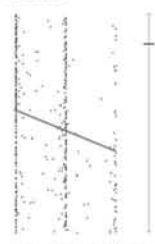

GG (202) GA (200) AA (51)  
Corr: -0.214 R2: 0.046  
Z-Score: 4.595 P-Value: 4.33E-6

HT12-ALS

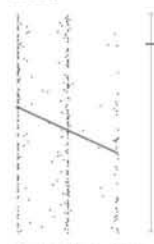

GG (132) GA (148) AA (44)  
Corr: -0.238 R2: 0.056  
Z-Score: 4.322 P-Value: 1.55E-5

HT12-UC

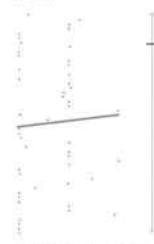

GG (24) GA (22) AA (3)  
Corr: 0.054 R2: 0.003  
Z-Score: 0.366 P-Value: 0.715

HbV2-Controls

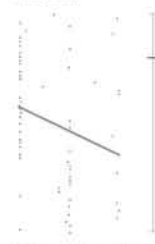

GG (28) GA (21) AA (10)  
Corr: -0.282 R2: 0.069  
Z-Score: 2.007 P-Value: 0.045

HbV2-ColicDisease

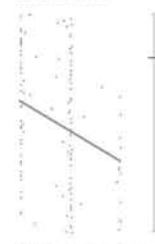

GG (41) GA (57) AA (13)  
Corr: -0.294 R2: 0.087  
Z-Score: 3.136 P-Value: 0.002

HbV2-ALS

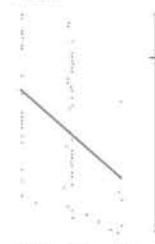

GG (20) GA (32) AA (7)  
Corr: -0.417 R2: 0.174  
Z-Score: 3.282 P-Value: 0.001

SNP rs9483786 (chr. 6, 135477194 bp)  
 Probe 4010040 (chr. 11, 5229996 - 5425091 bp), HBG2@ENST0000039563  
 P-Value 1.49E-18

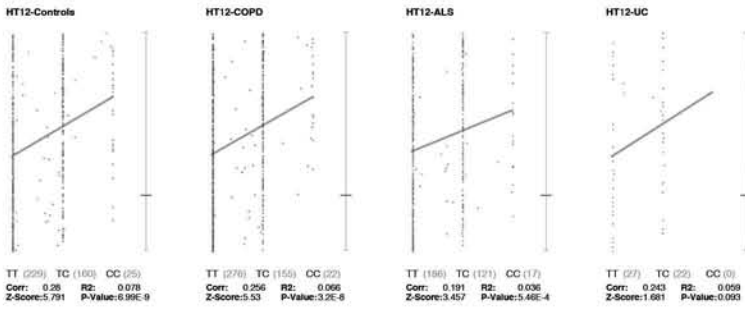

HBv2-Controls  
 eQTL not available  
 Probe not present.

HBv2-ColicDisease  
 eQTL not available  
 Probe not present.

HBv2-ALS  
 eQTL not available  
 Probe not present.

SNP rs12485738 (chr. 3, 56840816 bp)  
 Probe 3500630 (chr. 15, 81314970 - 81314970 bp), --  
 P-Value 1.19E-18

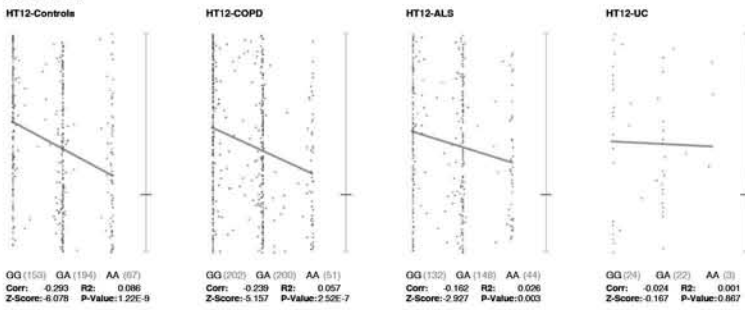

HBv2-Controls  
 eQTL not available  
 Probe not present.

HBv2-ColicDisease  
 eQTL not available  
 Probe not present.

HBv2-ALS  
 eQTL not available  
 Probe not present.

SNP rs2540917 (chr. 2, 80462933 bp)  
 Probe 4010040 (chr. 11, 5229996 - 5425091 bp), HBG2@ENST0000039563  
 P-Value 1.17E-18

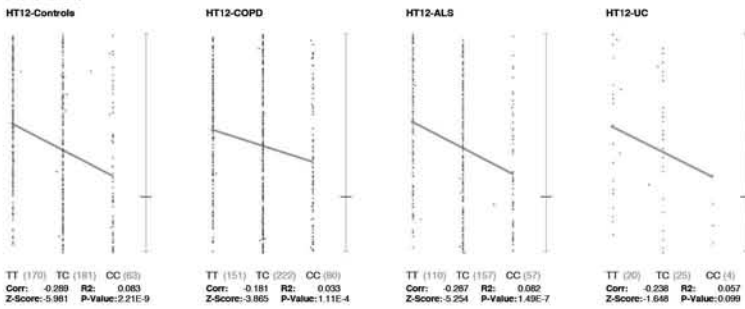

HBv2-Controls  
 eQTL not available  
 Probe not present.

HBv2-ColicDisease  
 eQTL not available  
 Probe not present.

HBv2-ALS  
 eQTL not available  
 Probe not present.

SNP rs2517713 (chr. 6, 30092078 bp)  
 Probe 5080577 (chr. 20, 6195831 - 6194332 bp), TP05212  
 P-Value 2.03E-19

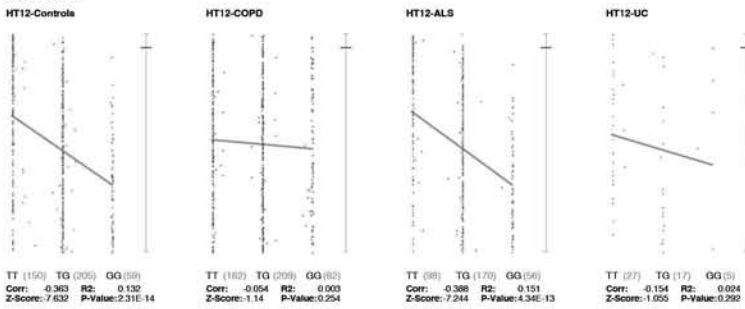

HBv2-Controls  
 eQTL not available  
 Probe not present.

HBv2-ColicDisease  
 eQTL not available  
 Probe not present.

HBv2-ALS  
 eQTL not available  
 Probe not present.

SNP rs4903126 (chr. 11, 579564 bp)  
 Probe 7650681 (chr. 1, 14015013 - 1402280 bp), PRDM2  
 P-Value 2.25E-20

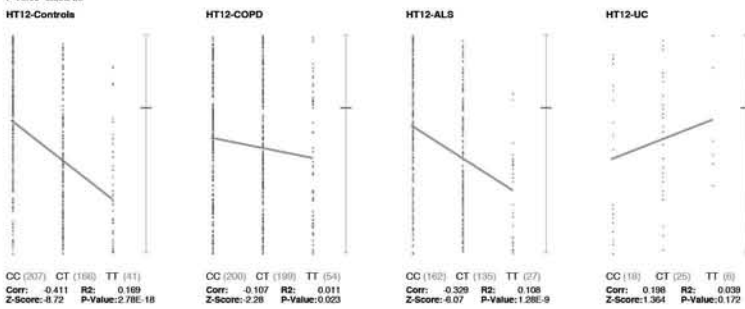

HBv2-Controls  
 eQTL not available  
 Probe not present.

HBv2-ColicDisease  
 eQTL not available  
 Probe not present.

HBv2-ALS  
 eQTL not available  
 Probe not present.

SNP rs2523393 (chr. 6, 29813638 bp)  
Probe 5000577 (chr. 20, 61958531 - 61994332 bp), TPD52L2  
P-Value 6.89E-21

HT12-Controls

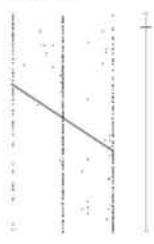

GG (72) GA (190) AA (140)  
Corr: -0.362 R2: 0.131  
Z-Score: 7.61 P-Value: 2.74E-14

HT12-COPD

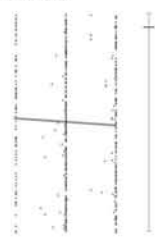

GG (75) GA (221) AA (157)  
Corr: -0.039 R2: 0.002  
Z-Score: 0.827 P-Value: 0.408

HT12-ALS

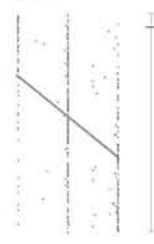

GG (50) GA (158) AA (113)  
Corr: -0.434 R2: 0.186  
Z-Score: 6.192 P-Value: 2.57E-16

HT12-UC

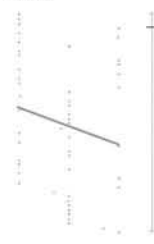

GG (18) GA (20) AA (11)  
Corr: 0.215 R2: 0.046  
Z-Score: 1.467 P-Value: 0.137

HBv2-Controls

eQTL not available  
Probe not present.

HBv2-ColiacDisease

eQTL not available  
Probe not present.

HBv2-ALS

eQTL not available  
Probe not present.

SNP rs2523393 (chr. 6, 29813638 bp)  
Probe 5000576 (chr. 4, 55217852 - 55302636 bp), KIT  
P-Value 4.99E-22

HT12-Controls

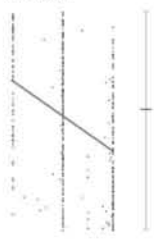

GG (72) GA (190) AA (140)  
Corr: -0.384 R2: 0.148  
Z-Score: 8.109 P-Value: 1.2E-16

HT12-COPD

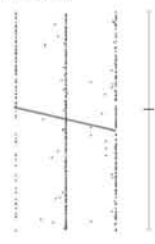

GG (75) GA (221) AA (157)  
Corr: -0.13 R2: 0.017  
Z-Score: 2.776 P-Value: 0.005

HT12-ALS

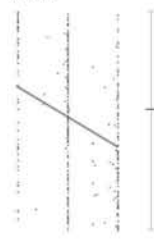

GG (50) GA (158) AA (113)  
Corr: -0.32 R2: 0.102  
Z-Score: 5.886 P-Value: 3.95E-9

HT12-UC

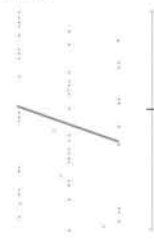

GG (18) GA (20) AA (11)  
Corr: 0.204 R2: 0.042  
Z-Score: 1.606 P-Value: 0.16

HBv2-Controls

eQTL not available  
Probe not present.

HBv2-ColiacDisease

eQTL not available  
Probe not present.

HBv2-ALS

eQTL not available  
Probe not present.

SNP rs2517713 (chr. 6, 30026078 bp)  
Probe 5000576 (chr. 4, 55217852 - 55302636 bp), KIT  
P-Value 2.63E-22

HT12-Controls

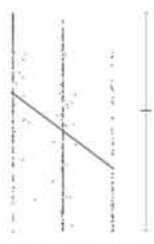

TT (150) TG (205) GG (59)  
Corr: -0.402 R2: 0.162  
Z-Score: 8.525 P-Value: 1.53E-17

HT12-COPD

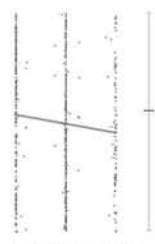

TT (162) TG (209) GG (82)  
Corr: -0.1 R2: 0.01  
Z-Score: 2.131 P-Value: 0.033

HT12-ALS

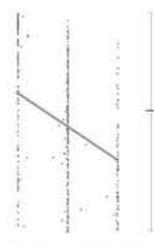

TT (96) TG (170) GG (56)  
Corr: -0.355 R2: 0.126  
Z-Score: 6.587 P-Value: 4.5E-11

HT12-UC

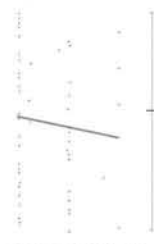

TT (27) TG (17) GG (5)  
Corr: -0.105 R2: 0.011  
Z-Score: 0.72 P-Value: 0.472

HBv2-Controls

eQTL not available  
Probe not present.

HBv2-ColiacDisease

eQTL not available  
Probe not present.

HBv2-ALS

eQTL not available  
Probe not present.

SNP rs9483788 (chr. 6, 135477194 bp)  
Probe 450537 (chr. 11, 5299996 - 5429091 bp), HBIG2/ENST00000299563  
P-Value 1.36E-22

HT12-Controls

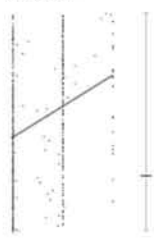

TT (229) TC (180) CC (25)  
Corr: 0.293 R2: 0.086  
Z-Score: 6.078 P-Value: 1.22E-9

HT12-COPD

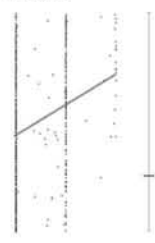

TT (276) TC (155) CC (22)  
Corr: 0.275 R2: 0.075  
Z-Score: 5.945 P-Value: 2.76E-9

HT12-ALS

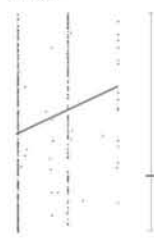

TT (186) TC (121) CC (17)  
Corr: 0.218 R2: 0.048  
Z-Score: 3.957 P-Value: 7.58E-5

HT12-UC

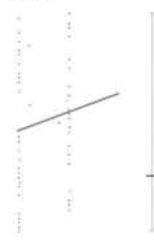

TT (27) TC (22) CC (8)  
Corr: 0.142 R2: 0.02  
Z-Score: 0.972 P-Value: 0.331

HBv2-Controls

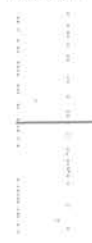

TT (32) TC (25) CC (2)  
Corr: 0.003 R2: 0  
Z-Score: 0.025 P-Value: 0.98

HBv2-ColiacDisease

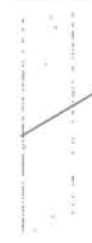

TT (85) TC (39) CC (7)  
Corr: 0.276 R2: 0.076  
Z-Score: 2.934 P-Value: 0.003

HBv2-ALS

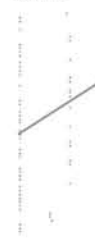

TT (38) TC (19) CC (2)  
Corr: 0.263 R2: 0.069  
Z-Score: 2.016 P-Value: 0.044

SNP rs1427407 (chr. 2, 60571547 bp)  
Probe 3440630 (chr. 1, 6424616 - 6447223 bp), ESPN/TNFRSF25  
P-Value 2.91E-23

HT12-Controls

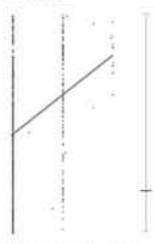

GG (301) GT (101) TT (12)  
Corr: 0.321 R2: 0.103  
Z-Score: 6.69 P-Value: 2.23E-11

HT12-COPD

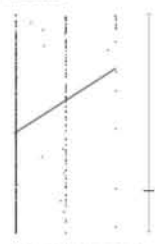

GG (336) GT (102) TT (15)  
Corr: 0.26 R2: 0.067  
Z-Score: 5.605 P-Value: 2.08E-8

HT12-ALS

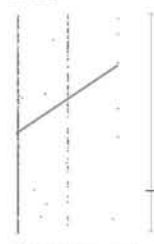

GG (234) GT (84) TT (8)  
Corr: 0.261 R2: 0.068  
Z-Score: 4.757 P-Value: 1.96E-6

HT12-UC

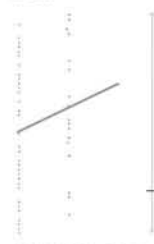

GG (32) GT (17) TT (8)  
Corr: 0.177 R2: 0.031  
Z-Score: 1.217 P-Value: 0.224

HBv2-Controls

eQTL not available  
Probe not present.

HBv2-ColiacDisease

eQTL not available  
Probe not present.

HBv2-ALS

eQTL not available  
Probe not present.

SNP rs60895 (chr. 6, 32693358 bp)  
Probe 2940424 (chr. 7, 36518133 - 36731593 bp), AOH1  
P-Value 1.07E-23

HT12-Controls

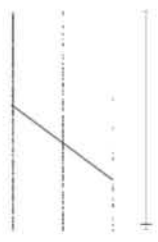

AA (256) AG (143) GG (15)  
Corr: -0.329 R2: 0.106  
Z-Score: -6.887 P-Value: 6.57E-12

HT12-COPD

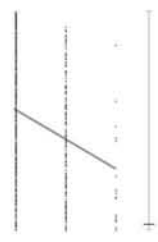

AA (293) AG (143) GG (17)  
Corr: -0.26 R2: 0.068  
Z-Score: -5.818 P-Value: 1.93E-8

HT12-ALS

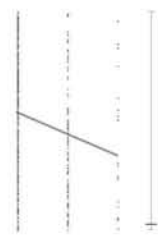

AA (218) AG (88) GG (18)  
Corr: -0.199 R2: 0.04  
Z-Score: -3.601 P-Value: 3.17E-4

HT12-UC

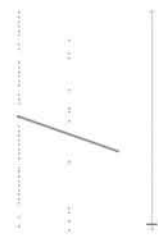

AA (37) AG (12) GG (0)  
Corr: -0.117 R2: 0.014  
Z-Score: -0.804 P-Value: 0.422

HBv2-Controls

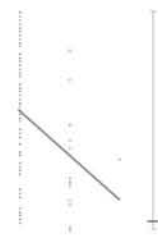

AA (40) AG (12) GG (1)  
Corr: -0.324 R2: 0.105  
Z-Score: -2.555 P-Value: 0.012

HBv2-ColiacDisease

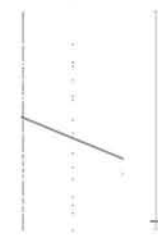

AA (94) AG (15) GG (2)  
Corr: -0.135 R2: 0.018  
Z-Score: -1.409 P-Value: 0.159

HBv2-ALS

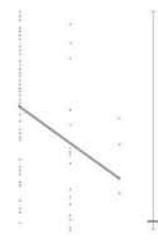

AA (39) AG (16) GG (4)  
Corr: -0.349 R2: 0.121  
Z-Score: -2.705 P-Value: 0.007

SNP rs1245738 (chr. 3, 56840816 bp)  
Probe 1820396 (chr. 22, 42725424 - 42897434 bp), PARV1  
P-Value 8.02E-24

HT12-Controls

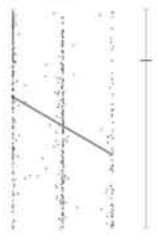

GG (153) GA (194) AA (67)  
Corr: -0.317 R2: 0.1  
Z-Score: -6.599 P-Value: 1.13E-11

HT12-COPD

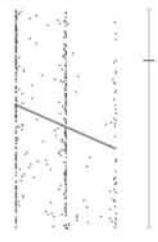

GG (200) GA (200) AA (51)  
Corr: -0.225 R2: 0.051  
Z-Score: -4.839 P-Value: 1.31E-6

HT12-ALS

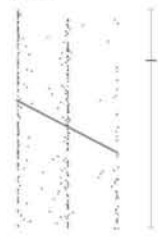

GG (132) GA (148) AA (44)  
Corr: -0.272 R2: 0.074  
Z-Score: -4.972 P-Value: 6.63E-7

HT12-UC

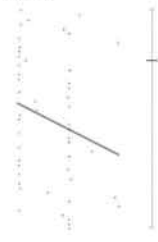

GG (24) GA (22) AA (3)  
Corr: -0.236 R2: 0.056  
Z-Score: -1.631 P-Value: 0.103

HBv2-Controls

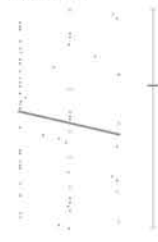

GG (88) GA (21) AA (10)  
Corr: -0.129 R2: 0.017  
Z-Score: -0.975 P-Value: 0.329

HBv2-ColiacDisease

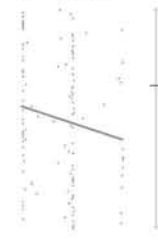

GG (41) GA (57) AA (10)  
Corr: -0.163 R2: 0.027  
Z-Score: -1.708 P-Value: 0.086

HBv2-ALS

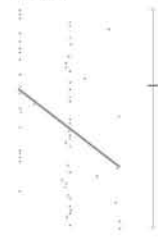

GG (20) GA (32) AA (7)  
Corr: -0.368 R2: 0.136  
Z-Score: -2.872 P-Value: 0.004

SNP rs786432 (chr. 2, 60573474 bp)  
Probe 3440630 (chr. 1, 6424816 - 6447223 bp), ESPW/ITN/HSF25  
P-Value 2.97E-24

HT12-Controls

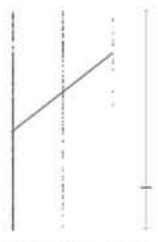

AA (301) AC (102) CC (11)  
Corr: 0.317 R2: 0.101  
Z-Score: 6.611 P-Value: 3.81E-11

HT12-COPD

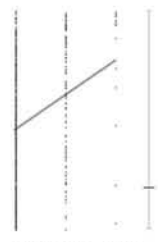

AA (342) AC (87) CC (14)  
Corr: 0.28 R2: 0.078  
Z-Score: 6.068 P-Value: 1.3E-9

HT12-ALS

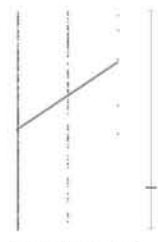

AA (295) AC (84) CC (5)  
Corr: 0.259 R2: 0.067  
Z-Score: 4.732 P-Value: 2.22E-6

HT12-UC

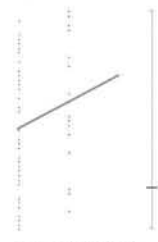

AA (33) AC (16) CC (0)  
Corr: 0.194 R2: 0.038  
Z-Score: 1.335 P-Value: 0.182

HBv2-Controls

eQTL not available  
Probe not present.

HBv2-ColiacDisease

eQTL not available  
Probe not present.

HBv2-ALS

eQTL not available  
Probe not present.

SNP rs2523293 (chr. 6, 29813638 bp)  
Probe 5000687 (chr. 2, 206936000 - 206733432 bp), NDUFS1  
P-Value 1.87E-25

HT12-Controls

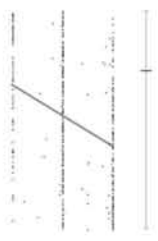

GG (72) GA (190) AA (140)  
Corr: -0.339 R2: 0.115  
Z-Score: -7.078 P-Value: 1.46E-12

HT12-COPD

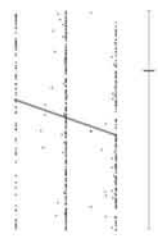

GG (75) GA (221) AA (167)  
Corr: -0.189 R2: 0.036  
Z-Score: -4.046 P-Value: 5.21E-5

HT12-ALS

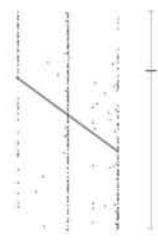

GG (53) GA (158) AA (113)  
Corr: -0.395 R2: 0.156  
Z-Score: -7.367 P-Value: 1.5E-13

HT12-UC

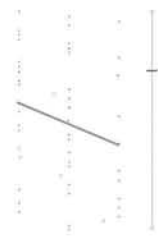

GG (18) GA (20) AA (11)  
Corr: -0.241 R2: 0.058  
Z-Score: -1.669 P-Value: 0.095

HBv2-Controls

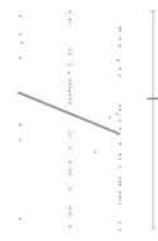

GG (7) GA (25) AA (27)  
Corr: -0.213 R2: 0.045  
Z-Score: -1.621 P-Value: 0.105

HBv2-ColiacDisease

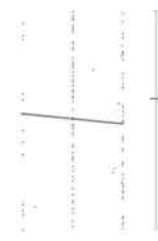

GG (14) GA (54) AA (83)  
Corr: -0.05 R2: 0.003  
Z-Score: -0.523 P-Value: 0.601

HBv2-ALS

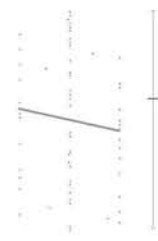

GG (12) GA (32) AA (15)  
Corr: -0.116 R2: 0.014  
Z-Score: -0.877 P-Value: 0.38

SNP rs7778054 (chr. 6, 135460009 bp)  
Probe 4010040 (chr. 11, 5229996 - 5455091 bp), HBG2/WENST00000399563  
P-Value 8.47E-27

HT12-Controls

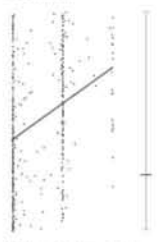

AA (233) AG (158) GG (23)  
Corr: 0.329 R2: 0.108  
Z-Score: 6.874 P-Value: 6.23E-12

HT12-COPD

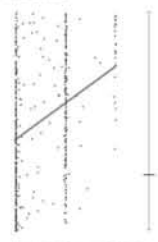

AA (255) AG (173) GG (25)  
Corr: 0.336 R2: 0.113  
Z-Score: 7.336 P-Value: 2.2E-13

HT12-ALS

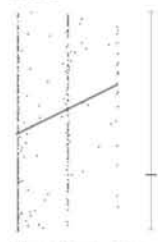

AA (188) AG (114) GG (22)  
Corr: 0.238 R2: 0.057  
Z-Score: 4.326 P-Value: 1.52E-5

HT12-UC

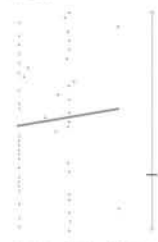

AA (25) AG (22) GG (2)  
Corr: 0.071 R2: 0.005  
Z-Score: 0.484 P-Value: 0.628

HBv2-Controls

eQTL not available  
Probe not present.

HBv2-ColiacDisease

eQTL not available  
Probe not present.

HBv2-ALS

eQTL not available  
Probe not present.



SNP rs9398137 (chr. 6, 135460711 bp)  
Probe 4010040 (chr. 11, 5229996 - 5429091 bp), HBG2/ENST00000399563  
P-Value 7.38E-27

HT12-Controls

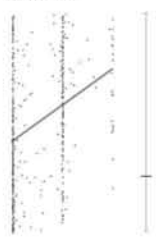

TT (233) TC (158) CC (23)  
Corr: 0.33 R2: 0.109  
Z-Score:6.878 P-Value:6.07E-12

HT12-COPD

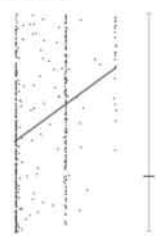

TT (250) TC (173) CC (20)  
Corr: 0.336 R2: 0.113  
Z-Score:7.343 P-Value:2.09E-13

HT12-ALS

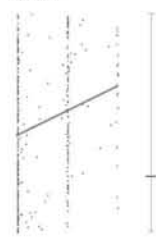

TT (188) TC (114) CC (22)  
Corr: 0.236 R2: 0.057  
Z-Score:4.328 P-Value:1.51E-5

HT12-UC

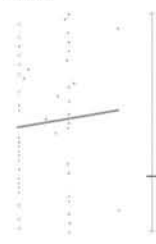

TT (26) TC (22) CC (2)  
Corr: 0.071 R2: 0.005  
Z-Score:0.484 P-Value:0.629

HBv2-Controls

eQTL not available  
Probe not present.

HBv2-ColicDisaaso

eQTL not available  
Probe not present.

HBv2-ALS

eQTL not available  
Probe not present.

SNP rs1427407 (chr. 2, 60571547 bp)  
Probe 4010040 (chr. 11, 5229996 - 5429091 bp), HBG2/ENST00000399563  
P-Value 2.26E-26

HT12-Controls

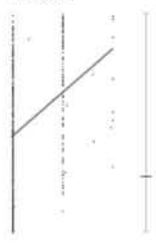

GG (901) GT (101) TT (12)  
Corr: 0.353 R2: 0.125  
Z-Score:7.403 P-Value:1.26E-13

HT12-COPD

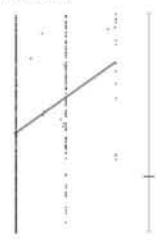

GG (330) GT (102) TT (15)  
Corr: 0.269 R2: 0.084  
Z-Score:6.272 P-Value:3.56E-10

HT12-ALS

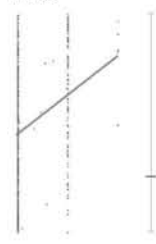

GG (234) GT (84) TT (6)  
Corr: 0.303 R2: 0.092  
Z-Score:5.566 P-Value:2.6E-8

HT12-UC

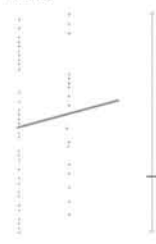

GG (32) GT (17) TT (0)  
Corr: 0.102 R2: 0.01  
Z-Score:0.694 P-Value:0.488

HBv2-Controls

eQTL not available  
Probe not present.

HBv2-ColicDisaaso

eQTL not available  
Probe not present.

HBv2-ALS

eQTL not available  
Probe not present.

SNP rs765432 (chr. 2, 60573474 bp)  
Probe 4010040 (chr. 11, 5229996 - 5429091 bp), HBG2/ENST00000399563  
P-Value 4.88E-29

HT12-Controls

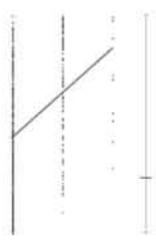

AA (301) AC (102) CC (11)  
Corr: 0.363 R2: 0.132  
Z-Score:7.62 P-Value:2.53E-14

HT12-COPD

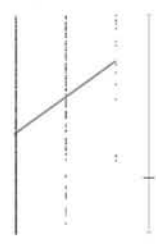

AA (342) AC (97) CC (14)  
Corr: 0.293 R2: 0.086  
Z-Score:6.359 P-Value:2.03E-10

HT12-ALS

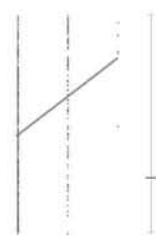

AA (295) AC (84) CC (5)  
Corr: 0.296 R2: 0.087  
Z-Score:5.423 P-Value:5.86E-8

HT12-UC

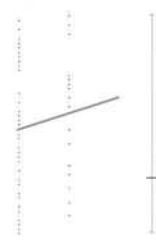

AA (33) AC (16) CC (0)  
Corr: 0.117 R2: 0.014  
Z-Score:0.8 P-Value:0.424

HBv2-Controls

eQTL not available  
Probe not present.

HBv2-ColicDisaaso

eQTL not available  
Probe not present.

HBv2-ALS

eQTL not available  
Probe not present.

SNP rs2292239 (chr. 12, 54768447 bp)  
Probe 5890707 (chr. 4, 17410376 - 1742479 bp), AC110758.2  
P-Value 1.89E-29

HT12-Controls

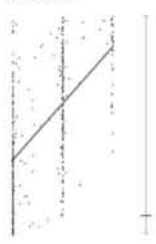

GG (196) GT (180) TT (38)  
Corr: 0.566 R2: 0.32  
Z-Score:12.608 P-Value:1.91E-36

HT12-COPD

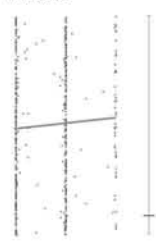

GG (198) GT (206) TT (40)  
Corr: 0.059 R2: 0.003  
Z-Score:1.248 P-Value:0.212

HT12-ALS

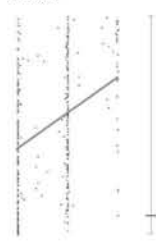

GG (144) GT (147) TT (33)  
Corr: 0.353 R2: 0.125  
Z-Score:6.546 P-Value:5.93E-11

HT12-UC

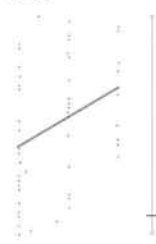

GG (23) GT (17) TT (9)  
Corr: 0.339 R2: 0.115  
Z-Score:2.384 P-Value:0.017

HBv2-Controls

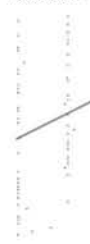

GG (30) GT (29) TT (3)  
Corr: 0.225 R2: 0.05  
Z-Score:1.711 P-Value:0.087

HBv2-ColicDisaaso

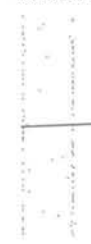

GG (44) GT (55) TT (12)  
Corr: 0.018 R2: 0  
Z-Score:0.186 P-Value:0.852

HBv2-ALS

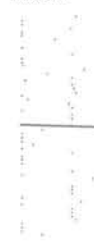

GG (28) GT (26) TT (5)  
Corr: -0.015 R2: 0  
Z-Score:-0.113 P-Value:0.91

SNP rs1701704 (chr. 12, 54608754 bp)  
Probe 5890707 (chr. 4, 17410376 - 1742479 bp), AC110758.2  
P-Value 1.68E-30

HT12-Controls

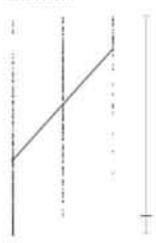

TT (193) TG (178) GG (40)  
Corr: 0.582 R2: 0.338  
Z-Score:13.038 P-Value:7.44E-30

HT12-COPD

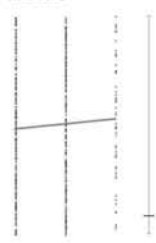

TT (196) TG (206) GG (51)  
Corr: 0.055 R2: 0.003  
Z-Score:1.164 P-Value:0.244

HT12-ALS

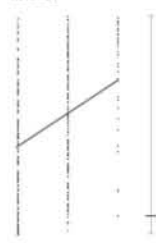

TT (145) TG (146) GG (33)  
Corr: 0.347 R2: 0.12  
Z-Score:6.423 P-Value:1.34E-10

HT12-UC

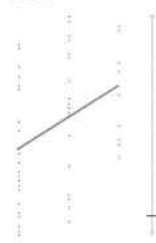

TT (22) TG (10) GG (0)  
Corr: 0.366 R2: 0.134  
Z-Score:2.584 P-Value:0.01

HBv2-Controls

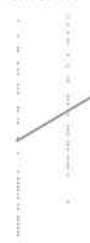

TT (31) TG (25) GG (0)  
Corr: 0.274 R2: 0.075  
Z-Score:2.096 P-Value:0.036

HBv2-ColicDisaaso

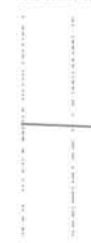

TT (44) TG (54) GG (13)  
Corr: -0.018 R2: 0  
Z-Score:-0.186 P-Value:0.852

HBv2-ALS

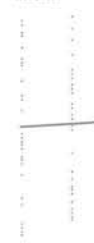

TT (27) TG (27) GG (5)  
Corr: 0.031 R2: 0.001  
Z-Score:0.236 P-Value:0.814

SNP rs778054 (chr. 6, 135460609 bp)  
 Probe 450537 (chr. 11, 5229996 - 5429091 bp), HBG2@WENST00000399563  
 P-Value 7.75E-31

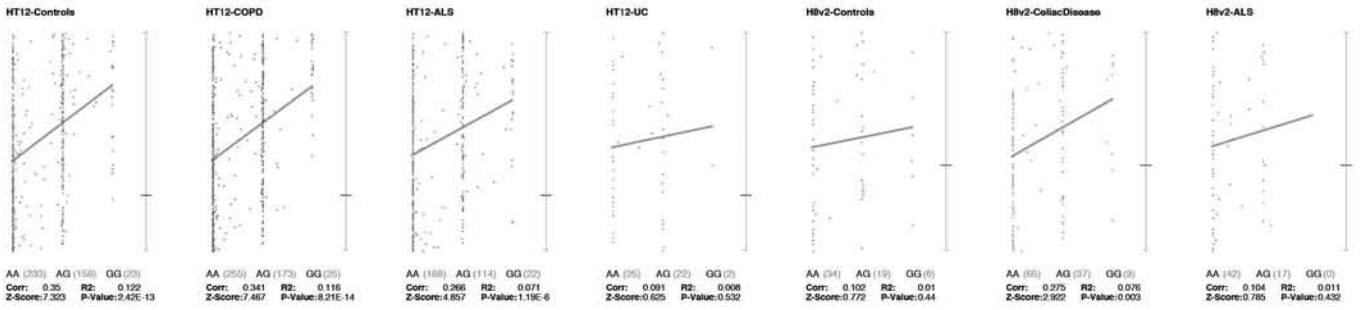

SNP rs939137 (chr. 6, 135460711 bp)  
 Probe 450537 (chr. 11, 5229996 - 5429091 bp), HBG2@WENST00000399563  
 P-Value 6.57E-31

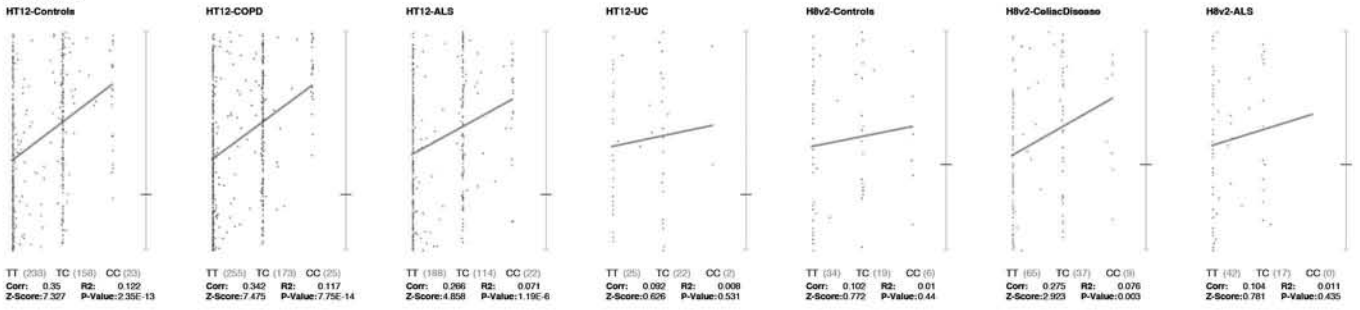

SNP rs12718597 (chr. 7, 50305922 bp)  
 Probe 4860181 (chr. 23, 48200866 - 48214509 bp), SLC38A5  
 P-Value 3.88E-31

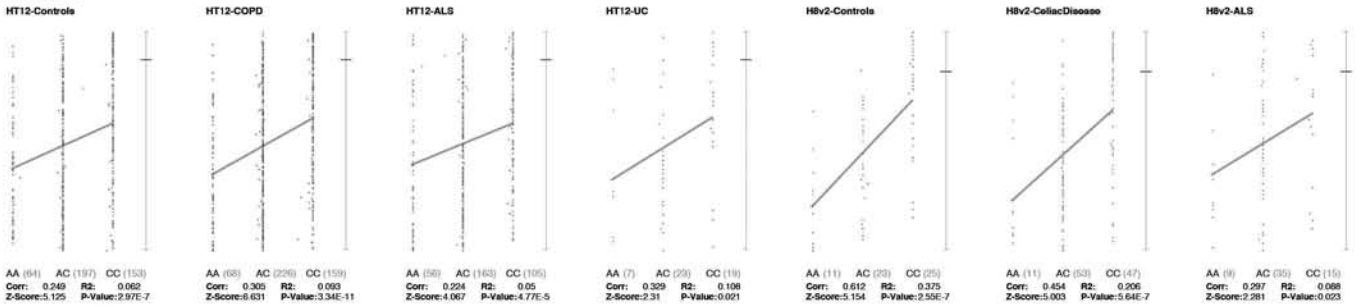

SNP rs9373124 (chr. 6, 135464902 bp)  
 Probe 4010040 (chr. 11, 5229996 - 5429091 bp), HBG2@WENST00000399563  
 P-Value 1.62E-31

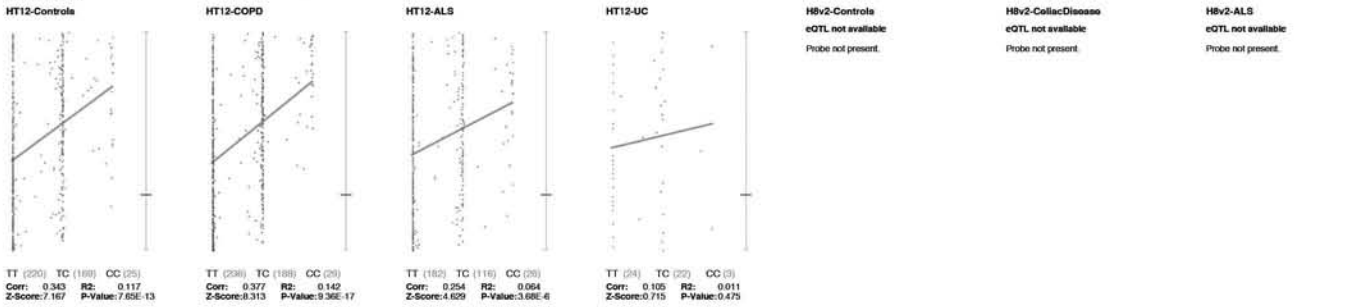

SNP rs8420266 (chr. 6, 135465510 bp)  
 Probe 4010040 (chr. 11, 5229996 - 5429091 bp), HBG2@WENST00000399563  
 P-Value 7.42E-32

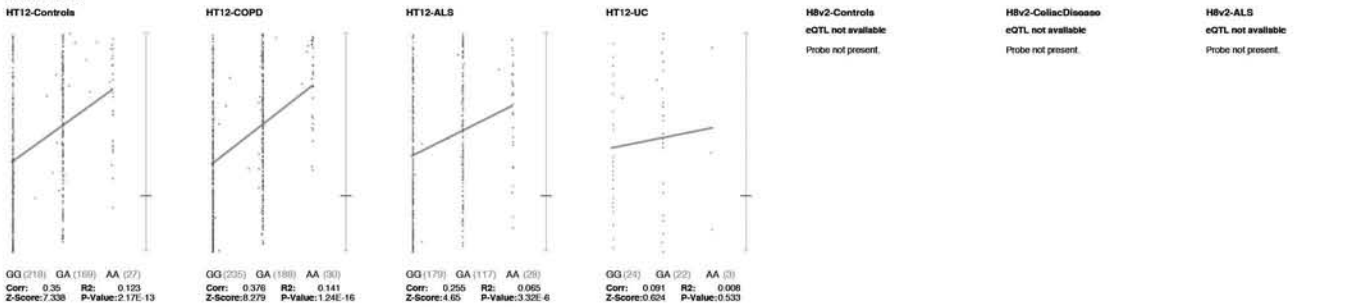

SNP rs495441 (chr. 6, 135468260 bp)  
Probe 4010040 (chr. 11, 5229996 - 5429091 bp), HBG2@ENST0000039563  
P-Value: 5.89E-33

HT12-Controls

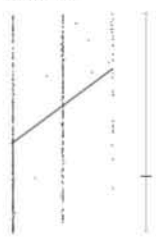

AA (217) AG (167) GG (30)  
Corr: 0.36 R2: 0.13  
Z-Score:7.568 P-Value:3.8E-14

HT12-COPD

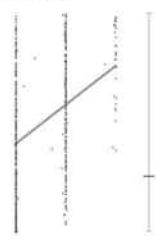

AA (235) AG (187) GG (31)  
Corr: 0.379 R2: 0.144  
Z-Score:8.361 P-Value:6.29E-17

HT12-ALS

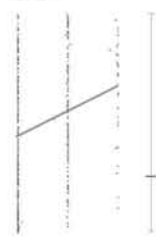

AA (178) AG (118) GG (28)  
Corr: 0.256 R2: 0.065  
Z-Score:4.665 P-Value:3.09E-6

HT12-UC

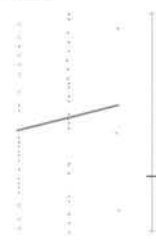

AA (22) AG (23) GG (3)  
Corr: 0.113 R2: 0.013  
Z-Score:0.774 P-Value:0.439

HBv2-Controls

eQTL not available  
Probe not present.

HBv2-ColicDisease

eQTL not available  
Probe not present.

HBv2-ALS

eQTL not available  
Probe not present.

SNP rs12718597 (chr. 7, 50359922 bp)  
Probe 1510612 (chr. 17, 4264027 - 42657044 bp), MYL4  
P-Value: 5.91E-33

HT12-Controls

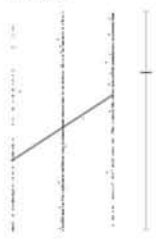

AA (94) AC (197) CC (153)  
Corr: 0.354 R2: 0.126  
Z-Score:7.434 P-Value:1.05E-13

HT12-COPD

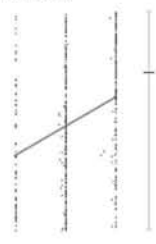

AA (68) AC (220) CC (159)  
Corr: 0.308 R2: 0.095  
Z-Score:6.693 P-Value:2.18E-11

HT12-ALS

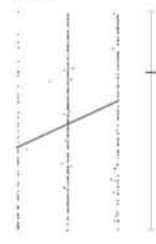

AA (56) AC (163) CC (108)  
Corr: 0.247 R2: 0.061  
Z-Score:4.487 P-Value:6.89E-6

HT12-UC

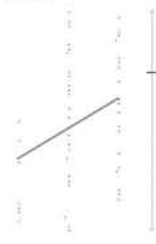

AA (7) AC (20) CC (19)  
Corr: 0.321 R2: 0.103  
Z-Score:2.251 P-Value:0.024

HBv2-Controls

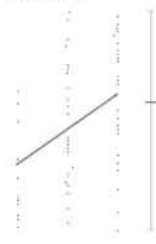

AA (11) AC (23) CC (25)  
Corr: 0.405 R2: 0.164  
Z-Score:3.18 P-Value:0.001

HBv2-ColicDisease

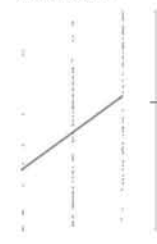

AA (11) AC (53) CC (17)  
Corr: 0.372 R2: 0.136  
Z-Score:4.018 P-Value:5.89E-5

HBv2-ALS

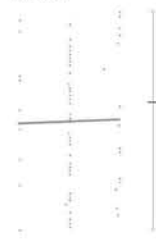

AA (9) AC (35) CC (15)  
Corr: 0.02 R2: 0  
Z-Score:0.148 P-Value:0.883

SNP rs9376992 (chr. 6, 135468337 bp)  
Probe 4010040 (chr. 11, 5229996 - 5429091 bp), HBG2@ENST0000039563  
P-Value: 4.53E-33

HT12-Controls

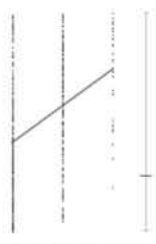

CC (218) CA (167) AA (31)  
Corr: 0.364 R2: 0.132  
Z-Score:7.646 P-Value:2.07E-14

HT12-COPD

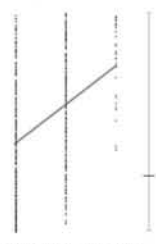

CC (233) CA (189) AA (31)  
Corr: 0.305 R2: 0.102  
Z-Score:6.295 P-Value:1.09E-16

HT12-ALS

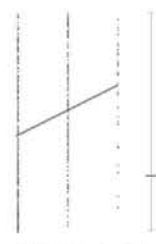

CC (178) CA (118) AA (26)  
Corr: 0.257 R2: 0.066  
Z-Score:4.692 P-Value:2.71E-6

HT12-UC

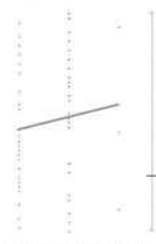

CC (22) CA (23) AA (3)  
Corr: 0.115 R2: 0.013  
Z-Score:0.786 P-Value:0.432

HBv2-Controls

eQTL not available  
Probe not present.

HBv2-ColicDisease

eQTL not available  
Probe not present.

HBv2-ALS

eQTL not available  
Probe not present.

SNP rs1427407 (chr. 2, 60571547 bp)  
Probe 450537 (chr. 11, 5229996 - 5429091 bp), HBG2@ENST0000039563  
P-Value: 2E-36

HT12-Controls

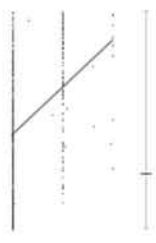

GG (301) GT (101) TT (13)  
Corr: 0.378 R2: 0.143  
Z-Score:7.966 P-Value:1.64E-15

HT12-COPD

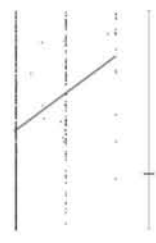

GG (338) GT (105) TT (15)  
Corr: 0.305 R2: 0.093  
Z-Score:6.642 P-Value:3.09E-11

HT12-ALS

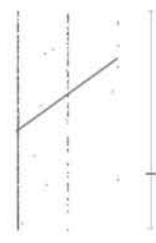

GG (204) GT (84) TT (6)  
Corr: 0.282 R2: 0.079  
Z-Score:5.158 P-Value:2.49E-7

HT12-UC

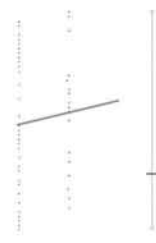

GG (32) GT (17) TT (6)  
Corr: 0.089 R2: 0.008  
Z-Score:0.605 P-Value:0.545

HBv2-Controls

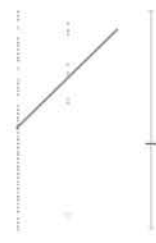

GG (50) GT (6) TT (6)  
Corr: 0.274 R2: 0.075  
Z-Score:2.103 P-Value:0.035

HBv2-ColicDisease

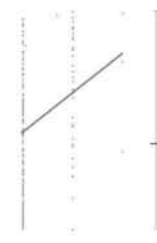

GG (78) GT (30) TT (3)  
Corr: 0.322 R2: 0.104  
Z-Score:3.445 P-Value:5.71E-4

HBv2-ALS

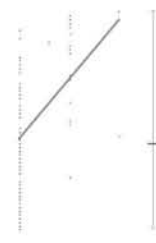

GG (42) GT (15) TT (2)  
Corr: 0.49 R2: 0.24  
Z-Score:3.941 P-Value:8.13E-5

SNP rs2305185 (chr. 5, 32541145 bp)  
Probe 2940424 (chr. 7, 36518135 - 36731995 bp), AOH1  
P-Value: 1.88E-36

HT12-Controls

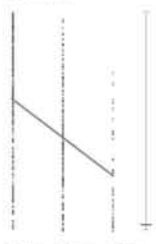

GG (209) GT (167) TT (38)  
Corr: -0.394 R2: 0.155  
Z-Score:8.332 P-Value:7.97E-17

HT12-COPD

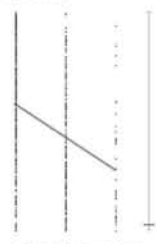

GG (245) GT (173) TT (35)  
Corr: -0.338 R2: 0.113  
Z-Score:7.337 P-Value:2.19E-13

HT12-ALS

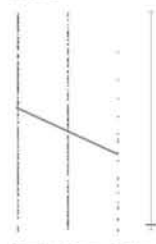

GG (158) GT (145) TT (21)  
Corr: -0.222 R2: 0.049  
Z-Score:4.035 P-Value:5.46E-5

HT12-UC

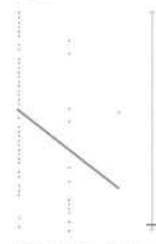

GG (36) GT (12) TT (1)  
Corr: -0.3 R2: 0.09  
Z-Score:2.097 P-Value:0.036

HBv2-Controls

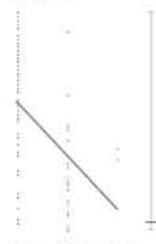

GG (40) GT (17) TT (2)  
Corr: -0.455 R2: 0.207  
Z-Score:3.618 P-Value:2.97E-4

HBv2-ColicDisease

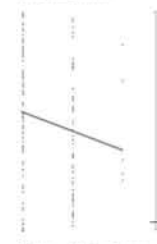

GG (61) GT (45) TT (5)  
Corr: -0.176 R2: 0.031  
Z-Score:1.842 P-Value:0.065

HBv2-ALS

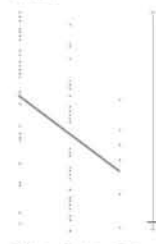

GG (25) GT (26) TT (6)  
Corr: -0.382 R2: 0.146  
Z-Score:2.982 P-Value:0.003

SNP rs766432 (chr. 2, 60573474 bp)  
 Probe 450537 (chr. 11, 5229996 - 5429091 bp), HUG2/ENST00000399563  
 P-Value: 3.49E-37

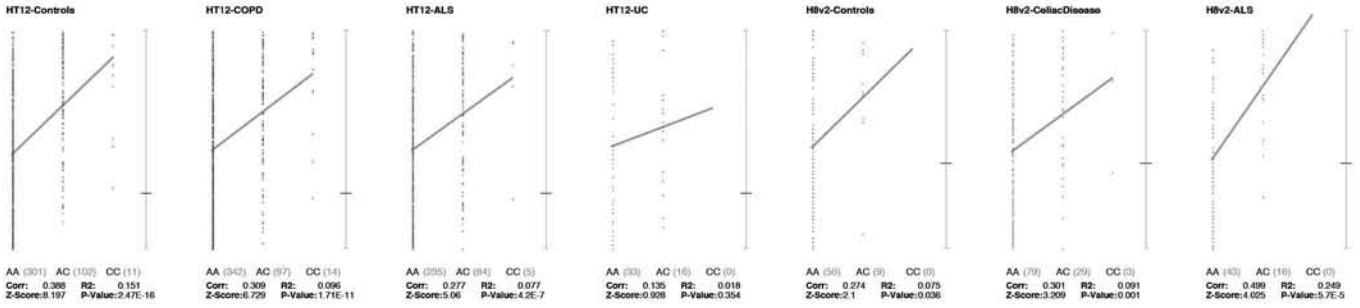

SNP rs9373124 (chr. 6, 135464902 bp)  
 Probe 450537 (chr. 11, 5229996 - 5429091 bp), HUG2/ENST00000399563  
 P-Value: 5.89E-38

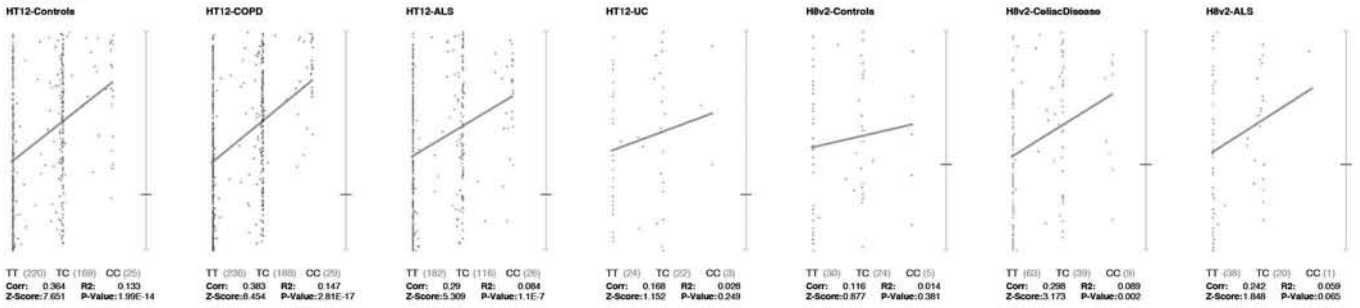

SNP rs9402696 (chr. 6, 135469510 bp)  
 Probe 450537 (chr. 11, 5229996 - 5429091 bp), HUG2/ENST00000399563  
 P-Value: 2.56E-38

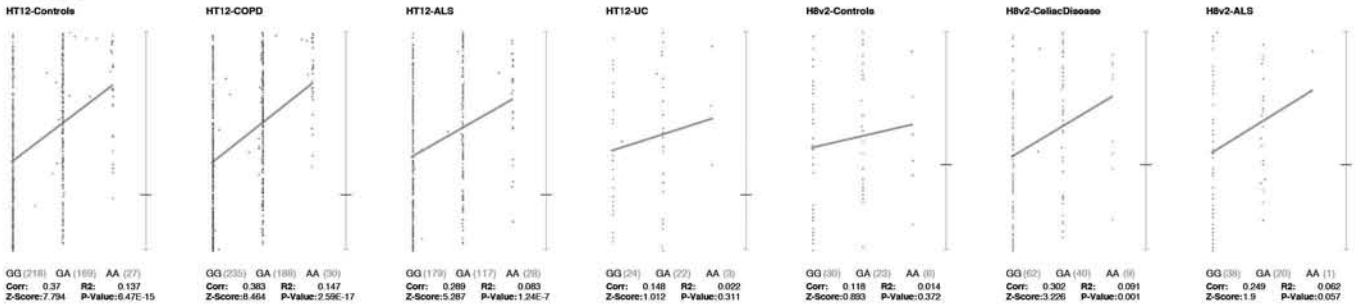

SNP rs2922239 (chr. 12, 54768447 bp)  
 Probe 5800554 (chr. 4, 41818859 - 41818859 bp), -  
 P-Value: 7.29E-39

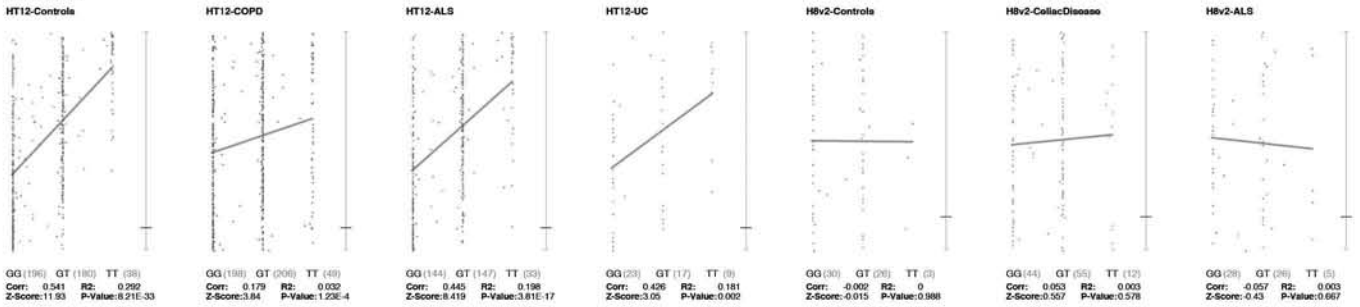

SNP rs1701704 (chr. 12, 54698754 bp)  
 Probe 5800554 (chr. 4, 41818859 - 41818859 bp), -  
 P-Value: 3.64E-39

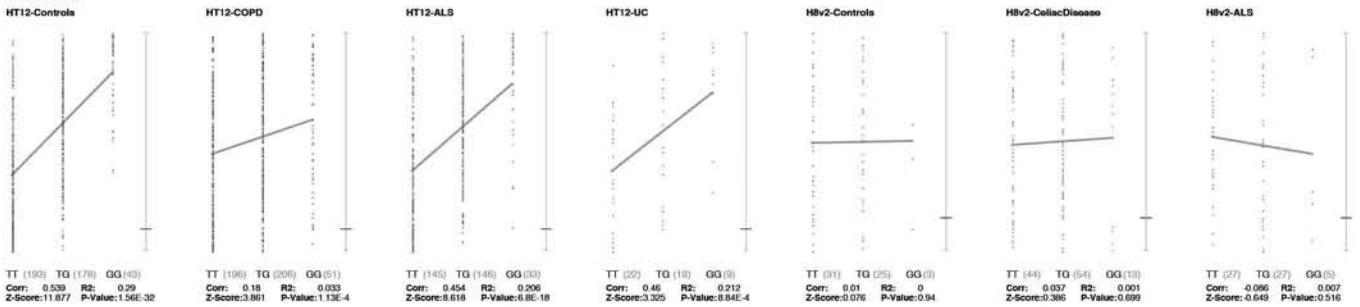

SNP rs495441 (chr. 6, 135468266 bp)  
Probe 450537 (chr. 11, 5229996 - 5429091 bp), HUG210000039953  
P-Value: 5.79E-40

HT12-Controls

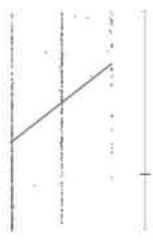

AA (217) AG (167) GG (30)  
Corr: 0.383 R2: 0.147  
Z-Score:0.076 P-Value:5.7E-16

HT12-COPD

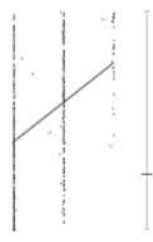

AA (235) AG (187) GG (31)  
Corr: 0.387 R2: 0.149  
Z-Score:0.54 P-Value:1.34E-17

HT12-ALS

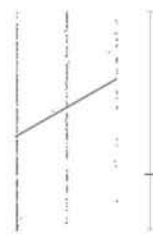

AA (178) AG (118) GG (28)  
Corr: 0.289 R2: 0.084  
Z-Score:0.295 P-Value:1.19E-7

HT12-UC

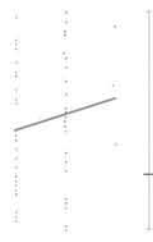

AA (22) AG (23) GG (3)  
Corr: 0.15 R2: 0.023  
Z-Score:1.032 P-Value:0.302

HBv2-Controls

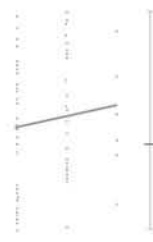

AA (20) AG (23) GG (6)  
Corr: 0.118 R2: 0.014  
Z-Score:0.89 P-Value:0.374

HBv2-ColicDisease

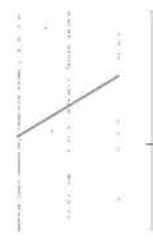

AA (62) AG (40) GG (9)  
Corr: 0.302 R2: 0.091  
Z-Score:3.226 P-Value:0.001

HBv2-ALS

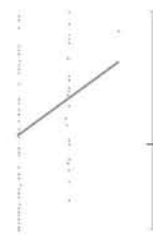

AA (37) AG (21) GG (11)  
Corr: 0.296 R2: 0.087  
Z-Score:2.274 P-Value:0.023

SNP rs9376992 (chr. 6, 135468937 bp)  
Probe 450537 (chr. 11, 5229996 - 5429091 bp), HUG210000039953  
P-Value: 3.8E-40

HT12-Controls

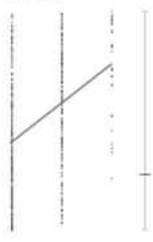

CC (218) CA (167) AA (31)  
Corr: 0.387 R2: 0.15  
Z-Score:0.166 P-Value:3.19E-16

HT12-COPD

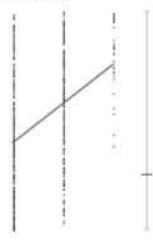

CC (233) CA (188) AA (31)  
Corr: 0.383 R2: 0.147  
Z-Score:0.453 P-Value:2.83E-17

HT12-ALS

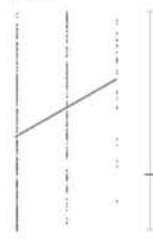

CC (178) CA (118) AA (28)  
Corr: 0.29 R2: 0.084  
Z-Score:0.321 P-Value:1.03E-7

HT12-UC

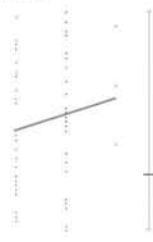

CC (23) CA (23) AA (3)  
Corr: 0.153 R2: 0.023  
Z-Score:1.05 P-Value:0.294

HBv2-Controls

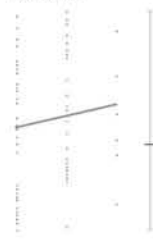

CC (30) CA (23) AA (6)  
Corr: 0.119 R2: 0.014  
Z-Score:0.901 P-Value:0.368

HBv2-ColicDisease

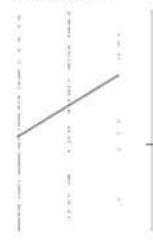

CC (62) CA (40) AA (9)  
Corr: 0.309 R2: 0.096  
Z-Score:3.304 P-Value:9.53E-4

HBv2-ALS

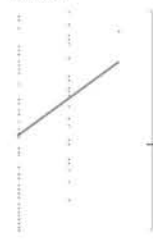

CC (37) CA (21) AA (11)  
Corr: 0.296 R2: 0.088  
Z-Score:2.276 P-Value:0.023

SNP rs1117139 (chr. 12, 54756892 bp)  
Probe 5800707 (chr. 4, 17410076 - 17428479 bp), AC110758.2  
P-Value: 4.8E-44

HT12-Controls

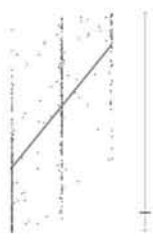

TT (158) TC (196) CC (60)  
Corr: 0.651 R2: 0.424  
Z-Score:15.061 P-Value:2.92E-51

HT12-COPD

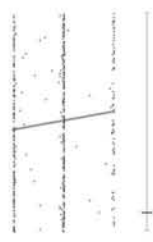

TT (153) TC (225) CC (75)  
Corr: 0.696 R2: 0.009  
Z-Score:2.047 P-Value:0.041

HT12-ALS

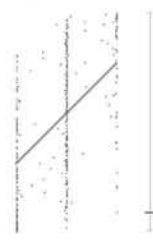

TT (102) TC (174) CC (48)  
Corr: 0.509 R2: 0.26  
Z-Score:9.829 P-Value:4.7E-23

HT12-UC

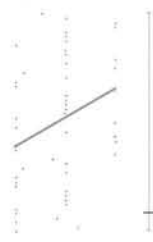

TT (18) TC (24) CC (9)  
Corr: 0.314 R2: 0.098  
Z-Score:2.195 P-Value:0.028

HBv2-Controls

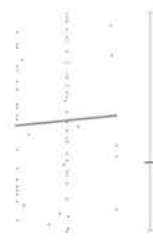

TT (22) TC (32) CC (5)  
Corr: 0.046 R2: 0.002  
Z-Score:0.347 P-Value:0.729

HBv2-ColicDisease

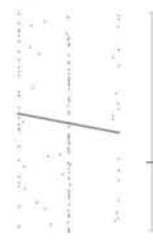

TT (83) TC (59) CC (19)  
Corr: -0.094 R2: 0.009  
Z-Score:-0.982 P-Value:0.326

HBv2-ALS

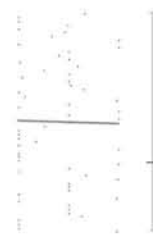

TT (24) TC (25) CC (10)  
Corr: 0.015 R2: 0  
Z-Score:0.113 P-Value:0.91

SNP rs12718567 (chr. 7, 50325922 bp)  
Probe 4900309 (chr. 2, 190709731 - 19077453 bp), AC010679.6  
P-Value: 3.26E-51

HT12-Controls

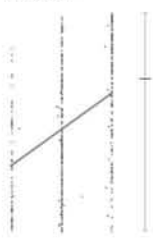

AA (94) AC (197) CC (153)  
Corr: 0.394 R2: 0.155  
Z-Score:8.327 P-Value:8.26E-17

HT12-COPD

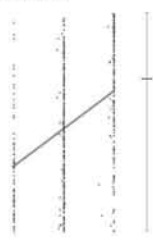

AA (68) AC (226) CC (159)  
Corr: 0.401 R2: 0.16  
Z-Score:8.875 P-Value:6.98E-19

HT12-ALS

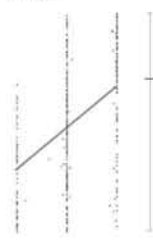

AA (56) AC (163) CC (105)  
Corr: 0.454 R2: 0.206  
Z-Score:8.613 P-Value:7.09E-18

HT12-UC

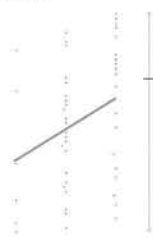

AA (7) AC (23) CC (10)  
Corr: 0.333 R2: 0.111  
Z-Score:2.536 P-Value:0.019

HBv2-Controls

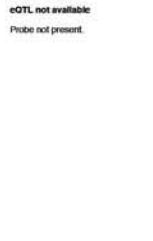

eQTL not available  
Probe not present.

HBv2-ColicDisease

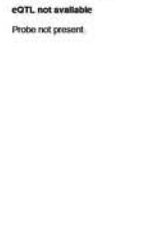

eQTL not available  
Probe not present.

HBv2-ALS

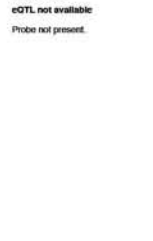

eQTL not available  
Probe not present.

SNP rs1117139 (chr. 12, 54756892 bp)  
Probe 5800554 (chr. 4, 41816859 - 41816859 bp), -  
P-Value: 1.82E-59

HT12-Controls

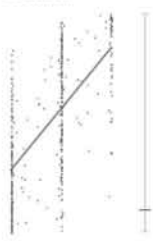

TT (158) TC (196) CC (60)  
Corr: 0.644 R2: 0.415  
Z-Score:14.844 P-Value:7.66E-50

HT12-COPD

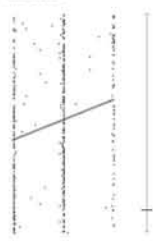

TT (153) TC (225) CC (75)  
Corr: 0.213 R2: 0.046  
Z-Score:4.581 P-Value:4.63E-6

HT12-ALS

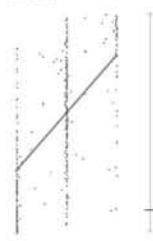

TT (102) TC (174) CC (48)  
Corr: 0.589 R2: 0.347  
Z-Score:11.707 P-Value:1.17E-31

HT12-UC

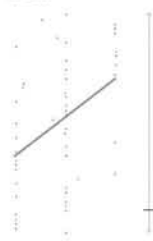

TT (18) TC (24) CC (9)  
Corr: 0.415 R2: 0.172  
Z-Score:2.961 P-Value:0.003

HBv2-Controls

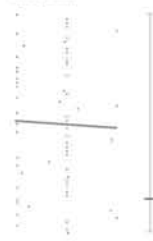

TT (22) TC (32) CC (5)  
Corr: -0.032 R2: 0.001  
Z-Score:0.239 P-Value:0.811

HBv2-ColicDisease

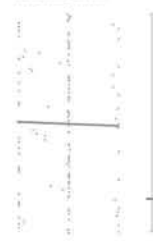

TT (83) TC (59) CC (19)  
Corr: -0.02 R2: 0  
Z-Score:0.206 P-Value:0.837

HBv2-ALS

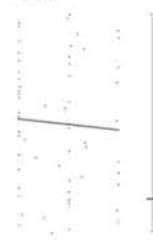

TT (24) TC (25) CC (10)  
Corr: 0.061 R2: 0.004  
Z-Score:0.458 P-Value:0.647
